# Supplementary material for: Discovery of candidate biomarkers from plasma-derived extracellular vesicles of patients with cirrhosis and hepatocellular carcinoma: an exploratory proteomic study
Source: Royal Society of Chemistry journal article supplement (doi:10.1039/d4mo00043a), 2024-07-16
Supplement: d4mo00043a1.pdf [file d4mo00043a1.pdf]

## Supplementary figure 1. Western blot images originales of extracellular vesicle markers

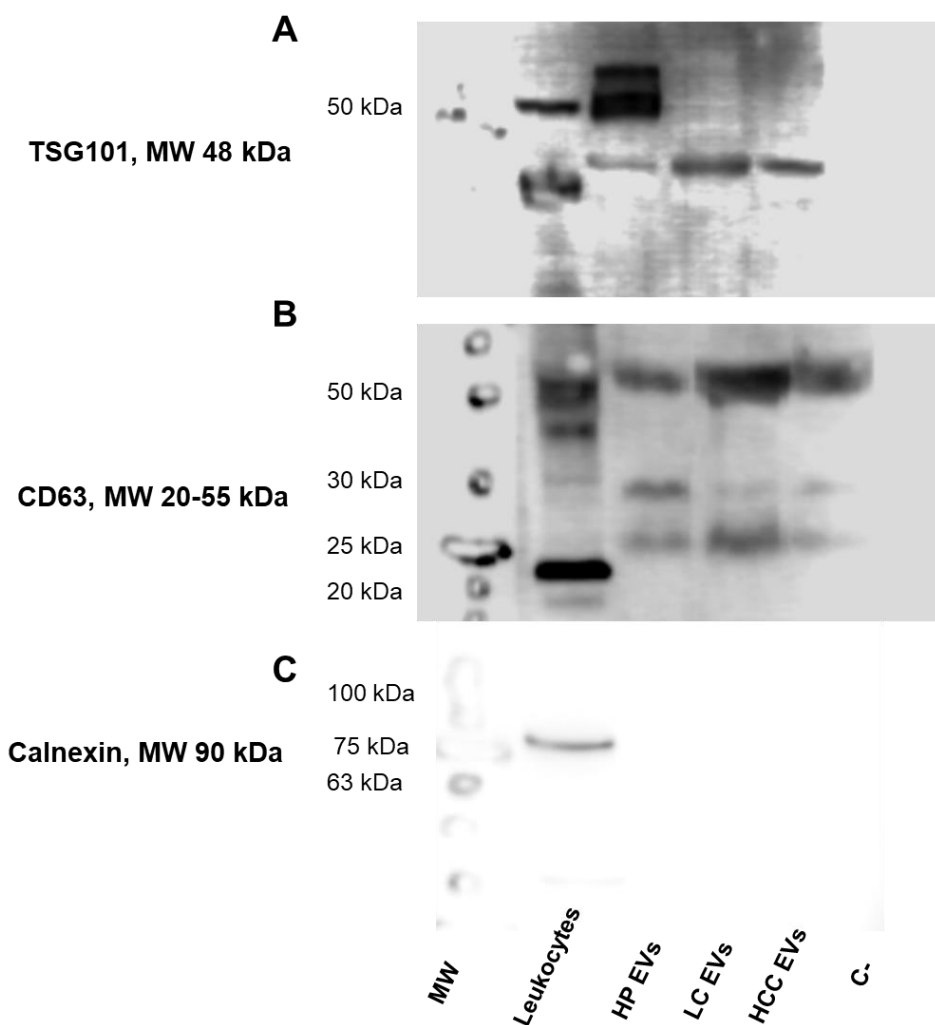

**Supplementary figure 1.** Original western blot images, used to validate the successful isolation of extracellular vesicles in each research group, using specific markers of EVs A) TSG101, B) CD63 and C) calnexin as purity control. We did not perform quantification of each marker used, so we did not include triplicates of each marker.

MW; Wright marker, EVs; extracellular vesicles, HP; healthy participant, LC; liver cirrhosis, HCC; hepatocellular carcinoma, C- negative control.
