# Supplementary material for: Discovery of candidate biomarkers from plasma-derived extracellular vesicles of patients with cirrhosis and hepatocellular carcinoma: an exploratory proteomic study
Source: Royal Society of Chemistry journal article supplement (doi:10.1039/d4mo00043a), 2024-07-16
Supplement: d4mo00043a2.xlsx [file d4mo00043a2.xlsx]

## Sheet: Table S1
Table S1: Biochemical parameters of liver function.
Group	n	Gender M/F	Albumin g/dL	TB mg/dL	DB mg/dL	IB mg/dL	Hepatic enzymes
							ALT UI/L	AST UI/L	GGT UI/L
HP	8	4/4	4.18 ± 0.22	0.76 ± 0.19	0.11 ± 0.03	0.65 ± 0.16	22.22 ± 4.54	25.33 ± 6.24	30.75 ± 10.53
LC	8	4/4	3.06 ± 0.72	1.25 ± 1.05	0.54 ± 0.68	0.72 ± 0.46	69.77 ± 47.20	79.44 ± 54.55	237 ± 38
HCC	8	4/4	3.41 ± 0.96	0.84 ± 0.59	0.31 ± 0.21	0.68 ± 0.43	39.83 ± 33.63	46.83 ± 23.58	109 ± 9
Abbreviations: HCC, hepatocellular carcinoma; LC, liver cirrhosis; HP, healthy participants; M, male; F, female; TB, total bilirubin; DB, direct bilirubin; IB, indirect bilirubin; ALT, alanine aminotransferase; AST, aspartate aminotransferase; GGT, gamma-glutamyl transpeptidase.

## Sheet: Table S2
Table S2: Proteins identified by proteomic analysis using LFQ intensity value ≠ 0 and MS/MS (spectral) count ≥2 in at least one of biological replicates.
Protein IDs	Majority protein IDs	Protein names	Gene names	LFQ intensity HP-1.1	LFQ intensity HP-1.2	LFQ intensity HP-1.3	LFQ intensity LC-1.1	LFQ intensity LC-1.2	LFQ intensity LC-1.3	LFQ intensity HCC-1.1	LFQ intensity HCC-1.2	LFQ intensity HCC-1.3	MS/MS count
P04114	P04114	Apolipoprotein B-100;Apolipoprotein B-48	APOB	35.1405	34.965	34.99	34.3754	34.4304	34.4292	34.3341	34.1839	34.3805	3080
P01023	P01023	Alpha-2-macroglobulin	A2M	35.9952	35.8355	35.7315	36.3852	36.5518	36.4412	36.137	35.3965	35.6068	3053
P01024;CON__Q2UVX4;Q91132;O95568	P01024	Complement C3;Complement C3 beta chain;C3-beta-c;Complement C3 alpha chain;C3a anaphylatoxin;Acylation stimulating protein;Complement C3b alpha chain;Complement C3c alpha chain fragment 1;Complement C3dg fragment;Complement C3g fragment;Complement C3d fragment;Complement C3f fragment;Complement C3c alpha chain fragment 2	C3	35.901	35.7315	35.6761	35.6925	35.6305	35.6793	35.8028	35.6191	35.7004	2919
P0DOX5;P01857	P0DOX5;P01857	Ig gamma-1 chain C region	IGHG1	36.2761	35.6022	35.676	36.9593	36.6135	36.5964	36.7547	35.4303	36.1689	1453
P0C0L4;CON__ENSEMBL:ENSBTAP00000007350;CON__P01030	P0C0L4	Complement C4-A;Complement C4 beta chain;Complement C4-A alpha chain;C4a anaphylatoxin;C4b-A;C4d-A;Complement C4 gamma chain	C4A	33.5136	33.391	33.2032	33.1114	32.8568	32.964	33.4406	33.5177	33.4242	1282
P0DOX7	P0DOX7	Immunoglobulin kappa light chain	IGK	34.5212	33.8839	33.8246	35.5135	35.2994	35.4402	35.9271	36.3301	36.0959	1233
P02787;A5A6I6;Q921I1;CON__Q2HJF0;P02789	P02787;A5A6I6	Serotransferrin	TF	33.6143	33.6429	33.59	33.7499	33.8041	33.8701	33.5546	33.9207	33.7372	828
P01871	P01871	Ig mu chain C region	IGHM	33.9432	33.8907	33.8533	34.8543	34.4662	34.6616	34.127	33.8895	33.8782	826
P02647;P0DM91;P68292;H0VVW3;CON__P15497	P02647;P0DM91;P68292	Apolipoprotein A-I;Proapolipoprotein A-I;Truncated apolipoprotein A-I	APOA1	34.7787	34.9342	34.7765	34.5413	34.697	34.7024	34.4075	34.5166	34.871	807
P02751;P11276	P02751	Fibronectin;Anastellin;Ugl-Y1;Ugl-Y2;Ugl-Y3	FN1	32.4328	32.2771	32.6502	32.4035	32.0671	32.3021	32.0707	31.5814	31.8647	744
P01876	P01876	Ig alpha-1 chain C region	IGHA1	34.016	33.7881	33.8761	35.1469	35.0214	34.8526	35.3959	34.8	35.1558	721
P08603;Q02985	P08603	Complement factor H	CFH	33.0217	33.1088	33.0304	32.895	32.9159	32.795	32.5089	32.5368	32.4402	701
P01859	P01859	Ig gamma-2 chain C region	IGHG2	33.1295	33.4787	33.2464	33.8485	33.5405	33.5998	34.0839	33.9043	33.9234	680
P00450;CON__ENSEMBL:ENSBTAP00000031900	P00450	Ceruloplasmin	CP	31.4052	31.3817	31.3517	31.4627	31.748	31.7055	31.914	32.0186	32.1509	567
P00747;P06868;CON__P06868;P06867;Q02325;Q15195	P00747	Plasminogen;Plasmin heavy chain A;Activation peptide;Angiostatin;Plasmin heavy chain A, short form;Plasmin light chain B	PLG	32.098	32.1692	32.0245	31.5956	31.6584	31.5407	31.4056	31.5791	31.5035	524
P01031;CON__Q1A7A4	P01031	Complement C5;Complement C5 beta chain;Complement C5 alpha chain;C5a anaphylatoxin;Complement C5 alpha chain	C5	31.3639	31.1414	30.9643	31.2825	30.9414	30.9775	31.2173	30.4019	30.7391	461
P00738	P00738	Haptoglobin;Haptoglobin alpha chain;Haptoglobin beta chain	HP	33.0858	32.9132	32.8152	31.4897	31.7758	31.7694	33.8396	33.6769	33.7654	453
P0DOY2;P0DOY3;P0CF74	P0DOY2;P0DOY3;P0CF74	Ig lambda-6 chain C region	IGLC6	33.8961	33.2303	33.1431	34.4738	34.4694	34.3625	34.3715	34.7222	34.4372	411
P19823;CON__Q9TRI1	P19823	Inter-alpha-trypsin inhibitor heavy chain H2	ITIH2	31.7406	31.693	31.5617	31.1756	31.1327	31.0004	31.0375	31.1439	31.0506	360
P04003;Q63514	P04003	C4b-binding protein alpha chain	C4BPA	31.9124	31.7307	31.8349	31.4174	31.5365	31.4481	31.144	30.9625	31.0762	346
P01009	P01009	Alpha-1-antitrypsin;Short peptide from AAT	SERPINA1	31.8138	31.8967	31.6349	32.0828	32.5518	32.4603	32.3705	32.145	32.2706	344
Q14624;CON__Q3T052;P79263	Q14624	Inter-alpha-trypsin inhibitor heavy chain H4;70 kDa inter-alpha-trypsin inhibitor heavy chain H4;35 kDa inter-alpha-trypsin inhibitor heavy chain H4	ITIH4	30.6746	30.631	30.4939	30.3635	30.5198	30.3426	30.8385	30.9482	31.1026	341
P19827;CON__Q0VCM5	P19827	Inter-alpha-trypsin inhibitor heavy chain H1	ITIH1	30.7513	31.1034	30.8921	30.1374	30.1266	29.9974	30.3533	30.6554	30.3873	306
P02675;CON__P02676	P02675	Fibrinogen beta chain;Fibrinopeptide B;Fibrinogen beta chain	FGB	31.8642	31.4978	31.7443	31.5522	31.5377	31.8343	31.4988	30.7531	30.9403	291
P01861	P01861	Ig gamma-4 chain C region	IGHG4	31.4748	31.5052	31.4146	32.0236	31.6347	31.6218	31.1797	27.3996	30.6126	257
P02671;CON__P02672	P02671	Fibrinogen alpha chain;Fibrinopeptide A;Fibrinogen alpha chain	FGA	31.4555	31.358	31.4602	31.2941	31.6011	31.8635	30.7498	30.1613	30.1382	255
P02679;P12799	P02679	Fibrinogen gamma chain	FGG	31.6249	31.6849	31.7724	31.7147	31.3397	31.6997	31.2188	30.1567	30.1938	242
P01834	P01834	Ig kappa chain C region	IGKC	32.4387	32.2874	32.0694	33.3158	33.2445	33.071	33.3099	32.4618	32.8953	220
P00734	P00734	Prothrombin;Activation peptide fragment 1;Activation peptide fragment 2;Thrombin light chain;Thrombin heavy chain	F2	30.2325	30.086	29.8847	29.812	29.8099	29.7423	30.0714	28.5392	29.6965	216
P00736;Q8CG16	P00736	Complement C1r subcomponent;Complement C1r subcomponent heavy chain;Complement C1r subcomponent light chain	C1R	29.661	29.6492	29.6799	29.6461	29.697	29.5063	28.9751	28.1145	29.4837	216
P00751;Q864V9;Q864W0;Q864W1	P00751;Q864V9;Q864W0;Q864W1	Complement factor B;Complement factor B Ba fragment;Complement factor B Bb fragment	CFB	29.4971	29.3	29.0973	29.1927	29.4082	29.3445	29.9706	30.0728	30.1534	214
P04196	P04196	Histidine-rich glycoprotein	HRG	29.8984	29.5799	29.8676	29.6225	29.6926	29.5497	29.7224	29.622	30.201	210
P02790	P02790	Hemopexin	HPX	30.6803	30.7445	30.6497	30.5546	30.7052	30.4157	30.4068	29.2727	29.7424	208
P06727;CON__Q32PJ2	P06727	Apolipoprotein A-IV	APOA4	29.3384	29.2598	29.1294	30.0632	30.3729	30.379	30.2696	30.1599	30.2027	208
P02774;CON__Q3MHN5;CON__ENSEMBL:ENSBTAP00000018229	P02774	Vitamin D-binding protein	GC	28.8978	29.0344	28.9964	28.8471	28.68	28.7069	29.3803	28.6612	29.1118	178
P02749;CON__P17690;Q01339	P02749	Beta-2-glycoprotein 1	APOH	29.5994	29.5991	29.4691	29.5478	29.4979	29.3863	29.3957	29.1472	29.3343	173
P02649;Q9GJU3;P0DMM1;CON__Q03247;P18650	P02649;Q9GJU3	Apolipoprotein E	APOE	30.7255	30.5088	30.467	30.5492	30.4693	30.5046	31.0146	30.8366	30.8595	163
P10643	P10643	Complement component C7	C7	28.0599	27.911	28.081	29.9041	29.9097	29.9624	29.1688	28.0052	28.8752	162
P02766;Q5U7I5	P02766	Transthyretin	TTR	30.0233	30.1857	29.8906	29.82	29.2752	29.1924	29.3304	28.6085	29.4971	158
P09871	P09871	Complement C1s subcomponent;Complement C1s subcomponent heavy chain;Complement C1s subcomponent light chain	C1S	29.0699	29.1358	28.9868	28.6153	29.0681	28.8084	28.2631	26.5638	26.5076	157
P01042;CON__P01045-1;CON__Q2KJ62;CON__P01044-1;O08677	P01042	Kininogen-1;Kininogen-1 heavy chain;T-kinin;Bradykinin;Lysyl-bradykinin;Kininogen-1 light chain;Low molecular weight growth-promoting factor	KNG1	29.4295	29.1957	29.1453	29.5248	29.3173	29.306	29.9269	29.9203	30.2512	154
P01860	P01860	Ig gamma-3 chain C region	IGHG3	30.8954	31.2576	31.225	31.5746	31.8848	31.3745	31.1603	28.9333	29.3226	153
P0DOX2	P0DOX2			30.1853	30.0531	30.1709	31.1272	31.0566	30.9854	31.3302	31.9258	32.1015	143
O43866	O43866	CD5 antigen-like	CD5L	30.1146	30.016	30.0704	30.3828	30.8823	30.8755	29.3029	30.3255	30.1014	141
P07358	P07358	Complement component C8 beta chain	C8B	28.5772	28.7118	28.6637	28.1587	28.3394	28.5438	28.7034	28.6273	28.3609	132
P08519	P08519	Apolipoprotein(a)	LPA	29.608	29.3415	29.089	27.3624	26.8755	26.9347	25.7223	NaN	NaN	131
P01619	P01619	Ig kappa chain V-III region B6		31.1616	30.7006	30.2866	32.3345	32.4545	32.5077	32.0616	32.2468	32.2661	129
P02652;Q8MIQ5;P0DM95	P02652;Q8MIQ5;P0DM95	Apolipoprotein A-II;Proapolipoprotein A-II;Truncated apolipoprotein A-II	APOA2	31.2946	31.342	30.9316	30.9501	30.7934	30.7163	31.2072	30.9193	31.1697	128
P01008;CON__P41361	P01008	Antithrombin-III	SERPINC1	28.5876	28.5559	28.5386	28.424	28.2626	28.313	28.4794	28.6659	28.9753	120
P02760	P02760	Protein AMBP;Alpha-1-microglobulin;Inter-alpha-trypsin inhibitor light chain;Trypstatin	AMBP	29.5582	28.9738	29.1464	29.4822	29.9372	29.7649	29.8947	30.1586	30.3216	117
P07225;CON__P07224	P07225	Vitamin K-dependent protein S	PROS1	29.3437	29.1378	29.0938	29.0549	28.8076	28.7523	29.1726	27.9151	28.7236	115
P04217;CON__Q2KJF1;Q2KJF1	P04217	Alpha-1B-glycoprotein	A1BG	28.6036	28.4087	28.6071	28.9308	28.7847	28.6649	29.0223	29.516	29.6502	114
P10909	P10909	Clusterin;Clusterin beta chain;Clusterin alpha chain	CLU	29.633	28.9184	29.1067	28.8719	29.0157	29.0701	29.8162	29.4117	29.4399	110
P68871;P68223;P02057	P68871	Hemoglobin subunit beta;LVV-hemorphin-7;Spinorphin	HBB	28.9636	29.0096	28.8186	30.0162	29.8482	30.1559	28.7998	29.8858	29.3058	104
Q96PD5;CON__ENSEMBL:ENSBTAP00000016285	Q96PD5	N-acetylmuramoyl-L-alanine amidase	PGLYRP2	27.7549	27.9416	27.8182	28.0635	27.8551	27.727	27.3037	NaN	26.1811	104
P05156;Q61129;CON__Q32PI4	P05156	Complement factor I;Complement factor I heavy chain;Complement factor I light chain	CFI	27.9688	27.9646	27.911	27.5004	27.1891	27.1785	27.5607	27.014	27.3223	103
P20742	P20742	Pregnancy zone protein	PZP	27.9838	27.6733	27.6497	26.4989	26.4229	26.5376	26.3123	25.8906	26.0379	101
P0DOX8;B9A064;P0CG04;P01709	P0DOX8;B9A064;P0CG04	Immunoglobulin lambda-like polypeptide 5;Ig lambda-1 chain C regions	IGLL5;IGLC1	30.5414	29.2235	29.1069	30.5563	30.6748	31.2001	31.9527	33.8216	33.2928	100
P13671	P13671	Complement component C6	C6	27.8088	27.8775	27.9448	27.7498	27.83	27.4543	27.1031	25.1007	25.3328	97
P05546;CON__ENSEMBL:ENSBTAP00000018574	P05546	Heparin cofactor 2	SERPIND1	28.3183	28.1794	28.1925	27.3746	27.2728	27.1695	28.8345	27.754	28.409	95
P01011;P29621;Q91WP6;Q5I2A0;Q80X76	P01011	Alpha-1-antichymotrypsin;Alpha-1-antichymotrypsin His-Pro-less	SERPINA3	28.8848	28.5271	28.5037	28.9012	28.9589	28.938	29.9848	30.1385	30.2824	94
Q08380	Q08380	Galectin-3-binding protein	LGALS3BP	26.8019	26.4582	26.3609	27.8093	28.0819	28.03	27.6936	27.0243	27.9653	91
Q9Y6R7	Q9Y6R7	IgGFc-binding protein	FCGBP	26.5707	26.113	26.5285	27.6205	27.6998	27.3975	27.1504	25.7967	26.8923	89
P08697;CON__P28800	P08697	Alpha-2-antiplasmin	SERPINF2	27.8178	28.035	28.0713	27.1298	27.1832	27.1322	27.4632	26.7251	26.5178	88
P02765;Q9N2D0	P02765;Q9N2D0	Alpha-2-HS-glycoprotein;Alpha-2-HS-glycoprotein chain A;Alpha-2-HS-glycoprotein chain B	AHSG	28.1296	27.784	27.8379	28.1234	28.2041	28.1359	28.3429	28.7605	28.5222	87
A0A075B6S5	A0A075B6S5		IGKV1-27	28.2825	28.1777	27.9725	29.7795	28.9786	28.9031	28.8037	29.0937	28.7971	86
P04432;P01597	P04432;P01597	Ig kappa chain V-I region Daudi;Ig kappa chain V-I region DEE		27.8323	28.0715	27.5261	30.5001	29.4493	29.3395	28.8893	29.2366	29.3029	84
O75636	O75636	Ficolin-3	FCN3	28.2106	27.8221	28.2329	27.3898	27.6163	27.4073	27.0981	NaN	25.4556	74
P02745;P31720	P02745	Complement C1q subcomponent subunit A	C1QA	28.9525	29.0821	28.8784	29.5699	29.2805	29.1645	28.3896	28.9298	29.1039	73
P03952;Q2KJ63	P03952	Plasma kallikrein;Plasma kallikrein heavy chain;Plasma kallikrein light chain	KLKB1	27.7184	27.0634	27.0621	27.2249	26.9077	26.826	27.5768	28.2324	28.1573	71
P02748;P48770;CON__Q3MHN2	P02748	Complement component C9;Complement component C9a;Complement component C9b	C9	27.6432	27.0721	27.2505	28.7043	28.2712	28.5241	29.0473	29.1497	29.1616	69
P06312	P06312	Ig kappa chain V-IV region	IGKV4-1	29.7923	29.6211	29.1655	30.5658	30.2193	30.3213	28.7757	27.4693	28.2811	68
P01624;A0A0C4DH55	P01624	Ig kappa chain V-III region POM		30.3227	30.3364	30.0953	32.3067	31.4944	31.4893	31.0174	31.7368	31.5581	67
P07360	P07360	Complement component C8 gamma chain	C8G	28.2526	28.5598	28.5225	27.9865	28.2575	28.1533	28.0528	27.8961	28.267	67
Q06033;CON__Q0V8M9	Q06033	Inter-alpha-trypsin inhibitor heavy chain H3	ITIH3	26.0085	26.5841	26.0924	26.5712	26.5176	26.6598	27.3598	27.7441	27.6806	67
P07357	P07357	Complement component C8 alpha chain	C8A	27.0858	27.493	27.5029	26.1519	26.6857	26.7572	27.2859	27.2557	27.2837	66
P27169;P27170	P27169	Serum paraoxonase/arylesterase 1	PON1	28.6383	28.2018	28.3357	27.6175	27.7747	27.7777	28.418	28.3136	28.5551	65
P43652;O89020;CON__REFSEQ:XP_585019	P43652	Afamin	AFM	26.8563	26.8008	26.7304	26.8008	26.9164	26.8987	27.0443	NaN	26.7627	65
P29622;Q5RCR2	P29622;Q5RCR2	Kallistatin	SERPINA4	26.6995	27.0332	26.9882	26.8897	26.6203	26.641	26.7007	26.3891	NaN	64
P02763	P02763	Alpha-1-acid glycoprotein 1	ORM1	28.0493	27.3843	27.6543	27.45	27.9471	27.9173	27.3498	29.8764	28.4734	63
P05160	P05160	Coagulation factor XIII B chain	F13B	26.4187	26.5376	26.4205	26.3448	26.5297	26.2201	25.5721	NaN	25.9693	63
P35858	P35858	Insulin-like growth factor-binding protein complex acid labile subunit	IGFALS	26.5818	26.5184	26.3313	25.5718	25.3588	25.5076	25.4922	NaN	NaN	63
P01591	P01591	Immunoglobulin J chain	IGJ	30.2548	30.0614	30.0003	31.3989	31.2709	31.3313	31.0829	30.9745	31.1119	61
A0A075B6K5	A0A075B6K5		IGLV3-9	28.7183	28.2942	28.1156	29.77	29.3456	29.3649	29.2112	NaN	28.427	60
P04004;CON__Q3ZBS7	P04004	Vitronectin;Vitronectin V65 subunit;Vitronectin V10 subunit;Somatomedin-B	VTN	28.4062	28.4977	28.2736	27.9524	28.0457	28.1015	27.9469	29.2337	29.1426	60
P02656;P18659;P19035	P02656	Apolipoprotein C-III	APOC3	31.1287	30.7217	30.5143	29.5053	29.9441	29.9923	30.6472	31.6668	31.5786	59
P00739	P00739	Haptoglobin-related protein	HPR	28.1681	28.6181	28.4433	27.2912	27.1598	27.0261	25.8067	NaN	NaN	57
P02746;P31721;P14106	P02746	Complement C1q subcomponent subunit B	C1QB	29.2689	28.2405	29.0348	29.5028	29.5619	29.4169	29.2471	29.3827	27.9345	56
O14791	O14791	Apolipoprotein L1	APOL1	27.7354	27.7558	27.8181	26.7817	26.6264	26.7598	26.3649	26.7033	25.8886	54
A0A075B6R2;P0DP07	A0A075B6R2		IGHV4-4	28.6292	27.8249	27.6982	30.1771	29.9661	29.9717	30.1358	30.2138	29.8924	52
P0C0L5	P0C0L5	Complement C4-B;Complement C4 beta chain;Complement C4-B alpha chain;C4a anaphylatoxin;C4b-B;C4d-B;Complement C4 gamma chain	C4B	28.0498	28.5394	28.4929	27.7294	27.4462	27.4133	28.2905	NaN	27.5676	52
P01700	P01700	Ig lambda chain V-I region HA		29.6356	29.3376	29.2055	31.2609	30.7119	30.8215	30.2836	29.877	30.1383	51
P02747	P02747	Complement C1q subcomponent subunit C	C1QC	29.9499	29.8417	29.7215	30.4615	30.0879	30.1516	30.0562	28.5625	28.5965	49
P0DOX3;P01880	P0DOX3;P01880	Ig delta chain C region	IGHD	27.5863	27.2512	27.3746	27.9691	28.1224	28.0432	27.6206	NaN	27.4206	49
P22792	P22792	Carboxypeptidase N subunit 2	CPN2	26.0992	25.8122	25.9779	26.2544	25.4681	25.3311	27.1507	26.7394	26.7834	49
P01019;Q9GLN8;Q9TSZ0	P01019;Q9GLN8	Angiotensinogen;Angiotensin-1;Angiotensin-2;Angiotensin-3;Angiotensin-4;Angiotensin 1-9;Angiotensin 1-7;Angiotensin 1-5;Angiotensin 1-4	AGT	26.2472	26.2542	26.0509	26.5979	25.9839	25.7966	26.7095	26.9407	26.9038	45
P04433;A0A0A0MRZ8	P04433;A0A0A0MRZ8	Ig kappa chain V-III region VG	IGKV3D-11	29.2225	28.7171	28.4207	31.3092	30.6047	30.6178	30.0926	30.7309	30.3993	45
P01599	P01599	Ig kappa chain V-I region Gal		27.2537	27.2458	26.8654	28.3624	27.5958	27.8617	27.594	28.3198	27.6619	44
P01782;P0DP04	P01782;P0DP04	Ig heavy chain V-III region DOB		27.1371	28.6743	28.5954	28.6394	28.8772	28.7033	29.4473	NaN	NaN	44
P05155;CON__P50448	P05155	Plasma protease C1 inhibitor	SERPING1	26.3287	26.6103	26.2965	27.1852	26.7274	26.6988	26.8637	NaN	26.6679	44
P0DP02	P0DP02			26.7366	28.9212	28.5175	28.3155	28.2338	27.8622	26.6859	27.7746	NaN	44
A0A075B6S2;A2NJV5;A0A0A0MRZ7	A0A075B6S2;A2NJV5;A0A0A0MRZ7		IGKV2D-29;IGKV A18;IGKV2D-26	31.0553	30.4137	30.1096	31.3413	31.4419	31.5005	30.0044	28.7679	NaN	43
P20851;Q63515	P20851	C4b-binding protein beta chain	C4BPB	27.4258	27.3639	27.2725	26.513	26.6671	26.6984	28.1534	27.6979	27.7796	43
P05090	P05090	Apolipoprotein D	APOD	28.7399	28.8835	28.1214	28.3309	28.7523	28.7369	28.6794	26.992	27.6659	42
P36955;CON__Q95121	P36955	Pigment epithelium-derived factor	SERPINF1	25.8895	25.4732	25.2201	26.6429	26.3537	26.5316	26.4269	26.676	26.937	42
O95445	O95445	Apolipoprotein M	APOM	27.1255	27.227	27.1193	26.7899	26.6595	26.722	26.1538	NaN	NaN	39
P02743	P02743	Serum amyloid P-component;Serum amyloid P-component(1-203)	APCS	28.4508	27.696	27.8818	28.1437	27.8384	28.0645	28.86	28.9807	28.9025	39
A0A0C4DH38;A0A0J9YXX1	A0A0C4DH38;A0A0J9YXX1		IGHV5-51	27.8833	27.7035	27.7124	29.163	28.8704	28.5799	28.4334	28.1056	28.3763	38
Q03591	Q03591	Complement factor H-related protein 1	CFHR1	27.154	26.0033	26.2033	26.5149	27.0154	27.0376	26.9363	27.5493	27.616	38
P01833	P01833	Polymeric immunoglobulin receptor;Secretory component	PIGR	25.0982	24.8566	24.7747	26.7718	26.2766	26.4761	26.7821	26.854	26.3364	37
P02654;P0DMA7;P0CE40;P34929;P18657;P0DPG1;P0DOA2;P0DKU8;H9FNA4;A0A096P2H7;P0DKV4;P0DKV3	P02654;P0DMA7;P0CE40;P34929;P18657;P0DPG1;P0DOA2;P0DKU8;H9FNA4;A0A096P2H7;P0DKV4;P0DKV3	Apolipoprotein C-I;Truncated apolipoprotein C-I	APOC1	28.0844	28.3189	27.8843	26.6897	27.3215	27.4438	27.53	27.4119	28.2402	37
P19652	P19652	Alpha-1-acid glycoprotein 2	ORM2	26.1253	25.2782	25.8273	25.3917	25.6203	25.5872	25.8165	26.104	26.2799	36
Q96IY4	Q96IY4	Carboxypeptidase B2	CPB2	25.9024	26.1201	26.0502	25.2767	24.7769	25.1707	25.3049	NaN	NaN	35
A0A0A0MS15	A0A0A0MS15		IGHV3-49	26.6617	26.7748	26.648	27.9495	27.7756	27.9886	26.3561	NaN	NaN	34
A0A0C4DH29	A0A0C4DH29		IGHV1-3	27.813	27.8885	28.2296	28.4777	29.2886	28.9522	28.2355	28.0317	28.0526	32
A0A0B4J1V0	A0A0B4J1V0		IGHV3-15	28.7252	28.996	29.1752	29.6158	29.7846	29.9333	29.1736	28.4507	28.3603	31
P01714	P01714	Ig lambda chain V-III region SH		28.1289	27.3731	27.1011	29.6306	29.4719	29.451	28.3125	NaN	28.3375	31
P02753;P06912	P02753	Retinol-binding protein 4;Plasma retinol-binding protein(1-182);Plasma retinol-binding protein(1-181);Plasma retinol-binding protein(1-179);Plasma retinol-binding protein(1-176)	RBP4	25.8481	25.1585	25.4186	25.5507	25.5969	25.4844	25.9104	NaN	25.8415	31
Q12805	Q12805	EGF-containing fibulin-like extracellular matrix protein 1	EFEMP1	24.0645	24.1504	23.8995	25.8743	25.4292	24.9627	26.1538	NaN	25.992	31
P27918	P27918	Properdin	CFP	26.0855	26.2538	25.8226	25.9472	25.833	25.8849	25.9048	NaN	NaN	30
P80748	P80748	Ig lambda chain V-III region LOI		27.1029	27.4283	27.4062	27.0675	27.3466	27.5878	25.3404	NaN	NaN	30
P04275;Q28833	P04275	von Willebrand factor;von Willebrand antigen 2	VWF	25.2775	24.4631	24.3924	27.1311	26.8671	26.8368	27.4782	26.3389	26.5747	29
A0A0B4J1U7	A0A0B4J1U7		IGHV6-1	28.1587	27.7465	27.602	29.246	29.356	29.5565	28.5054	NaN	NaN	28
P06331;P0DP06;A0A0C4DH41;P01825;P01824	P06331;P0DP06;A0A0C4DH41;P01825;P01824	Ig heavy chain V-II region ARH-77;Ig heavy chain V-II region NEWM;Ig heavy chain V-II region WAH	IGHV4-61	28.2723	28.436	28.0037	29.4814	29.4716	29.6596	28.9434	NaN	29.6164	28
P48740	P48740	Mannan-binding lectin serine protease 1;Mannan-binding lectin serine protease 1 heavy chain;Mannan-binding lectin serine protease 1 light chain	MASP1	25.9999	25.5434	25.8323	25.4931	25.9847	25.912	NaN	NaN	NaN	28
Q14520	Q14520	Hyaluronan-binding protein 2;Hyaluronan-binding protein 2 50 kDa heavy chain;Hyaluronan-binding protein 2 50 kDa heavy chain alternate form;Hyaluronan-binding protein 2 27 kDa light chain;Hyaluronan-binding protein 2 27 kDa light chain alternate form	HABP2	25.952	25.912	25.9778	25.3789	25.4844	25.4098	25.5437	NaN	25.0592	28
P0DP03;P01768	P0DP03;P01768	Ig heavy chain V-III region CAM		27.2989	27.9411	28.1127	28.6683	28.7328	28.7761	NaN	NaN	NaN	27
P00748	P00748	Coagulation factor XII;Coagulation factor XIIa heavy chain;Beta-factor XIIa part 1;Coagulation factor XIIa light chain	F12	24.9587	25.3486	24.9806	24.8069	24.3819	23.8654	NaN	25.4319	25.3125	26
A0A0C4DH73;P01611	A0A0C4DH73;P01611	Ig kappa chain V-I region Wes	IGKV1-12	24.5954	24.7232	24.7793	26.2183	25.1157	24.9221	NaN	NaN	25.5798	25
P01701	P01701	Ig lambda chain V-I region NEW		24.745	25.9323	25.0943	27.5797	26.5307	26.5757	25.2155	NaN	26.6839	25
P02655;P18658;P19034	P02655;P18658	Apolipoprotein C-II;Proapolipoprotein C-II	APOC2	29.5622	29.0829	29.0698	28.0847	28.4749	28.4953	28.434	28.9941	28.4999	25
P26927;Q2TV78	P26927	Hepatocyte growth factor-like protein;Hepatocyte growth factor-like protein alpha chain;Hepatocyte growth factor-like protein beta chain	MST1	25.1055	24.8861	25.1451	25.3228	25.2017	25.1525	24.5422	NaN	NaN	25
O75882;Q9WU60	O75882;Q9WU60	Attractin	ATRN;Atrn	NaN	24.3828	24.4298	24.6939	24.0995	24.6055	NaN	NaN	NaN	24
P01594;P01593	P01594;P01593	Ig kappa chain V-I region AU;Ig kappa chain V-I region AG	IGKV1-33	26.5324	26.1968	26.2686	27.682	27.8805	27.6115	28.4972	28.831	28.8004	24
Q16610	Q16610	Extracellular matrix protein 1	ECM1	25.7242	25.1893	25.7808	25.615	25.706	25.9366	24.9137	25.8157	NaN	24
P01718	P01718	Ig lambda chain V-IV region Kern		27.469	26.8083	26.7636	27.6544	27.8323	27.6744	27.9224	28.2901	28.494	23
P18428	P18428	Lipopolysaccharide-binding protein	LBP	24.1294	23.7302	23.8813	24.143	24.7052	24.8709	25.0099	NaN	25.2317	22
P55058	P55058	Phospholipid transfer protein	PLTP	23.4241	24.697	24.4152	24.6668	24.2505	24.1362	23.864	NaN	NaN	22
P63261;P60710;P60709;P86700;P63267;P68133;P68032;P62736;Q6S8J3;A5A3E0;P0CG38;Q9BYX7;P0CG39	P63261;P60710;P60709;P86700;P63267;P68133;P68032;P62736;Q6S8J3;A5A3E0	Actin, cytoplasmic 2;Actin, cytoplasmic 2, N-terminally processed;Actin, cytoplasmic 1;Actin, cytoplasmic 1, N-terminally processed;Actin, gamma-enteric smooth muscle;Actin, alpha skeletal muscle;Actin, alpha cardiac muscle 1;Actin, aortic smooth muscle;POTE ankyrin domain family member E;POTE ankyrin domain family member F	ACTG1;Actb;ACTB;ACTG2;ACTA1;ACTC1;ACTA2;POTEE;POTEF	25.6006	24.7167	24.6548	25.9438	25.579	25.9259	26.9267	28.6394	27.8206	22
A0A0B4J1X5	A0A0B4J1X5		IGHV3-74	27.0549	26.9413	26.668	28.5691	28.6062	28.7842	28.4914	28.6461	28.6245	21
P01703	P01703	Ig lambda chain V-I region NEWM		26.0542	26.1781	25.7246	27.9134	27.2629	27.2042	26.7407	26.5162	NaN	21
P01721	P01721	Ig lambda chain V-VI region AR		26.4341	26.061	26.0161	26.2755	26.6596	26.7427	27.0867	NaN	26.1281	21
P04430	P04430	Ig kappa chain V-I region BAN		26.209	26.557	26.1166	27.8035	26.7189	26.2829	26.0137	NaN	NaN	21
P08185;P50451	P08185	Corticosteroid-binding globulin	SERPINA6	24.2143	24.1212	24.2332	24.6708	24.1818	24.0571	NaN	NaN	NaN	21
P02686;P25188;P25274	P02686;P25188;P25274	Myelin basic protein	Mbp;MBP	24.7777	23.3676	23.1212	25.3147	24.7275	24.8899	25.9724	28.2314	27.5095	20
P02741	P02741	C-reactive protein;C-reactive protein(1-205)	CRP	24.0272	24.0585	24.0109	27.28	26.7563	26.6241	27.7163	27.5886	28.1607	20
P02750	P02750	Leucine-rich alpha-2-glycoprotein	LRG1	23.3955	23.0994	23.2441	24.237	24.5376	24.4378	24.8896	NaN	25.2166	20
P80108	P80108	Phosphatidylinositol-glycan-specific phospholipase D	GPLD1	25.1284	25.2752	25.1027	24.8227	24.4067	24.2446	NaN	NaN	NaN	20
P12259	P12259	Coagulation factor V;Coagulation factor V heavy chain;Coagulation factor V light chain	F5	23.5937	23.5935	23.2928	23.0879	23.3876	23.2928	NaN	NaN	NaN	19
A0A0B4J1Y9	A0A0B4J1Y9		IGHV3-72	26.6399	25.515	25.6792	26.7262	27.0711	27.1474	NaN	NaN	NaN	18
P0DP09;A0A0B4J2D9	P0DP09;A0A0B4J2D9		IGKV1D-13	25.0376	24.9852	24.9222	26.4446	26.1298	25.5797	25.7815	NaN	NaN	18
Q15848	Q15848	Adiponectin	ADIPOQ	24.3545	24.8961	24.8095	24.6838	24.6943	25.0634	24.5691	NaN	NaN	18
A0A075B6K4	A0A075B6K4		IGLV3-10	27.8786	27.1599	26.5442	28.3167	28.1305	28.1186	27.8764	NaN	NaN	17
A0A0B4J1V2	A0A0B4J1V2		IGHV2-26	24.606	25.0516	25.2846	24.9486	25.1183	23.9044	NaN	NaN	NaN	17
Q9BQE3;Q71U36;P68363;P0DPH8;P0DPH7;P68366;Q6PEY2;Q8WQ47;Q9NY65;Q9JJZ2;P14642	Q9BQE3;Q71U36;P68363;P0DPH8;P0DPH7;P68366;Q6PEY2;Q8WQ47;Q9NY65;Q9JJZ2	Tubulin alpha-1C chain;Tubulin alpha-1A chain;Tubulin alpha-1B chain;Tubulin alpha-4A chain;Tubulin alpha-3E chain;Tubulin alpha-8 chain	TUBA1C;TUBA1A;TUBA1B;TUBA4A;TUBA3E;TUBA8;Tuba8	24.2267	22.8862	22.824	24.2417	23.8632	24.7698	25.7955	27.7589	26.7988	17
P23083	P23083	Ig heavy chain V-I region V35		NaN	26.8249	26.5491	27.585	27.1583	28.0096	28.3844	28.9477	28.7834	17
P01602	P01602	Ig kappa chain V-I region HK102	IGKV1-5	26.3846	26.6023	27.133	28.9794	27.718	27.8288	NaN	NaN	NaN	16
P03951;Q91Y47;P26262;P14272	P03951	Coagulation factor XI;Coagulation factor XIa heavy chain;Coagulation factor XIa light chain	F11	24.0756	23.662	23.2718	NaN	23.8844	23.3852	24.5972	NaN	24.4433	16
P08637;Q8SPW2	P08637;Q8SPW2	Low affinity immunoglobulin gamma Fc region receptor III-A	FCGR3A	22.5923	23.0553	22.3775	24.8471	24.7932	24.7104	NaN	NaN	NaN	16
P00488	P00488	Coagulation factor XIII A chain	F13A1	24.1251	23.2088	23.3009	24.1469	24.1815	24.3283	NaN	NaN	NaN	15
P01780	P01780	Ig heavy chain V-III region JON		NaN	NaN	NaN	NaN	NaN	29.5292	NaN	NaN	NaN	15
P04180	P04180	Phosphatidylcholine-sterol acyltransferase	LCAT	24.9711	24.4211	24.3629	NaN	24.23	24.0996	24.7823	27.127	NaN	15
P25311	P25311	Zinc-alpha-2-glycoprotein	AZGP1	22.8692	22.6027	22.7938	23.2174	NaN	22.6697	23.2876	NaN	NaN	15
A0A0C4DH67;A0A0C4DH69	A0A0C4DH67;A0A0C4DH69		IGKV1-8;IGKV1-9	25.9606	26.1701	25.3968	27.2619	26.0335	25.9927	NaN	NaN	NaN	14
A0A0C4DH68	A0A0C4DH68		IGKV2-24	26.9534	26.9008	27.4077	28.1572	27.85	27.8815	NaN	NaN	NaN	14
P04211	P04211	Ig lambda chain V region 4A		28.5552	26.4314	27.3684	27.9225	28.4864	27.9449	26.7928	27.736	25.6281	14
A0A087WSY6	A0A087WSY6		IGKV3D-15	NaN	NaN	NaN	NaN	NaN	27.5589	NaN	NaN	NaN	13
A0A0C4DH24	A0A0C4DH24		IGKV6-21	24.0922	24.0771	23.7731	25.9004	25.4241	25.4761	NaN	NaN	NaN	13
P15814	P15814	Immunoglobulin lambda-like polypeptide 1	IGLL1	24.8234	25.1069	25.1895	26.5353	26.3215	26.1075	25.2698	NaN	NaN	13
A0A0B4J1Y8	A0A0B4J1Y8		IGLV9-49	25.1514	25.0517	24.7098	NaN	25.2158	25.0893	NaN	NaN	NaN	12
A0A0B4J2H0;P01742	A0A0B4J2H0;P01742	Ig heavy chain V-I region EU	IGHV1-69-2	NaN	23.5099	23.396	25.2586	25.2611	NaN	NaN	26.5033	NaN	12
P07437;P04350;P68371;Q9BVA1;Q13885;Q9ERD7;Q13509;Q3ZCM7;A6NNZ2;Q9BUF5;CON__ENSEMBL:ENSBTAP00000025008;Q9H4B7;P24637	P07437;P04350;P68371;Q9BVA1;Q13885;Q9ERD7;Q13509;Q3ZCM7;A6NNZ2;Q9BUF5	Tubulin beta chain;Tubulin beta-4A chain;Tubulin beta-4B chain;Tubulin beta-2B chain;Tubulin beta-2A chain;Tubulin beta-3 chain;Tubulin beta-8 chain;Tubulin beta-8 chain-like protein LOC260334;Tubulin beta-6 chain	TUBB;TUBB4A;TUBB4B;TUBB2B;TUBB2A;Tubb3;TUBB3;TUBB8;TUBB6	23.8804	NaN	22.9031	24.0868	24.9455	24.5867	26.1624	27.239	27.471	12
P35542	P35542	Serum amyloid A-4 protein	SAA4	24.611	28.5038	28.3018	24.8912	24.6796	24.5982	NaN	NaN	NaN	12
A0A087WSX0	A0A087WSX0		IGLV5-45	24.5027	24.2912	24.2989	25.1976	24.8544	25.1823	24.3452	NaN	NaN	11
A0A0C4DH25	A0A0C4DH25		IGKV3D-20	NaN	NaN	NaN	NaN	NaN	28.41	NaN	NaN	NaN	11
O00187	O00187	Mannan-binding lectin serine protease 2;Mannan-binding lectin serine protease 2 A chain;Mannan-binding lectin serine protease 2 B chain	MASP2	24.3149	23.9544	23.965	24.3384	24.2797	24.486	NaN	NaN	NaN	11
P00740;P00741	P00740	Coagulation factor IX;Coagulation factor IXa light chain;Coagulation factor IXa heavy chain	F9	23.7577	23.1413	23.2325	23.7129	23.6131	23.6033	NaN	NaN	NaN	11
P01817	P01817	Ig heavy chain V-II region MCE		NaN	22.1776	22.3499	NaN	25.0253	NaN	NaN	NaN	NaN	11
P22352	P22352	Glutathione peroxidase 3	GPX3	24.703	24.3403	23.9948	25.6301	24.9774	24.7574	NaN	NaN	NaN	11
A0A075B6P5;P01615	A0A075B6P5;P01615	Ig kappa chain V-II region FR	IGKV2D-28	NaN	24.6231	24.7151	26.1207	25.4952	24.8323	NaN	NaN	NaN	10
P05543;CON__Q9TT36	P05543	Thyroxine-binding globulin	SERPINA7	22.483	22.2751	22.4414	23.6786	23.3864	23.2263	NaN	NaN	NaN	10
P15169;CON__Q2KJ83	P15169	Carboxypeptidase N catalytic chain	CPN1	NaN	23.3857	23.4111	NaN	23.0871	23.0098	NaN	NaN	NaN	10
Q13790	Q13790	Apolipoprotein F	APOF	25.3855	24.7697	24.9599	NaN	24.6687	24.5425	24.7661	NaN	NaN	10
Q15582	Q15582	Transforming growth factor-beta-induced protein ig-h3	TGFBI	22.9913	23.0996	22.9067	24.4093	24.2167	24.3502	NaN	NaN	23.7598	10
Q9UHG3	Q9UHG3	Prenylcysteine oxidase 1	PCYOX1	24.1907	23.8991	23.8373	24.0647	23.3302	NaN	NaN	NaN	NaN	10
P0DOX6	P0DOX6			NaN	25.2224	26.1228	NaN	NaN	NaN	NaN	NaN	NaN	9
Q92954;Q9JM99	Q92954	Proteoglycan 4;Proteoglycan 4 C-terminal part	PRG4	NaN	22.6305	21.9574	NaN	NaN	22.3393	NaN	NaN	NaN	9
A0A075B6I0	A0A075B6I0		IGLV8-61	NaN	25.9989	26.2096	27.2255	26.8677	27.03	NaN	NaN	NaN	8
A0A0B4J1X8	A0A0B4J1X8		IGHV3-43	NaN	NaN	NaN	NaN	NaN	25.6989	NaN	NaN	NaN	8
A0A0J9YX35	A0A0J9YX35			NaN	26.8281	26.9805	26.5286	26.5748	26.7562	NaN	NaN	NaN	8
P01699	P01699	Ig lambda chain V-I region VOR		NaN	22.5242	NaN	25.081	23.3735	NaN	NaN	NaN	NaN	8
P01743	P01743	Ig heavy chain V-I region HG3		NaN	23.9832	23.8244	NaN	23.3444	23.199	NaN	NaN	NaN	8
P0DJI9;P0DJI8	P0DJI9;P0DJI8	Serum amyloid A-2 protein;Serum amyloid A-1 protein;Amyloid protein A;Serum amyloid protein A(2-104);Serum amyloid protein A(3-104);Serum amyloid protein A(2-103);Serum amyloid protein A(2-102);Serum amyloid protein A(4-101)	SAA2;SAA1	NaN	NaN	NaN	NaN	NaN	23.2551	NaN	NaN	NaN	8
P51884	P51884	Lumican	LUM	22.6542	22.1607	22.0102	NaN	22.7628	NaN	NaN	NaN	NaN	8
P55056	P55056	Apolipoprotein C-IV	APOC4	25.5574	24.8189	24.7887	NaN	NaN	23.5391	NaN	NaN	NaN	8
Q15485	Q15485	Ficolin-2	FCN2	23.7317	23.9711	23.7953	NaN	NaN	NaN	NaN	NaN	NaN	8
A0A075B6S6;P06310	A0A075B6S6;P06310	Ig kappa chain V-II region RPMI 6410	IGKV2D-30	NaN	NaN	NaN	NaN	NaN	22.3438	NaN	NaN	NaN	7
A0A0B4J1V1;P01762	A0A0B4J1V1;P01762	Ig heavy chain V-III region TRO	IGHV3-21	NaN	NaN	NaN	23.1443	23.1654	22.2774	NaN	NaN	NaN	7
A0A0C4DH33	A0A0C4DH33		IGHV1-24	NaN	23.9958	23.615	NaN	NaN	NaN	NaN	NaN	NaN	7
A0A0C4DH34	A0A0C4DH34		IGHV4-28	26.567	25.1223	24.533	27.2721	NaN	26.995	27.0989	NaN	27.133	7
A0M8Q6	A0M8Q6	Ig lambda-7 chain C region	IGLC7	NaN	NaN	NaN	NaN	NaN	25.0135	NaN	NaN	NaN	7
P01764	P01764	Ig heavy chain V-III region 23	IGHV3-23	NaN	22.888	22.768	23.7674	24.3254	23.3122	NaN	NaN	NaN	7
P0DP01	P0DP01			NaN	NaN	NaN	NaN	NaN	24.3169	NaN	NaN	NaN	7
Q9BXR6	Q9BXR6	Complement factor H-related protein 5	CFHR5	NaN	23.7422	24	NaN	NaN	NaN	NaN	NaN	NaN	7
A0A0C4DH31	A0A0C4DH31		IGHV1-18	NaN	23.1174	NaN	26.7553	24.3434	24.1065	23.3659	NaN	NaN	6
P01766	P01766	Ig heavy chain V-III region BRO		NaN	24.9366	25.1117	25.7845	NaN	NaN	NaN	NaN	NaN	6
P01767;A0A0C4DH42	P01767;A0A0C4DH42	Ig heavy chain V-III region BUT	IGHV3-66	NaN	21.7737	22.0417	22.7445	NaN	NaN	NaN	NaN	NaN	6
P11226	P11226	Mannose-binding protein C	MBL2	24.1833	23.3135	23.2155	24.3531	24.0352	23.9444	NaN	NaN	NaN	6
Q13093	Q13093	Platelet-activating factor acetylhydrolase	PLA2G7	22.6103	21.7811	21.8515	22.9558	22.8953	22.7135	NaN	NaN	NaN	6
Q6P387	Q6P387	Uncharacterized protein C16orf46	C16orf46	NaN	NaN	NaN	NaN	NaN	27.9474	NaN	NaN	NaN	6
A0A075B6Q5	A0A075B6Q5		IGHV3-64	NaN	25.1292	25.3065	NaN	NaN	NaN	NaN	NaN	NaN	5
A0A087WSZ0	A0A087WSZ0		IGKV1D-8	NaN	NaN	NaN	NaN	NaN	23.8115	NaN	NaN	NaN	5
A0A0B4J1U3	A0A0B4J1U3		IGLV1-36	NaN	NaN	NaN	NaN	NaN	23.235	NaN	NaN	NaN	5
P04278	P04278	Sex hormone-binding globulin	SHBG	NaN	22.3092	22.5911	NaN	23.2348	23.27	NaN	NaN	NaN	5
P36980	P36980	Complement factor H-related protein 2	CFHR2	24.0274	NaN	23.3047	NaN	23.8843	23.9308	NaN	NaN	NaN	5
P60201	P60201	Myelin proteolipid protein	PLP1	NaN	NaN	NaN	NaN	NaN	NaN	NaN	27.5773	NaN	5
A0A087WW87;P01614	A0A087WW87;P01614	Ig kappa chain V-II region Cum	IGKV2-40	NaN	NaN	22.1049	NaN	NaN	NaN	NaN	NaN	NaN	4
A0A0A0MT36	A0A0A0MT36		IGKV6D-21	NaN	NaN	NaN	NaN	21.5685	NaN	NaN	NaN	NaN	4
P01601	P01601	Ig kappa chain V-I region HK101		24.3714	24.2675	23.4583	24.196	NaN	24.7112	24.7139	NaN	NaN	4
P01704	P01704	Ig lambda chain V-II region TOG		NaN	NaN	23.7657	NaN	NaN	NaN	NaN	NaN	NaN	4
P01706	P01706	Ig lambda chain V-II region BOH		NaN	NaN	NaN	NaN	NaN	21.684	NaN	NaN	NaN	4
P01763	P01763	Ig heavy chain V-III region WEA		NaN	NaN	NaN	NaN	NaN	23.9691	NaN	NaN	NaN	4
P06276	P06276	Cholinesterase	BCHE	22.2823	NaN	21.7501	NaN	NaN	NaN	NaN	NaN	NaN	4
P22105;Q16473	P22105;Q16473	Tenascin-X;Putative tenascin-XA	TNXB;TNXA	NaN	NaN	20.1983	NaN	NaN	NaN	NaN	NaN	NaN	4
P98160	P98160	Basement membrane-specific heparan sulfate proteoglycan core protein;Endorepellin;LG3 peptide	HSPG2	NaN	21.0583	NaN	NaN	NaN	NaN	NaN	NaN	NaN	4
Q9Y4E1;Q641Q2	Q9Y4E1;Q641Q2	WASH complex subunit FAM21C;WASH complex subunit FAM21A	FAM21C;FAM21A	NaN	NaN	NaN	26.2607	NaN	NaN	NaN	NaN	NaN	4
Q9Y624	Q9Y624	Junctional adhesion molecule A	F11R	NaN	NaN	NaN	NaN	NaN	27.7077	NaN	NaN	NaN	4
A0A075B6H9	A0A075B6H9		IGLV4-69	NaN	NaN	NaN	NaN	NaN	21.5216	NaN	NaN	NaN	3
A0A075B6K2	A0A075B6K2		IGLV3-12	NaN	22.0799	NaN	NaN	NaN	21.9669	NaN	NaN	NaN	3
A0A0B4J1V6	A0A0B4J1V6		IGHV3-73	NaN	22.5868	22.6368	NaN	NaN	NaN	NaN	NaN	NaN	3
A0A0C4DH32	A0A0C4DH32		IGHV3-20	NaN	NaN	NaN	NaN	NaN	24.3772	NaN	NaN	NaN	3
P09535;P01346;P01344	P09535;P01346;P01344	Insulin-like growth factor II;Insulin-like growth factor II;Preptin;Insulin-like growth factor II;Insulin-like growth factor II;Insulin-like growth factor II Ala-25 Del;Preptin	Igf2;IGF2	NaN	21.4323	NaN	NaN	NaN	NaN	NaN	NaN	NaN	3
P05154	P05154	Plasma serine protease inhibitor	SERPINA5	NaN	NaN	NaN	NaN	21.9244	NaN	NaN	NaN	NaN	3
P08571	P08571	Monocyte differentiation antigen CD14;Monocyte differentiation antigen CD14, urinary form;Monocyte differentiation antigen CD14, membrane-bound form	CD14	NaN	21.8209	21.234	NaN	NaN	NaN	22.8291	NaN	NaN	3
P49908	P49908	Selenoprotein P	SEPP1	NaN	23.3975	23.5212	NaN	NaN	NaN	NaN	NaN	NaN	3
P61769	P61769	Beta-2-microglobulin;Beta-2-microglobulin form pI 5.3	B2M	NaN	NaN	NaN	NaN	NaN	22.8791	NaN	NaN	NaN	3
Q13103;Q70TH4;Q711S8	Q13103;Q70TH4;Q711S8	Secreted phosphoprotein 24	SPP2	22.1605	22.1177	21.4317	NaN	NaN	NaN	NaN	NaN	NaN	3
Q15113	Q15113	Procollagen C-endopeptidase enhancer 1	PCOLCE	21.9891	21.877	21.9287	NaN	22.1317	NaN	NaN	NaN	NaN	3
Q96SN8;Q9JLH5;Q5VU43	Q96SN8;Q9JLH5;Q5VU43	CDK5 regulatory subunit-associated protein 2;Myomegalin	Cdk5rap2;CDK5RAP2;PDE4DIP	NaN	NaN	NaN	NaN	NaN	22.2421	NaN	NaN	NaN	3
A0A0C4DH43	A0A0C4DH43			NaN	NaN	21.1518	NaN	NaN	NaN	NaN	NaN	NaN	2
P01814	P01814	Ig heavy chain V-II region OU		NaN	NaN	19.964	NaN	NaN	NaN	NaN	NaN	NaN	2
P02786	P02786	Transferrin receptor protein 1;Transferrin receptor protein 1, serum form	TFRC	NaN	NaN	NaN	NaN	NaN	21.4705	NaN	NaN	NaN	2
P22891	P22891	Vitamin K-dependent protein Z	PROZ	NaN	19.5995	NaN	NaN	NaN	NaN	NaN	NaN	NaN	2
Q6IQX0;Q9BY66;Q9UGL1;Q80Y84;P41230;P41229	Q6IQX0;Q9BY66;Q9UGL1;Q80Y84;P41230;P41229	Lysine-specific demethylase 5B-B;Lysine-specific demethylase 5D;Lysine-specific demethylase 5B;Lysine-specific demethylase 5C	kdm5bb;KDM5D;KDM5B;Kdm5b;Kdm5c;KDM5C	NaN	NaN	NaN	NaN	NaN	25.8714	NaN	NaN	NaN	2
Q9HDC9	Q9HDC9	Adipocyte plasma membrane-associated protein	APMAP	NaN	NaN	NaN	21.9928	NaN	NaN	NaN	NaN	NaN	2
Q9NZP8	Q9NZP8	Complement C1r subcomponent-like protein	C1RL	NaN	NaN	22.2669	NaN	NaN	NaN	NaN	NaN	NaN	2
Q9P2D1	Q9P2D1	Chromodomain-helicase-DNA-binding protein 7	CHD7	NaN	NaN	NaN	NaN	NaN	NaN	25.0322	NaN	NaN	2
Q9UGM5	Q9UGM5	Fetuin-B	FETUB	NaN	21.3191	NaN	NaN	NaN	NaN	NaN	NaN	NaN	2

## Sheet: Table S3
Table S3: Proteins identified in a HP EVs
Protein names	Gene names	HP-1.1	HP-1.2	HP-1.3	MS/MS count
Apolipoprotein B-100;Apolipoprotein B-48	APOB	35.1405	34.965	34.99	3080
Alpha-2-macroglobulin	A2M	35.9952	35.8355	35.7315	3053
Complement C3;Complement C3 beta chain;C3-beta-c;Complement C3 alpha chain;C3a anaphylatoxin;Acylation stimulating protein;Complement C3b alpha chain;Complement C3c alpha chain fragment 1;Complement C3dg fragment;Complement C3g fragment;Complement C3d fragment;Complement C3f fragment;Complement C3c alpha chain fragment 2	C3	35.901	35.7315	35.6761	2919
Ig gamma-1 chain C region	IGHG1	36.2761	35.6022	35.676	1453
Complement C4-A;Complement C4 beta chain;Complement C4-A alpha chain;C4a anaphylatoxin;C4b-A;C4d-A;Complement C4 gamma chain	C4A	33.5136	33.391	33.2032	1282
Immunoglobulin kappa light chain	IGK	34.5212	33.8839	33.8246	1233
Serotransferrin	TF	33.6143	33.6429	33.59	828
Ig mu chain C region	IGHM	33.9432	33.8907	33.8533	826
Apolipoprotein A-I;Proapolipoprotein A-I;Truncated apolipoprotein A-I	APOA1	34.7787	34.9342	34.7765	807
Fibronectin;Anastellin;Ugl-Y1;Ugl-Y2;Ugl-Y3	FN1	32.4328	32.2771	32.6502	744
Ig alpha-1 chain C region	IGHA1	34.016	33.7881	33.8761	721
Complement factor H	CFH	33.0217	33.1088	33.0304	701
Ig gamma-2 chain C region	IGHG2	33.1295	33.4787	33.2464	680
Ceruloplasmin	CP	31.4052	31.3817	31.3517	567
Plasminogen;Plasmin heavy chain A;Activation peptide;Angiostatin;Plasmin heavy chain A, short form;Plasmin light chain B	PLG	32.098	32.1692	32.0245	524
Complement C5;Complement C5 beta chain;Complement C5 alpha chain;C5a anaphylatoxin;Complement C5 alpha chain	C5	31.3639	31.1414	30.9643	461
Haptoglobin;Haptoglobin alpha chain;Haptoglobin beta chain	HP	33.0858	32.9132	32.8152	453
Ig lambda-6 chain C region	IGLC6	33.8961	33.2303	33.1431	411
Inter-alpha-trypsin inhibitor heavy chain H2	ITIH2	31.7406	31.693	31.5617	360
C4b-binding protein alpha chain	C4BPA	31.9124	31.7307	31.8349	346
Alpha-1-antitrypsin;Short peptide from AAT	SERPINA1	31.8138	31.8967	31.6349	344
Inter-alpha-trypsin inhibitor heavy chain H4;70 kDa inter-alpha-trypsin inhibitor heavy chain H4;35 kDa inter-alpha-trypsin inhibitor heavy chain H4	ITIH4	30.6746	30.631	30.4939	341
Inter-alpha-trypsin inhibitor heavy chain H1	ITIH1	30.7513	31.1034	30.8921	306
Fibrinogen beta chain;Fibrinopeptide B;Fibrinogen beta chain	FGB	31.8642	31.4978	31.7443	291
Ig gamma-4 chain C region	IGHG4	31.4748	31.5052	31.4146	257
Fibrinogen alpha chain;Fibrinopeptide A;Fibrinogen alpha chain	FGA	31.4555	31.358	31.4602	255
Fibrinogen gamma chain	FGG	31.6249	31.6849	31.7724	242
Ig kappa chain C region	IGKC	32.4387	32.2874	32.0694	220
Prothrombin;Activation peptide fragment 1;Activation peptide fragment 2;Thrombin light chain;Thrombin heavy chain	F2	30.2325	30.086	29.8847	216
Complement C1r subcomponent;Complement C1r subcomponent heavy chain;Complement C1r subcomponent light chain	C1R	29.661	29.6492	29.6799	216
Complement factor B;Complement factor B Ba fragment;Complement factor B Bb fragment	CFB	29.4971	29.3	29.0973	214
Histidine-rich glycoprotein	HRG	29.8984	29.5799	29.8676	210
Hemopexin	HPX	30.6803	30.7445	30.6497	208
Apolipoprotein A-IV	APOA4	29.3384	29.2598	29.1294	208
Vitamin D-binding protein	GC	28.8978	29.0344	28.9964	178
Beta-2-glycoprotein 1	APOH	29.5994	29.5991	29.4691	173
Apolipoprotein E	APOE	30.7255	30.5088	30.467	163
Complement component C7	C7	28.0599	27.911	28.081	162
Transthyretin	TTR	30.0233	30.1857	29.8906	158
Complement C1s subcomponent;Complement C1s subcomponent heavy chain;Complement C1s subcomponent light chain	C1S	29.0699	29.1358	28.9868	157
Kininogen-1;Kininogen-1 heavy chain;T-kinin;Bradykinin;Lysyl-bradykinin;Kininogen-1 light chain;Low molecular weight growth-promoting factor	KNG1	29.4295	29.1957	29.1453	154
Ig gamma-3 chain C region	IGHG3	30.8954	31.2576	31.225	153
Immunoglobulin alpha-2 heavy chain	IGA2	30.1853	30.0531	30.1709	143
CD5 antigen-like	CD5L	30.1146	30.016	30.0704	141
Complement component C8 beta chain	C8B	28.5772	28.7118	28.6637	132
Apolipoprotein(a)	LPA	29.608	29.3415	29.089	131
Ig kappa chain V-III region B6	IGKV3-20	31.1616	30.7006	30.2866	129
Apolipoprotein A-II;Proapolipoprotein A-II;Truncated apolipoprotein A-II	APOA2	31.2946	31.342	30.9316	128
Antithrombin-III	SERPINC1	28.5876	28.5559	28.5386	120
Protein AMBP;Alpha-1-microglobulin;Inter-alpha-trypsin inhibitor light chain;Trypstatin	AMBP	29.5582	28.9738	29.1464	117
Vitamin K-dependent protein S	PROS1	29.3437	29.1378	29.0938	115
Alpha-1B-glycoprotein	A1BG	28.6036	28.4087	28.6071	114
Clusterin;Clusterin beta chain;Clusterin alpha chain	CLU	29.633	28.9184	29.1067	110
Hemoglobin subunit beta;LVV-hemorphin-7;Spinorphin	HBB	28.9636	29.0096	28.8186	104
N-acetylmuramoyl-L-alanine amidase	PGLYRP2	27.7549	27.9416	27.8182	104
Complement factor I;Complement factor I heavy chain;Complement factor I light chain	CFI	27.9688	27.9646	27.911	103
Pregnancy zone protein	PZP	27.9838	27.6733	27.6497	101
Immunoglobulin lambda-like polypeptide 5;Ig lambda-1 chain C regions	IGLL5	30.5414	29.2235	29.1069	100
Complement component C6	C6	27.8088	27.8775	27.9448	97
Heparin cofactor 2	SERPIND1	28.3183	28.1794	28.1925	95
Alpha-1-antichymotrypsin;Alpha-1-antichymotrypsin His-Pro-less	SERPINA3	28.8848	28.5271	28.5037	94
Galectin-3-binding protein	LGALS3BP	26.8019	26.4582	26.3609	91
IgGFc-binding protein	FCGBP	26.5707	26.113	26.5285	89
Alpha-2-antiplasmin	SERPINF2	27.8178	28.035	28.0713	88
Alpha-2-HS-glycoprotein;Alpha-2-HS-glycoprotein chain A;Alpha-2-HS-glycoprotein chain B	AHSG	28.1296	27.784	27.8379	87
	IGKV1-27	28.2825	28.1777	27.9725	86
Ig kappa chain V-I region Daudi;Ig kappa chain V-I region DEE	IGKV1D-39	27.8323	28.0715	27.5261	84
Ficolin-3	FCN3	28.2106	27.8221	28.2329	74
Complement C1q subcomponent subunit A	C1QA	28.9525	29.0821	28.8784	73
Plasma kallikrein;Plasma kallikrein heavy chain;Plasma kallikrein light chain	KLKB1	27.7184	27.0634	27.0621	71
Complement component C9;Complement component C9a;Complement component C9b	C9	27.6432	27.0721	27.2505	69
Ig kappa chain V-IV region	IGKV4-1	29.7923	29.6211	29.1655	68
Ig kappa chain V-III region POM	IGKV3-15	30.3227	30.3364	30.0953	67
Complement component C8 gamma chain	C8G	28.2526	28.5598	28.5225	67
Inter-alpha-trypsin inhibitor heavy chain H3	ITIH3	26.0085	26.5841	26.0924	67
Complement component C8 alpha chain	C8A	27.0858	27.493	27.5029	66
Serum paraoxonase/arylesterase 1	PON1	28.6383	28.2018	28.3357	65
Afamin	AFM	26.8563	26.8008	26.7304	65
Kallistatin	SERPINA4	26.6995	27.0332	26.9882	64
Alpha-1-acid glycoprotein 1	ORM1	28.0493	27.3843	27.6543	63
Coagulation factor XIII B chain	F13B	26.4187	26.5376	26.4205	63
Insulin-like growth factor-binding protein complex acid labile subunit	IGFALS	26.5818	26.5184	26.3313	63
Immunoglobulin J chain	IGJ	30.2548	30.0614	30.0003	61
	IGLV3-9	28.7183	28.2942	28.1156	60
Vitronectin;Vitronectin V65 subunit;Vitronectin V10 subunit;Somatomedin-B	VTN	28.4062	28.4977	28.2736	60
Apolipoprotein C-III	APOC3	31.1287	30.7217	30.5143	59
Haptoglobin-related protein	HPR	28.1681	28.6181	28.4433	57
Complement C1q subcomponent subunit B	C1QB	29.2689	28.2405	29.0348	56
Apolipoprotein L1	APOL1	27.7354	27.7558	27.8181	54
	IGHV4-4	28.6292	27.8249	27.6982	52
Complement C4-B;Complement C4 beta chain;Complement C4-B alpha chain;C4a anaphylatoxin;C4b-B;C4d-B;Complement C4 gamma chain	C4B	28.0498	28.5394	28.4929	52
Ig lambda chain V-I region HA	IGLV1-47	29.6356	29.3376	29.2055	51
Complement C1q subcomponent subunit C	C1QC	29.9499	29.8417	29.7215	49
Ig delta chain C region	IGHD	27.5863	27.2512	27.3746	49
Carboxypeptidase N subunit 2	CPN2	26.0992	25.8122	25.9779	49
Angiotensinogen;Angiotensin-1;Angiotensin-2;Angiotensin-3;Angiotensin-4;Angiotensin 1-9;Angiotensin 1-7;Angiotensin 1-5;Angiotensin 1-4	AGT	26.2472	26.2542	26.0509	45
Ig kappa chain V-III region VG	IGKV3D-11	29.2225	28.7171	28.4207	45
Ig kappa chain V-I region Gal	IGKV1-17	27.2537	27.2458	26.8654	44
Ig heavy chain V-III region DOB	IGHV3-9	27.1371	28.6743	28.5954	44
Plasma protease C1 inhibitor	SERPING1	26.3287	26.6103	26.2965	44
	IGHV3-30-3	26.7366	28.9212	28.5175	44
	IGKV2D-29	31.0553	30.4137	30.1096	43
C4b-binding protein beta chain	C4BPB	27.4258	27.3639	27.2725	43
Apolipoprotein D	APOD	28.7399	28.8835	28.1214	42
Pigment epithelium-derived factor	SERPINF1	25.8895	25.4732	25.2201	42
Apolipoprotein M	APOM	27.1255	27.227	27.1193	39
Serum amyloid P-component;Serum amyloid P-component(1-203)	APCS	28.4508	27.696	27.8818	39
	IGHV5-51	27.8833	27.7035	27.7124	38
Complement factor H-related protein 1	CFHR1	27.154	26.0033	26.2033	38
Polymeric immunoglobulin receptor;Secretory component	PIGR	25.0982	24.8566	24.7747	37
Apolipoprotein C-I;Truncated apolipoprotein C-I	APOC1	28.0844	28.3189	27.8843	37
Alpha-1-acid glycoprotein 2	ORM2	26.1253	25.2782	25.8273	36
Carboxypeptidase B2	CPB2	25.9024	26.1201	26.0502	35
	IGHV3-49	26.6617	26.7748	26.648	34
	IGHV1-3	27.813	27.8885	28.2296	32
	IGHV3-15	28.7252	28.996	29.1752	31
Ig lambda chain V-III region SH	IGLV2-14	28.1289	27.3731	27.1011	31
Retinol-binding protein 4;Plasma retinol-binding protein(1-182);Plasma retinol-binding protein(1-181);Plasma retinol-binding protein(1-179);Plasma retinol-binding protein(1-176)	RBP4	25.8481	25.1585	25.4186	31
EGF-containing fibulin-like extracellular matrix protein 1	EFEMP1	24.0645	24.1504	23.8995	31
Properdin	CFP	26.0855	26.2538	25.8226	30
Ig lambda chain V-III region LOI	IGLV3-21	27.1029	27.4283	27.4062	30
von Willebrand factor;von Willebrand antigen 2	VWF	25.2775	24.4631	24.3924	29
	IGHV6-1	28.1587	27.7465	27.602	28
Ig heavy chain V-II region ARH-77;Ig heavy chain V-II region NEWM;Ig heavy chain V-II region WAH	IGHV4-61	28.2723	28.436	28.0037	28
Mannan-binding lectin serine protease 1;Mannan-binding lectin serine protease 1 heavy chain;Mannan-binding lectin serine protease 1 light chain	MASP1	25.9999	25.5434	25.8323	28
Hyaluronan-binding protein 2;Hyaluronan-binding protein 2 50 kDa heavy chain;Hyaluronan-binding protein 2 50 kDa heavy chain alternate form;Hyaluronan-binding protein 2 27 kDa light chain;Hyaluronan-binding protein 2 27 kDa light chain alternate form	HABP2	25.952	25.912	25.9778	28
Ig heavy chain V-III region CAM	IGHV3-30-5	27.2989	27.9411	28.1127	27
Coagulation factor XII;Coagulation factor XIIa heavy chain;Beta-factor XIIa part 1;Coagulation factor XIIa light chain	F12	24.9587	25.3486	24.9806	26
Ig kappa chain V-I region Wes	IGKV1-12	24.5954	24.7232	24.7793	25
Ig lambda chain V-I region NEW	IGLV1-51	24.745	25.9323	25.0943	25
Apolipoprotein C-II;Proapolipoprotein C-II	APOC2	29.5622	29.0829	29.0698	25
Hepatocyte growth factor-like protein;Hepatocyte growth factor-like protein alpha chain;Hepatocyte growth factor-like protein beta chain	MST1	25.1055	24.8861	25.1451	25
Attractin	ATRN	NaN	24.3828	24.4298	24
Ig kappa chain V-I region AU;Ig kappa chain V-I region AG	IGKV1-33	26.5324	26.1968	26.2686	24
Extracellular matrix protein 1	ECM1	25.7242	25.1893	25.7808	24
Ig lambda chain V-IV region Kern	IGLV3-27	27.469	26.8083	26.7636	23
Lipopolysaccharide-binding protein	LBP	24.1294	23.7302	23.8813	22
Phospholipid transfer protein	PLTP	23.4241	24.697	24.4152	22
Actin, cytoplasmic 2;Actin, cytoplasmic 2, N-terminally processed;Actin, cytoplasmic 1;Actin, cytoplasmic 1, N-terminally processed;Actin, gamma-enteric smooth muscle;Actin, alpha skeletal muscle;Actin, alpha cardiac muscle 1;Actin, aortic smooth muscle;POTE ankyrin domain family member E;POTE ankyrin domain family member F	ACTG1	25.6006	24.7167	24.6548	22
	IGHV3-74	27.0549	26.9413	26.668	21
Ig lambda chain V-I region NEWM	IGLV1-40	26.0542	26.1781	25.7246	21
Ig lambda chain V-VI region AR	IGLV6-57	26.4341	26.061	26.0161	21
Ig kappa chain V-I region BAN	IGKV1-16	26.209	26.557	26.1166	21
Corticosteroid-binding globulin	SERPINA6	24.2143	24.1212	24.2332	21
Myelin basic protein	MBP	24.7777	23.3676	23.1212	20
C-reactive protein;C-reactive protein(1-205)	CRP	24.0272	24.0585	24.0109	20
Leucine-rich alpha-2-glycoprotein	LRG1	23.3955	23.0994	23.2441	20
Phosphatidylinositol-glycan-specific phospholipase D	GPLD1	25.1284	25.2752	25.1027	20
Coagulation factor V;Coagulation factor V heavy chain;Coagulation factor V light chain	F5	23.5937	23.5935	23.2928	19
	IGHV3-72	26.6399	25.515	25.6792	18
	IGKV1D-13	25.0376	24.9852	24.9222	18
Adiponectin	ADIPOQ	24.3545	24.8961	24.8095	18
	IGLV3-10	27.8786	27.1599	26.5442	17
	IGHV2-26	24.606	25.0516	25.2846	17
Tubulin alpha-1C chain;Tubulin alpha-1A chain;Tubulin alpha-1B chain;Tubulin alpha-4A chain;Tubulin alpha-3E chain;Tubulin alpha-8 chain	TUBA1C	24.2267	22.8862	22.824	17
Ig heavy chain V-I region V35	IGHV1-2	NaN	26.8249	26.5491	17
Ig kappa chain V-I region HK102	IGKV1-5	26.3846	26.6023	27.133	16
Coagulation factor XI;Coagulation factor XIa heavy chain;Coagulation factor XIa light chain	F11	24.0756	23.662	23.2718	16
Low affinity immunoglobulin gamma Fc region receptor III-A	FCGR3A	22.5923	23.0553	22.3775	16
Coagulation factor XIII A chain	F13A1	24.1251	23.2088	23.3009	15
Phosphatidylcholine-sterol acyltransferase	LCAT	24.9711	24.4211	24.3629	15
Zinc-alpha-2-glycoprotein	AZGP1	22.8692	22.6027	22.7938	15
	IGKV1-8	25.9606	26.1701	25.3968	14
	IGKV2-24	26.9534	26.9008	27.4077	14
Ig lambda chain V region 4A	IGLV7-43	28.5552	26.4314	27.3684	14
	IGKV6-21	24.0922	24.0771	23.7731	13
Immunoglobulin lambda-like polypeptide 1	IGLL1	24.8234	25.1069	25.1895	13
	IGLV9-49	25.1514	25.0517	24.7098	12
Ig heavy chain V-I region EU	IGHV1-69-2	NaN	23.5099	23.396	12
Tubulin beta chain;Tubulin beta-4A chain;Tubulin beta-4B chain;Tubulin beta-2B chain;Tubulin beta-2A chain;Tubulin beta-3 chain;Tubulin beta-8 chain;Tubulin beta-8 chain-like protein LOC260334;Tubulin beta-6 chain	TUBB2B	23.8804	NaN	22.9031	12
Serum amyloid A-4 protein	SAA4	24.611	28.5038	28.3018	12
	IGLV5-45	24.5027	24.2912	24.2989	11
Mannan-binding lectin serine protease 2;Mannan-binding lectin serine protease 2 A chain;Mannan-binding lectin serine protease 2 B chain	MASP2	24.3149	23.9544	23.965	11
Coagulation factor IX;Coagulation factor IXa light chain;Coagulation factor IXa heavy chain	F9	23.7577	23.1413	23.2325	11
Ig heavy chain V-II region MCE	IGHV2-5	NaN	22.1776	22.3499	11
Glutathione peroxidase 3	GPX3	24.703	24.3403	23.9948	11
Ig kappa chain V-II region FR	IGKV2D-28	NaN	24.6231	24.7151	10
Thyroxine-binding globulin	SERPINA7	22.483	22.2751	22.4414	10
Carboxypeptidase N catalytic chain	CPN1	NaN	23.3857	23.4111	10
Apolipoprotein F	APOF	25.3855	24.7697	24.9599	10
Transforming growth factor-beta-induced protein ig-h3	TGFBI	22.9913	23.0996	22.9067	10
Prenylcysteine oxidase 1	PCYOX1	24.1907	23.8991	23.8373	10
Immunoglobulin mu heavy chain	IGM	NaN	25.2224	26.1228	9
Proteoglycan 4;Proteoglycan 4 C-terminal part	PRG4	NaN	22.6305	21.9574	9
	IGLV8-61	NaN	25.9989	26.2096	8
	IGHV3-64D	NaN	26.8281	26.9805	8
Ig lambda chain V-I region VOR	IGLV1-44	NaN	22.5242	NaN	8
Ig heavy chain V-I region HG3	IGHV1-46	NaN	23.9832	23.8244	8
Lumican	LUM	22.6542	22.1607	22.0102	8
Apolipoprotein C-IV	APOC4	25.5574	24.8189	24.7887	8
Ficolin-2	FCN2	23.7317	23.9711	23.7953	8
	IGHV1-24	NaN	23.9958	23.615	7
	IGHV4-28	26.567	25.1223	24.533	7
Ig heavy chain V-III region 23	IGHV3-23	NaN	22.888	22.768	7
Complement factor H-related protein 5	CFHR5	NaN	23.7422	24	7
	IGHV1-18	NaN	23.1174	NaN	6
Ig heavy chain V-III region BRO	IGHV3-13	NaN	24.9366	25.1117	6
Ig heavy chain V-III region BUT	IGHV3-66	NaN	21.7737	22.0417	6
Mannose-binding protein C	MBL2	24.1833	23.3135	23.2155	6
Platelet-activating factor acetylhydrolase	PLA2G7	22.6103	21.7811	21.8515	6
	IGHV3-64	NaN	25.1292	25.3065	5
Sex hormone-binding globulin	SHBG	NaN	22.3092	22.5911	5
Complement factor H-related protein 2	CFHR2	24.0274	NaN	23.3047	5
Ig kappa chain V-II region Cum	IGKV2-40	NaN	NaN	22.1049	4
Ig kappa chain V-I region HK101	IGKV1D-16	24.3714	24.2675	23.4583	4
Ig lambda chain V-II region TOG	IGLV2-14	NaN	NaN	23.7657	4
Cholinesterase	BCHE	22.2823	NaN	21.7501	4
Tenascin-X;Putative tenascin-XA	TNXB	NaN	NaN	20.1983	4
Basement membrane-specific heparan sulfate proteoglycan core protein;Endorepellin;LG3 peptide	HSPG2	NaN	21.0583	NaN	4
	IGLV3-12	NaN	22.0799	NaN	3
	IGHV3-73	NaN	22.5868	22.6368	3
Insulin-like growth factor II;Insulin-like growth factor II;Preptin;Insulin-like growth factor II;Insulin-like growth factor II;Insulin-like growth factor II Ala-25 Del;Preptin	IGF2	NaN	21.4323	NaN	3
Monocyte differentiation antigen CD14;Monocyte differentiation antigen CD14, urinary form;Monocyte differentiation antigen CD14, membrane-bound form	CD14	NaN	21.8209	21.234	3
Selenoprotein P	SEPP1	NaN	23.3975	23.5212	3
Secreted phosphoprotein 24	SPP2	22.1605	22.1177	21.4317	3
Procollagen C-endopeptidase enhancer 1	PCOLCE	21.9891	21.877	21.9287	3
	IGHV2-70D	NaN	NaN	21.1518	2
Ig heavy chain V-II region OU	IGHV2-70	NaN	NaN	19.964	2
Vitamin K-dependent protein Z	PROZ	NaN	19.5995	NaN	2
Complement C1r subcomponent-like protein	C1RL	NaN	NaN	22.2669	2
Fetuin-B	FETUB	NaN	21.3191	NaN	2

## Sheet: Table S4
Table S4: Proteins identified in a LC EVs
Protein names	Gene names	LC-1.1	LC-1.2	LC-1.3	MS/MS count
Apolipoprotein B-100;Apolipoprotein B-48	APOB	34.3754	34.4304	34.4292	3080
Alpha-2-macroglobulin	A2M	36.3852	36.5518	36.4412	3053
Complement C3;Complement C3 beta chain;C3-beta-c;Complement C3 alpha chain;C3a anaphylatoxin;Acylation stimulating protein;Complement C3b alpha chain;Complement C3c alpha chain fragment 1;Complement C3dg fragment;Complement C3g fragment;Complement C3d fragment;Complement C3f fragment;Complement C3c alpha chain fragment 2	C3	35.6925	35.6305	35.6793	2919
Ig gamma-1 chain C region	IGHG1	36.9593	36.6135	36.5964	1453
Complement C4-A;Complement C4 beta chain;Complement C4-A alpha chain;C4a anaphylatoxin;C4b-A;C4d-A;Complement C4 gamma chain	C4A	33.1114	32.8568	32.964	1282
Immunoglobulin kappa light chain	IGK	35.5135	35.2994	35.4402	1233
Serotransferrin	TF	33.7499	33.8041	33.8701	828
Ig mu chain C region	IGHM	34.8543	34.4662	34.6616	826
Apolipoprotein A-I;Proapolipoprotein A-I;Truncated apolipoprotein A-I	APOA1	34.5413	34.697	34.7024	807
Fibronectin;Anastellin;Ugl-Y1;Ugl-Y2;Ugl-Y3	FN1	32.4035	32.0671	32.3021	744
Ig alpha-1 chain C region	IGHA1	35.1469	35.0214	34.8526	721
Complement factor H	CFH	32.895	32.9159	32.795	701
Ig gamma-2 chain C region	IGHG2	33.8485	33.5405	33.5998	680
Ceruloplasmin	CP	31.4627	31.748	31.7055	567
Plasminogen;Plasmin heavy chain A;Activation peptide;Angiostatin;Plasmin heavy chain A, short form;Plasmin light chain B	PLG	31.5956	31.6584	31.5407	524
Complement C5;Complement C5 beta chain;Complement C5 alpha chain;C5a anaphylatoxin;Complement C5 alpha chain	C5	31.2825	30.9414	30.9775	461
Haptoglobin;Haptoglobin alpha chain;Haptoglobin beta chain	HP	31.4897	31.7758	31.7694	453
Ig lambda-6 chain C region	IGLC6	34.4738	34.4694	34.3625	411
Inter-alpha-trypsin inhibitor heavy chain H2	ITIH2	31.1756	31.1327	31.0004	360
C4b-binding protein alpha chain	C4BPA	31.4174	31.5365	31.4481	346
Alpha-1-antitrypsin;Short peptide from AAT	SERPINA1	32.0828	32.5518	32.4603	344
Inter-alpha-trypsin inhibitor heavy chain H4;70 kDa inter-alpha-trypsin inhibitor heavy chain H4;35 kDa inter-alpha-trypsin inhibitor heavy chain H4	ITIH4	30.3635	30.5198	30.3426	341
Inter-alpha-trypsin inhibitor heavy chain H1	ITIH1	30.1374	30.1266	29.9974	306
Fibrinogen beta chain;Fibrinopeptide B;Fibrinogen beta chain	FGB	31.5522	31.5377	31.8343	291
Ig gamma-4 chain C region	IGHG4	32.0236	31.6347	31.6218	257
Fibrinogen alpha chain;Fibrinopeptide A;Fibrinogen alpha chain	FGA	31.2941	31.6011	31.8635	255
Fibrinogen gamma chain	FGG	31.7147	31.3397	31.6997	242
Ig kappa chain C region	IGKC	33.3158	33.2445	33.071	220
Prothrombin;Activation peptide fragment 1;Activation peptide fragment 2;Thrombin light chain;Thrombin heavy chain	F2	29.812	29.8099	29.7423	216
Complement C1r subcomponent;Complement C1r subcomponent heavy chain;Complement C1r subcomponent light chain	C1R	29.6461	29.697	29.5063	216
Complement factor B;Complement factor B Ba fragment;Complement factor B Bb fragment	CFB	29.1927	29.4082	29.3445	214
Histidine-rich glycoprotein	HRG	29.6225	29.6926	29.5497	210
Hemopexin	HPX	30.5546	30.7052	30.4157	208
Apolipoprotein A-IV	APOA4	30.0632	30.3729	30.379	208
Vitamin D-binding protein	GC	28.8471	28.68	28.7069	178
Beta-2-glycoprotein 1	APOH	29.5478	29.4979	29.3863	173
Apolipoprotein E	APOE	30.5492	30.4693	30.5046	163
Complement component C7	C7	29.9041	29.9097	29.9624	162
Transthyretin	TTR	29.82	29.2752	29.1924	158
Complement C1s subcomponent;Complement C1s subcomponent heavy chain;Complement C1s subcomponent light chain	C1S	28.6153	29.0681	28.8084	157
Kininogen-1;Kininogen-1 heavy chain;T-kinin;Bradykinin;Lysyl-bradykinin;Kininogen-1 light chain;Low molecular weight growth-promoting factor	KNG1	29.5248	29.3173	29.306	154
Ig gamma-3 chain C region	IGHG3	31.5746	31.8848	31.3745	153
Immunoglobulin alpha-2 heavy chain	IGA2	31.1272	31.0566	30.9854	143
CD5 antigen-like	CD5L	30.3828	30.8823	30.8755	141
Complement component C8 beta chain	C8B	28.1587	28.3394	28.5438	132
Apolipoprotein(a)	LPA	27.3624	26.8755	26.9347	131
Ig kappa chain V-III region B6	IGKV3-20	32.3345	32.4545	32.5077	129
Apolipoprotein A-II;Proapolipoprotein A-II;Truncated apolipoprotein A-II	APOA2	30.9501	30.7934	30.7163	128
Antithrombin-III	SERPINC1	28.424	28.2626	28.313	120
Protein AMBP;Alpha-1-microglobulin;Inter-alpha-trypsin inhibitor light chain;Trypstatin	AMBP	29.4822	29.9372	29.7649	117
Vitamin K-dependent protein S	PROS1	29.0549	28.8076	28.7523	115
Alpha-1B-glycoprotein	A1BG	28.9308	28.7847	28.6649	114
Clusterin;Clusterin beta chain;Clusterin alpha chain	CLU	28.8719	29.0157	29.0701	110
Hemoglobin subunit beta;LVV-hemorphin-7;Spinorphin	HBB	30.0162	29.8482	30.1559	104
N-acetylmuramoyl-L-alanine amidase	PGLYRP2	28.0635	27.8551	27.727	104
Complement factor I;Complement factor I heavy chain;Complement factor I light chain	CFI	27.5004	27.1891	27.1785	103
Pregnancy zone protein	PZP	26.4989	26.4229	26.5376	101
Immunoglobulin lambda-like polypeptide 5;Ig lambda-1 chain C regions	IGLL5	30.5563	30.6748	31.2001	100
Complement component C6	C6	27.7498	27.83	27.4543	97
Heparin cofactor 2	SERPIND1	27.3746	27.2728	27.1695	95
Alpha-1-antichymotrypsin;Alpha-1-antichymotrypsin His-Pro-less	SERPINA3	28.9012	28.9589	28.938	94
Galectin-3-binding protein	LGALS3BP	27.8093	28.0819	28.03	91
IgGFc-binding protein	FCGBP	27.6205	27.6998	27.3975	89
Alpha-2-antiplasmin	SERPINF2	27.1298	27.1832	27.1322	88
Alpha-2-HS-glycoprotein;Alpha-2-HS-glycoprotein chain A;Alpha-2-HS-glycoprotein chain B	AHSG	28.1234	28.2041	28.1359	87
	IGKV1-27	29.7795	28.9786	28.9031	86
Ig kappa chain V-I region Daudi;Ig kappa chain V-I region DEE	IGKV1D-39	30.5001	29.4493	29.3395	84
Ficolin-3	FCN3	27.3898	27.6163	27.4073	74
Complement C1q subcomponent subunit A	C1QA	29.5699	29.2805	29.1645	73
Plasma kallikrein;Plasma kallikrein heavy chain;Plasma kallikrein light chain	KLKB1	27.2249	26.9077	26.826	71
Complement component C9;Complement component C9a;Complement component C9b	C9	28.7043	28.2712	28.5241	69
Ig kappa chain V-IV region	IGKV4-1	30.5658	30.2193	30.3213	68
Ig kappa chain V-III region POM	IGKV3-15	32.3067	31.4944	31.4893	67
Complement component C8 gamma chain	C8G	27.9865	28.2575	28.1533	67
Inter-alpha-trypsin inhibitor heavy chain H3	ITIH3	26.5712	26.5176	26.6598	67
Complement component C8 alpha chain	C8A	26.1519	26.6857	26.7572	66
Serum paraoxonase/arylesterase 1	PON1	27.6175	27.7747	27.7777	65
Afamin	AFM	26.8008	26.9164	26.8987	65
Kallistatin	SERPINA4	26.8897	26.6203	26.641	64
Alpha-1-acid glycoprotein 1	ORM1	27.45	27.9471	27.9173	63
Coagulation factor XIII B chain	F13B	26.3448	26.5297	26.2201	63
Insulin-like growth factor-binding protein complex acid labile subunit	IGFALS	25.5718	25.3588	25.5076	63
Immunoglobulin J chain	IGJ	31.3989	31.2709	31.3313	61
	IGLV3-9	29.77	29.3456	29.3649	60
Vitronectin;Vitronectin V65 subunit;Vitronectin V10 subunit;Somatomedin-B	VTN	27.9524	28.0457	28.1015	60
Apolipoprotein C-III	APOC3	29.5053	29.9441	29.9923	59
Haptoglobin-related protein	HPR	27.2912	27.1598	27.0261	57
Complement C1q subcomponent subunit B	C1QB	29.5028	29.5619	29.4169	56
Apolipoprotein L1	APOL1	26.7817	26.6264	26.7598	54
	IGHV4-4	30.1771	29.9661	29.9717	52
Complement C4-B;Complement C4 beta chain;Complement C4-B alpha chain;C4a anaphylatoxin;C4b-B;C4d-B;Complement C4 gamma chain	C4B	27.7294	27.4462	27.4133	52
Ig lambda chain V-I region HA	IGLV1-47	31.2609	30.7119	30.8215	51
Complement C1q subcomponent subunit C	C1QC	30.4615	30.0879	30.1516	49
Ig delta chain C region	IGHD	27.9691	28.1224	28.0432	49
Carboxypeptidase N subunit 2	CPN2	26.2544	25.4681	25.3311	49
Angiotensinogen;Angiotensin-1;Angiotensin-2;Angiotensin-3;Angiotensin-4;Angiotensin 1-9;Angiotensin 1-7;Angiotensin 1-5;Angiotensin 1-4	AGT	26.5979	25.9839	25.7966	45
Ig kappa chain V-III region VG	IGKV3D-11	31.3092	30.6047	30.6178	45
Ig kappa chain V-I region Gal	IGKV1-17	28.3624	27.5958	27.8617	44
Ig heavy chain V-III region DOB	IGHV3-9	28.6394	28.8772	28.7033	44
Plasma protease C1 inhibitor	SERPING1	27.1852	26.7274	26.6988	44
	IGHV3-30-3	28.3155	28.2338	27.8622	44
	IGKV2D-29	31.3413	31.4419	31.5005	43
C4b-binding protein beta chain	C4BPB	26.513	26.6671	26.6984	43
Apolipoprotein D	APOD	28.3309	28.7523	28.7369	42
Pigment epithelium-derived factor	SERPINF1	26.6429	26.3537	26.5316	42
Apolipoprotein M	APOM	26.7899	26.6595	26.722	39
Serum amyloid P-component;Serum amyloid P-component(1-203)	APCS	28.1437	27.8384	28.0645	39
	IGHV5-51	29.163	28.8704	28.5799	38
Complement factor H-related protein 1	CFHR1	26.5149	27.0154	27.0376	38
Polymeric immunoglobulin receptor;Secretory component	PIGR	26.7718	26.2766	26.4761	37
Apolipoprotein C-I;Truncated apolipoprotein C-I	APOC1	26.6897	27.3215	27.4438	37
Alpha-1-acid glycoprotein 2	ORM2	25.3917	25.6203	25.5872	36
Carboxypeptidase B2	CPB2	25.2767	24.7769	25.1707	35
	IGHV3-49	27.9495	27.7756	27.9886	34
	IGHV1-3	28.4777	29.2886	28.9522	32
	IGHV3-15	29.6158	29.7846	29.9333	31
Ig lambda chain V-III region SH	IGLV3-19	29.6306	29.4719	29.451	31
Retinol-binding protein 4;Plasma retinol-binding protein(1-182);Plasma retinol-binding protein(1-181);Plasma retinol-binding protein(1-179);Plasma retinol-binding protein(1-176)	RBP4	25.5507	25.5969	25.4844	31
EGF-containing fibulin-like extracellular matrix protein 1	EFEMP1	25.8743	25.4292	24.9627	31
Properdin	CFP	25.9472	25.833	25.8849	30
Ig lambda chain V-III region LOI	IGLV3-21	27.0675	27.3466	27.5878	30
von Willebrand factor;von Willebrand antigen 2	VWF	27.1311	26.8671	26.8368	29
	IGHV6-1	29.246	29.356	29.5565	28
Ig heavy chain V-II region ARH-77;Ig heavy chain V-II region NEWM;Ig heavy chain V-II region WAH	IGHV4-61	29.4814	29.4716	29.6596	28
Mannan-binding lectin serine protease 1;Mannan-binding lectin serine protease 1 heavy chain;Mannan-binding lectin serine protease 1 light chain	MASP1	25.4931	25.9847	25.912	28
Hyaluronan-binding protein 2;Hyaluronan-binding protein 2 50 kDa heavy chain;Hyaluronan-binding protein 2 50 kDa heavy chain alternate form;Hyaluronan-binding protein 2 27 kDa light chain;Hyaluronan-binding protein 2 27 kDa light chain alternate form	HABP2	25.3789	25.4844	25.4098	28
Ig heavy chain V-III region CAM	IGHV3-30-5	28.6683	28.7328	28.7761	27
Coagulation factor XII;Coagulation factor XIIa heavy chain;Beta-factor XIIa part 1;Coagulation factor XIIa light chain	F12	24.8069	24.3819	23.8654	26
Ig kappa chain V-I region Wes	IGKV1-12	26.2183	25.1157	24.9221	25
Ig lambda chain V-I region NEW	IGLV1-51	27.5797	26.5307	26.5757	25
Apolipoprotein C-II;Proapolipoprotein C-II	APOC2	28.0847	28.4749	28.4953	25
Hepatocyte growth factor-like protein;Hepatocyte growth factor-like protein alpha chain;Hepatocyte growth factor-like protein beta chain	MST1	25.3228	25.2017	25.1525	25
Attractin	ATRN	24.6939	24.0995	24.6055	24
Ig kappa chain V-I region AU;Ig kappa chain V-I region AG	IGKV1-33	27.682	27.8805	27.6115	24
Extracellular matrix protein 1	ECM1	25.615	25.706	25.9366	24
Ig lambda chain V-IV region Kern	IGLV3-27	27.6544	27.8323	27.6744	23
Lipopolysaccharide-binding protein	LBP	24.143	24.7052	24.8709	22
Phospholipid transfer protein	PLTP	24.6668	24.2505	24.1362	22
Actin, cytoplasmic 2;Actin, cytoplasmic 2, N-terminally processed;Actin, cytoplasmic 1;Actin, cytoplasmic 1, N-terminally processed;Actin, gamma-enteric smooth muscle;Actin, alpha skeletal muscle;Actin, alpha cardiac muscle 1;Actin, aortic smooth muscle;POTE ankyrin domain family member E;POTE ankyrin domain family member F	ACTG1	26.9267	28.6394	27.8206	22
	IGHV3-74	28.5691	28.6062	28.7842	21
Ig lambda chain V-I region NEWM	IGLV1-40	27.9134	27.2629	27.2042	21
Ig lambda chain V-VI region AR	IGLV6-57	26.2755	26.6596	26.7427	21
Ig kappa chain V-I region BAN	IGKV1-16	27.8035	26.7189	26.2829	21
Corticosteroid-binding globulin	SERPINA6	24.6708	24.1818	24.0571	21
Myelin basic protein	MBP	25.3147	24.7275	24.8899	20
C-reactive protein;C-reactive protein(1-205)	CRP	27.28	26.7563	26.6241	20
Leucine-rich alpha-2-glycoprotein	LRG1	24.237	24.5376	24.4378	20
Phosphatidylinositol-glycan-specific phospholipase D	GPLD1	24.8227	24.4067	24.2446	20
Coagulation factor V;Coagulation factor V heavy chain;Coagulation factor V light chain	F5	23.0879	23.3876	23.2928	19
	IGHV3-72	26.7262	27.0711	27.1474	18
	IGKV1D-13	26.4446	26.1298	25.5797	18
Adiponectin	ADIPOQ	24.6838	24.6943	25.0634	18
	IGLV3-10	28.3167	28.1305	28.1186	17
	IGHV2-26	24.9486	25.1183	23.9044	17
Tubulin alpha-1C chain;Tubulin alpha-1A chain;Tubulin alpha-1B chain;Tubulin alpha-4A chain;Tubulin alpha-3E chain;Tubulin alpha-8 chain	TUBA1C	24.2417	23.8632	24.7698	17
Ig heavy chain V-I region V35	IGHV1-2	27.585	27.1583	28.0096	17
Ig kappa chain V-I region HK102	IGKV1-5	28.9794	27.718	27.8288	16
Coagulation factor XI;Coagulation factor XIa heavy chain;Coagulation factor XIa light chain	F11	NaN	23.8844	23.3852	16
Low affinity immunoglobulin gamma Fc region receptor III-A	FCGR3A	24.8471	24.7932	24.7104	16
Coagulation factor XIII A chain	F13A1	24.1469	24.1815	24.3283	15
Ig heavy chain V-III region JON	IGHV3-7	NaN	NaN	29.5292	15
Phosphatidylcholine-sterol acyltransferase	LCAT	NaN	24.23	24.0996	15
Zinc-alpha-2-glycoprotein	AZGP1	23.2174	NaN	22.6697	15
	IGKV1-8	27.2619	26.0335	25.9927	14
	IGKV2-24	28.1572	27.85	27.8815	14
Ig lambda chain V region 4A	IGLV7-43	27.9225	28.4864	27.9449	14
	IGKV3D-15	NaN	NaN	27.5589	13
	IGKV6-21	25.9004	25.4241	25.4761	13
Immunoglobulin lambda-like polypeptide 1	IGLL1	26.5353	26.3215	26.1075	13
	IGLV9-49	NaN	25.2158	25.0893	12
Ig heavy chain V-I region EU	IGHV1-69-2	25.2586	25.2611	NaN	12
Tubulin beta chain;Tubulin beta-4A chain;Tubulin beta-4B chain;Tubulin beta-2B chain;Tubulin beta-2A chain;Tubulin beta-3 chain;Tubulin beta-8 chain;Tubulin beta-8 chain-like protein LOC260334;Tubulin beta-6 chain	TUBB2B	24.0868	24.9455	24.5867	12
Serum amyloid A-4 protein	SAA4	24.8912	24.6796	24.5982	12
	IGLV5-45	25.1976	24.8544	25.1823	11
	IGKV3D-20	NaN	NaN	28.41	11
Mannan-binding lectin serine protease 2;Mannan-binding lectin serine protease 2 A chain;Mannan-binding lectin serine protease 2 B chain	MASP2	24.3384	24.2797	24.486	11
Coagulation factor IX;Coagulation factor IXa light chain;Coagulation factor IXa heavy chain	F9	23.7129	23.6131	23.6033	11
Ig heavy chain V-II region MCE	IGHV2-5	NaN	25.0253	NaN	11
Glutathione peroxidase 3	GPX3	25.6301	24.9774	24.7574	11
Ig kappa chain V-II region FR	IGKV2D-28	26.1207	25.4952	24.8323	10
Thyroxine-binding globulin	SERPINA7	23.6786	23.3864	23.2263	10
Carboxypeptidase N catalytic chain	CPN1	NaN	23.0871	23.0098	10
Apolipoprotein F	APOF	NaN	24.6687	24.5425	10
Transforming growth factor-beta-induced protein ig-h3	TGFBI	24.4093	24.2167	24.3502	10
Prenylcysteine oxidase 1	PCYOX1	24.0647	23.3302	NaN	10
Proteoglycan 4;Proteoglycan 4 C-terminal part	PRG4	NaN	NaN	22.3393	9
	IGLV8-61	27.2255	26.8677	27.03	8
	IGHV3-43	NaN	NaN	25.6989	8
	IGHV3-64D	26.5286	26.5748	26.7562	8
Ig lambda chain V-I region VOR	IGLV1-44	25.081	23.3735	NaN	8
Ig heavy chain V-I region HG3	IGHV1-46	NaN	23.3444	23.199	8
Serum amyloid A-2 protein;Serum amyloid A-1 protein;Amyloid protein A;Serum amyloid protein A(2-104);Serum amyloid protein A(3-104);Serum amyloid protein A(2-103);Serum amyloid protein A(2-102);Serum amyloid protein A(4-101)	SAA2	NaN	NaN	23.2551	8
Lumican	LUM	NaN	22.7628	NaN	8
Apolipoprotein C-IV	APOC4	NaN	NaN	23.5391	8
Ig kappa chain V-II region RPMI 6410	IGKV2D-30	NaN	NaN	22.3438	7
Ig heavy chain V-III region TRO	IGHV3-21	23.1443	23.1654	22.2774	7
	IGHV4-28	27.2721	NaN	26.995	7
Ig lambda-7 chain C region	IGLC7	NaN	NaN	25.0135	7
Ig heavy chain V-III region 23	IGHV3-23	23.7674	24.3254	23.3122	7
	IGHV1-8	NaN	NaN	24.3169	7
	IGHV1-18	26.7553	24.3434	24.1065	6
Ig heavy chain V-III region BRO	IGHV3-13	25.7845	NaN	NaN	6
Ig heavy chain V-III region BUT	IGHV3-66	22.7445	NaN	NaN	6
Mannose-binding protein C	MBL2	24.3531	24.0352	23.9444	6
Platelet-activating factor acetylhydrolase	PLA2G7	22.9558	22.8953	22.7135	6
Uncharacterized protein C16orf46	C16orf46	NaN	NaN	27.9474	6
	IGKV1D-8	NaN	NaN	23.8115	5
	IGLV1-36	NaN	NaN	23.235	5
Sex hormone-binding globulin	SHBG	NaN	23.2348	23.27	5
Complement factor H-related protein 2	CFHR2	NaN	23.8843	23.9308	5
	IGKV6D-21	NaN	21.5685	NaN	4
Ig kappa chain V-I region HK101	IGKV1D-16	24.196	NaN	24.7112	4
Ig lambda chain V-II region BOH	IGLV2-11	NaN	NaN	21.684	4
Ig heavy chain V-III region WEA	IGHV3-48	NaN	NaN	23.9691	4
WASH complex subunit FAM21C;WASH complex subunit FAM21A	FAM21C	26.2607	NaN	NaN	4
Junctional adhesion molecule A	F11R	NaN	NaN	27.7077	4
	IGLV4-69	NaN	NaN	21.5216	3
	IGLV3-12	NaN	NaN	21.9669	3
	IGHV3-20	NaN	NaN	24.3772	3
Plasma serine protease inhibitor	SERPINA5	NaN	21.9244	NaN	3
Beta-2-microglobulin;Beta-2-microglobulin form pI 5.3	B2M	NaN	NaN	22.8791	3
Procollagen C-endopeptidase enhancer 1	PCOLCE	NaN	22.1317	NaN	3
CDK5 regulatory subunit-associated protein 2;Myomegalin	Cdk5rap2	NaN	NaN	22.2421	3
Transferrin receptor protein 1;Transferrin receptor protein 1, serum form	TFRC	NaN	NaN	21.4705	2
Lysine-specific demethylase 5B-B;Lysine-specific demethylase 5D;Lysine-specific demethylase 5B;Lysine-specific demethylase 5C	kdm5bb	NaN	NaN	25.8714	2
Adipocyte plasma membrane-associated protein	APMAP	21.9928	NaN	NaN	2

## Sheet: Table S5
Table S5: Proteins identified in HCC EVs
Protein names	Gene names	HCC-1.1	HCC-1.2	HCC-1.3	MS/MS count
Apolipoprotein B-100;Apolipoprotein B-48	APOB	34.3341	34.1839	34.3805	3080
Alpha-2-macroglobulin	A2M	36.137	35.3965	35.6068	3053
Complement C3;Complement C3 beta chain;C3-beta-c;Complement C3 alpha chain;C3a anaphylatoxin;Acylation stimulating protein;Complement C3b alpha chain;Complement C3c alpha chain fragment 1;Complement C3dg fragment;Complement C3g fragment;Complement C3d fragment;Complement C3f fragment;Complement C3c alpha chain fragment 2	C3	35.8028	35.6191	35.7004	2919
Ig gamma-1 chain C region	IGHG1	36.7547	35.4303	36.1689	1453
Complement C4-A;Complement C4 beta chain;Complement C4-A alpha chain;C4a anaphylatoxin;C4b-A;C4d-A;Complement C4 gamma chain	C4A	33.4406	33.5177	33.4242	1282
Immunoglobulin kappa light chain	IGK	35.9271	36.3301	36.0959	1233
Serotransferrin	TF	33.5546	33.9207	33.7372	828
Ig mu chain C region	IGHM	34.127	33.8895	33.8782	826
Apolipoprotein A-I;Proapolipoprotein A-I;Truncated apolipoprotein A-I	APOA1	34.4075	34.5166	34.871	807
Fibronectin;Anastellin;Ugl-Y1;Ugl-Y2;Ugl-Y3	FN1	32.0707	31.5814	31.8647	744
Ig alpha-1 chain C region	IGHA1	35.3959	34.8	35.1558	721
Complement factor H	CFH	32.5089	32.5368	32.4402	701
Ig gamma-2 chain C region	IGHG2	34.0839	33.9043	33.9234	680
Ceruloplasmin	CP	31.914	32.0186	32.1509	567
Plasminogen;Plasmin heavy chain A;Activation peptide;Angiostatin;Plasmin heavy chain A, short form;Plasmin light chain B	PLG	31.4056	31.5791	31.5035	524
Complement C5;Complement C5 beta chain;Complement C5 alpha chain;C5a anaphylatoxin;Complement C5 alpha chain	C5	31.2173	30.4019	30.7391	461
Haptoglobin;Haptoglobin alpha chain;Haptoglobin beta chain	HP	33.8396	33.6769	33.7654	453
Ig lambda-6 chain C region	IGLC6	34.3715	34.7222	34.4372	411
Inter-alpha-trypsin inhibitor heavy chain H2	ITIH2	31.0375	31.1439	31.0506	360
C4b-binding protein alpha chain	C4BPA	31.144	30.9625	31.0762	346
Alpha-1-antitrypsin;Short peptide from AAT	SERPINA1	32.3705	32.145	32.2706	344
Inter-alpha-trypsin inhibitor heavy chain H4;70 kDa inter-alpha-trypsin inhibitor heavy chain H4;35 kDa inter-alpha-trypsin inhibitor heavy chain H4	ITIH4	30.8385	30.9482	31.1026	341
Inter-alpha-trypsin inhibitor heavy chain H1	ITIH1	30.3533	30.6554	30.3873	306
Fibrinogen beta chain;Fibrinopeptide B;Fibrinogen beta chain	FGB	31.4988	30.7531	30.9403	291
Ig gamma-4 chain C region	IGHG4	31.1797	27.3996	30.6126	257
Fibrinogen alpha chain;Fibrinopeptide A;Fibrinogen alpha chain	FGA	30.7498	30.1613	30.1382	255
Fibrinogen gamma chain	FGG	31.2188	30.1567	30.1938	242
Ig kappa chain C region	IGKC	33.3099	32.4618	32.8953	220
Prothrombin;Activation peptide fragment 1;Activation peptide fragment 2;Thrombin light chain;Thrombin heavy chain	F2	30.0714	28.5392	29.6965	216
Complement C1r subcomponent;Complement C1r subcomponent heavy chain;Complement C1r subcomponent light chain	C1R	28.9751	28.1145	29.4837	216
Complement factor B;Complement factor B Ba fragment;Complement factor B Bb fragment	CFB	29.9706	30.0728	30.1534	214
Histidine-rich glycoprotein	HRG	29.7224	29.622	30.201	210
Hemopexin	HPX	30.4068	29.2727	29.7424	208
Apolipoprotein A-IV	APOA4	30.2696	30.1599	30.2027	208
Vitamin D-binding protein	GC	29.3803	28.6612	29.1118	178
Beta-2-glycoprotein 1	APOH	29.3957	29.1472	29.3343	173
Apolipoprotein E	APOE	31.0146	30.8366	30.8595	163
Complement component C7	C7	29.1688	28.0052	28.8752	162
Transthyretin	TTR	29.3304	28.6085	29.4971	158
Complement C1s subcomponent;Complement C1s subcomponent heavy chain;Complement C1s subcomponent light chain	C1S	28.2631	26.5638	26.5076	157
Kininogen-1;Kininogen-1 heavy chain;T-kinin;Bradykinin;Lysyl-bradykinin;Kininogen-1 light chain;Low molecular weight growth-promoting factor	KNG1	29.9269	29.9203	30.2512	154
Ig gamma-3 chain C region	IGHG3	31.1603	28.9333	29.3226	153
Immunoglobulin alpha-2 heavy chain	IGA2	31.3302	31.9258	32.1015	143
CD5 antigen-like	CD5L	29.3029	30.3255	30.1014	141
Complement component C8 beta chain	C8B	28.7034	28.6273	28.3609	132
Apolipoprotein(a)	LPA	25.7223	NaN	NaN	131
Ig kappa chain V-III region B6	IGKV3-20	32.0616	32.2468	32.2661	129
Apolipoprotein A-II;Proapolipoprotein A-II;Truncated apolipoprotein A-II	APOA2	31.2072	30.9193	31.1697	128
Antithrombin-III	SERPINC1	28.4794	28.6659	28.9753	120
Protein AMBP;Alpha-1-microglobulin;Inter-alpha-trypsin inhibitor light chain;Trypstatin	AMBP	29.8947	30.1586	30.3216	117
Vitamin K-dependent protein S	PROS1	29.1726	27.9151	28.7236	115
Alpha-1B-glycoprotein	A1BG	29.0223	29.516	29.6502	114
Clusterin;Clusterin beta chain;Clusterin alpha chain	CLU	29.8162	29.4117	29.4399	110
Hemoglobin subunit beta;LVV-hemorphin-7;Spinorphin	HBB	28.7998	29.8858	29.3058	104
N-acetylmuramoyl-L-alanine amidase	PGLYRP2	27.3037	NaN	26.1811	104
Complement factor I;Complement factor I heavy chain;Complement factor I light chain	CFI	27.5607	27.014	27.3223	103
Pregnancy zone protein	PZP	26.3123	25.8906	26.0379	101
Immunoglobulin lambda-like polypeptide 5;Ig lambda-1 chain C regions	IGLL5	31.9527	33.8216	33.2928	100
Complement component C6	C6	27.1031	25.1007	25.3328	97
Heparin cofactor 2	SERPIND1	28.8345	27.754	28.409	95
Alpha-1-antichymotrypsin;Alpha-1-antichymotrypsin His-Pro-less	SERPINA3	29.9848	30.1385	30.2824	94
Galectin-3-binding protein	LGALS3BP	27.6936	27.0243	27.9653	91
IgGFc-binding protein	FCGBP	27.1504	25.7967	26.8923	89
Alpha-2-antiplasmin	SERPINF2	27.4632	26.7251	26.5178	88
Alpha-2-HS-glycoprotein;Alpha-2-HS-glycoprotein chain A;Alpha-2-HS-glycoprotein chain B	AHSG	28.3429	28.7605	28.5222	87
	IGKV1-27	28.8037	29.0937	28.7971	86
Ig kappa chain V-I region Daudi;Ig kappa chain V-I region DEE	IGKV1D-39	28.8893	29.2366	29.3029	84
Ficolin-3	FCN3	27.0981	NaN	25.4556	74
Complement C1q subcomponent subunit A	C1QA	28.3896	28.9298	29.1039	73
Plasma kallikrein;Plasma kallikrein heavy chain;Plasma kallikrein light chain	KLKB1	27.5768	28.2324	28.1573	71
Complement component C9;Complement component C9a;Complement component C9b	C9	29.0473	29.1497	29.1616	69
Ig kappa chain V-IV region	IGKV4-1	28.7757	27.4693	28.2811	68
Ig kappa chain V-III region POM	IGKV3-15	31.0174	31.7368	31.5581	67
Complement component C8 gamma chain	C8G	28.0528	27.8961	28.267	67
Inter-alpha-trypsin inhibitor heavy chain H3	ITIH3	27.3598	27.7441	27.6806	67
Complement component C8 alpha chain	C8A	27.2859	27.2557	27.2837	66
Serum paraoxonase/arylesterase 1	PON1	28.418	28.3136	28.5551	65
Afamin	AFM	27.0443	NaN	26.7627	65
Kallistatin	SERPINA4	26.7007	26.3891	NaN	64
Alpha-1-acid glycoprotein 1	ORM1	27.3498	29.8764	28.4734	63
Coagulation factor XIII B chain	F13B	25.5721	NaN	25.9693	63
Insulin-like growth factor-binding protein complex acid labile subunit	IGFALS	25.4922	NaN	NaN	63
Immunoglobulin J chain	IGJ	31.0829	30.9745	31.1119	61
	IGLV3-9	29.2112	NaN	28.427	60
Vitronectin;Vitronectin V65 subunit;Vitronectin V10 subunit;Somatomedin-B	VTN	27.9469	29.2337	29.1426	60
Apolipoprotein C-III	APOC3	30.6472	31.6668	31.5786	59
Haptoglobin-related protein	HPR	25.8067	NaN	NaN	57
Complement C1q subcomponent subunit B	C1QB	29.2471	29.3827	27.9345	56
Apolipoprotein L1	APOL1	26.3649	26.7033	25.8886	54
	IGHV4-4	30.1358	30.2138	29.8924	52
Complement C4-B;Complement C4 beta chain;Complement C4-B alpha chain;C4a anaphylatoxin;C4b-B;C4d-B;Complement C4 gamma chain	C4B	28.2905	NaN	27.5676	52
Ig lambda chain V-I region HA	IGLV1-47	30.2836	29.877	30.1383	51
Complement C1q subcomponent subunit C	C1QC	30.0562	28.5625	28.5965	49
Ig delta chain C region	IGHD	27.6206	NaN	27.4206	49
Carboxypeptidase N subunit 2	CPN2	27.1507	26.7394	26.7834	49
Angiotensinogen;Angiotensin-1;Angiotensin-2;Angiotensin-3;Angiotensin-4;Angiotensin 1-9;Angiotensin 1-7;Angiotensin 1-5;Angiotensin 1-4	AGT	26.7095	26.9407	26.9038	45
Ig kappa chain V-III region VG	IGKV3D-11	30.0926	30.7309	30.3993	45
Ig kappa chain V-I region Gal	IGKV1-17	27.594	28.3198	27.6619	44
Ig heavy chain V-III region DOB	IGHV3-9	29.4473	NaN	NaN	44
Plasma protease C1 inhibitor	SERPING1	26.8637	NaN	26.6679	44
Variable pesada de inmunoglobulina 3-30-3	IGHV3-30-3	26.6859	27.7746	NaN	44
	IGKV2D-29	30.0044	28.7679	NaN	43
C4b-binding protein beta chain	C4BPB	28.1534	27.6979	27.7796	43
Apolipoprotein D	APOD	28.6794	26.992	27.6659	42
Pigment epithelium-derived factor	SERPINF1	26.4269	26.676	26.937	42
Apolipoprotein M	APOM	26.1538	NaN	NaN	39
Serum amyloid P-component;Serum amyloid P-component(1-203)	APCS	28.86	28.9807	28.9025	39
	IGHV5-51	28.4334	28.1056	28.3763	38
Complement factor H-related protein 1	CFHR1	26.9363	27.5493	27.616	38
Polymeric immunoglobulin receptor;Secretory component	PIGR	26.7821	26.854	26.3364	37
Apolipoprotein C-I;Truncated apolipoprotein C-I	APOC1	27.53	27.4119	28.2402	37
Alpha-1-acid glycoprotein 2	ORM2	25.8165	26.104	26.2799	36
Carboxypeptidase B2	CPB2	25.3049	NaN	NaN	35
	IGHV3-49	26.3561	NaN	NaN	34
	IGHV1-3	28.2355	28.0317	28.0526	32
	IGHV3-15	29.1736	28.4507	28.3603	31
Ig lambda chain V-III region SH	IGLV3-19	28.3125	NaN	28.3375	31
Retinol-binding protein 4;Plasma retinol-binding protein(1-182);Plasma retinol-binding protein(1-181);Plasma retinol-binding protein(1-179);Plasma retinol-binding protein(1-176)	RBP4	25.9104	NaN	25.8415	31
EGF-containing fibulin-like extracellular matrix protein 1	EFEMP1	26.1538	NaN	25.992	31
Properdin	CFP	25.9048	NaN	NaN	30
Ig lambda chain V-III region LOI	IGLV3-21	25.3404	NaN	NaN	30
von Willebrand factor;von Willebrand antigen 2	VWF	27.4782	26.3389	26.5747	29
	IGHV6-1	28.5054	NaN	NaN	28
Ig heavy chain V-II region ARH-77;Ig heavy chain V-II region NEWM;Ig heavy chain V-II region WAH	IGHV4-61	28.9434	NaN	29.6164	28
Hyaluronan-binding protein 2;Hyaluronan-binding protein 2 50 kDa heavy chain;Hyaluronan-binding protein 2 50 kDa heavy chain alternate form;Hyaluronan-binding protein 2 27 kDa light chain;Hyaluronan-binding protein 2 27 kDa light chain alternate form	HABP2	25.5437	NaN	25.0592	28
Coagulation factor XII;Coagulation factor XIIa heavy chain;Beta-factor XIIa part 1;Coagulation factor XIIa light chain	F12	NaN	25.4319	25.3125	26
Ig kappa chain V-I region Wes	IGKV1-12	NaN	NaN	25.5798	25
Ig lambda chain V-I region NEW	IGLV1-51	25.2155	NaN	26.6839	25
Apolipoprotein C-II;Proapolipoprotein C-II	APOC2	28.434	28.9941	28.4999	25
Hepatocyte growth factor-like protein;Hepatocyte growth factor-like protein alpha chain;Hepatocyte growth factor-like protein beta chain	MST1	24.5422	NaN	NaN	25
Ig kappa chain V-I region AU;Ig kappa chain V-I region AG	IGKV1-33	28.4972	28.831	28.8004	24
Extracellular matrix protein 1	ECM1	24.9137	25.8157	NaN	24
Ig lambda chain V-IV region Kern	IGLV3-27	27.9224	28.2901	28.494	23
Lipopolysaccharide-binding protein	LBP	25.0099	NaN	25.2317	22
Phospholipid transfer protein	PLTP	23.864	NaN	NaN	22
Actin, cytoplasmic 2;Actin, cytoplasmic 2, N-terminally processed;Actin, cytoplasmic 1;Actin, cytoplasmic 1, N-terminally processed;Actin, gamma-enteric smooth muscle;Actin, alpha skeletal muscle;Actin, alpha cardiac muscle 1;Actin, aortic smooth muscle;POTE ankyrin domain family member E;POTE ankyrin domain family member F	ACTG1	26.9267	28.6394	27.8206	22
	IGHV3-74	28.4914	28.6461	28.6245	21
Ig lambda chain V-I region NEWM	IGLV1-40	26.7407	26.5162	NaN	21
Ig lambda chain V-VI region AR	IGLV6-57	27.0867	NaN	26.1281	21
Ig kappa chain V-I region BAN	IGKV1-16	26.0137	NaN	NaN	21
Myelin basic protein	MBP	25.9724	28.2314	27.5095	20
C-reactive protein;C-reactive protein(1-205)	CRP	27.7163	27.5886	28.1607	20
Leucine-rich alpha-2-glycoprotein	LRG1	24.8896	NaN	25.2166	20
	IGKV1D-13	25.7815	NaN	NaN	18
Adiponectin	ADIPOQ	24.5691	NaN	NaN	18
	IGLV3-10	27.8764	NaN	NaN	17
Tubulin alpha-1C chain;Tubulin alpha-1A chain;Tubulin alpha-1B chain;Tubulin alpha-4A chain;Tubulin alpha-3E chain;Tubulin alpha-8 chain	TUBA1C	25.7955	27.7589	26.7988	17
Ig heavy chain V-I region V35	IGHV1-2	28.3844	28.9477	28.7834	17
Coagulation factor XI;Coagulation factor XIa heavy chain;Coagulation factor XIa light chain	F11	24.5972	NaN	24.4433	16
Phosphatidylcholine-sterol acyltransferase	LCAT	24.7823	27.127	NaN	15
Zinc-alpha-2-glycoprotein	AZGP1	23.2876	NaN	NaN	15
Ig lambda chain V region 4A	IGLV7-43	26.7928	27.736	25.6281	14
Immunoglobulin lambda-like polypeptide 1	IGLL1	25.2698	NaN	NaN	13
Ig heavy chain V-I region EU	IGHV1-69-2	NaN	26.5033	NaN	12
Tubulin beta chain;Tubulin beta-4A chain;Tubulin beta-4B chain;Tubulin beta-2B chain;Tubulin beta-2A chain;Tubulin beta-3 chain;Tubulin beta-8 chain;Tubulin beta-8 chain-like protein LOC260334;Tubulin beta-6 chain	TUBB2B	26.1624	27.239	27.471	12
	IGLV5-45	24.3452	NaN	NaN	11
Apolipoprotein F	APOF	24.7661	NaN	NaN	10
Transforming growth factor-beta-induced protein ig-h3	TGFBI	NaN	NaN	23.7598	10
	IGHV4-28	27.0989	NaN	27.133	7
	IGHV1-18	23.3659	NaN	NaN	6
Myelin proteolipid protein	PLP1	NaN	27.5773	NaN	5
Ig kappa chain V-I region HK101	IGKV1D-16	24.7139	NaN	NaN	4
Monocyte differentiation antigen CD14;Monocyte differentiation antigen CD14, urinary form;Monocyte differentiation antigen CD14, membrane-bound form	CD14	22.8291	NaN	NaN	3
Chromodomain-helicase-DNA-binding protein 7	CHD7	25.0322	NaN	NaN	2

## Sheet: Table S6
Table S6: Proteins identified as differentially expressed (fold change ≥1 y ≤ -1 and p < 0.05) in LC vs. HP comparison.
Up-regulate
SN	Uniprot Access. No.	Protein	Gene Name	Fold Change	p-value
1	P10643	Complement component C7	C7	1.63978	2.90945e-05
2	A0A0B4J1X5		IGHV3-74	1.49678	6.69162e-05
3	Q15582	Transforming growth factor-beta-induced protein ig-h3	TGFBI	1.05791	0.000340336
4	P02741	C-reactive protein;C-reactive protein(1-205)	CRP	2.58628	0.000401918
5	Q08380	Galectin-3-binding protein	LGALS3BP	1.16508	0.000521458
6	P06331;P0DP06;A0A0C4DH41;P01825;P01824	Ig heavy chain V-II region ARH-77;Ig heavy chain V-II region NEWM;Ig heavy chain V-II region WAH	IGHV4-61	1.03194	0.000743778
7	P01594;P01593	Ig kappa chain V-I region AU;Ig kappa chain V-I region AG	IGKV1-33	1.12374	0.000743796
8	A0A0B4J1U7		IGHV6-1	1.28212	0.000905127
9	P01833	Polymeric immunoglobulin receptor;Secretory component	PIGR	1.33002	0.00189906
10	P04275;Q28833	von Willebrand factor;von Willebrand antigen 2	VWF	1.96569	0.00225223
11	P01619	Ig kappa chain V-III region B6	IGKV3-20	1.44766	0.00253377
12	A0A075B6R2;P0DP07		IGHV4-4	1.71922	0.00349262
13	P01714	Ig lambda chain V-III region SH	IGLV3-19	1.71513	0.00392831
14	P01700	Ig lambda chain V-I region HA	IGLV1-47	1.27024	0.00439647
15	P04433;A0A0A0MRZ8	Ig kappa chain V-III region VG	IGKV3D-11	1.78883	0.0056616
16	P0DOX7	Immunoglobulin kappa light chain	IGK	1.07281	0.00697468
17	P15814	Immunoglobulin lambda-like polypeptide 1	IGLL1	1.01319	0.00927638
18	P01703	Ig lambda chain V-I region NEWM	IGLV1-40	1.20621	0.0128914
19	P01624;A0A0C4DH55	Ig kappa chain V-III region POM	IGKV3-15	1.24367	0.0156808
20	P04432;P01597	Ig kappa chain V-I region Daudi;Ig kappa chain V-I region DEE	IGKV1D-39	1.68467	0.016713
21	Q12805	EGF-containing fibulin-like extracellular matrix protein 1	EFEMP1	1.11568	0.0207707
Down-regulate
SN	Uniprot Access. No.	Protein	Gene Name	Fold Change	p-value
1	P00748	Coagulation factor XII;Coagulation factor XIIa heavy chain;Beta-factor XIIa part 1;Coagulation factor XIIa light chain	F12	-1.01287	0.0378676
2	P08697;CON__P28800	Alpha-2-antiplasmin	SERPINF2	-1.09461	0.000790632
3	P19827;CON__Q0VCM5	Inter-alpha-trypsin inhibitor heavy chain H1	ITIH1	-1.09678	0.00145424
4	P07357	Complement component C8 alpha chain	C8A	-1.09726	0.00907273
5	P0C0L5	Complement C4-B;Complement C4 beta chain;Complement C4-B alpha chain;C4a anaphylatoxin;C4b-B;C4d-B;Complement C4 gamma chain	C4B	-1.09938	0.0087608
6	P02655;P18658;P19034	Apolipoprotein C-II;Proapolipoprotein C-II	APOC2	-1.15497	0.00226663
7	P02654;P0DMA7;P0CE40;P34929;P18657;P0DPG1;P0DOA2;P0DKU8;H9FNA4;A0A096P2H7;P0DKV4;P0DKV3	Apolipoprotein C-I;Truncated apolipoprotein C-I	APOC1	-1.21251	0.00590188
8	Q96IY4	Carboxypeptidase B2	CPB2	-1.21779	0.00320543
9	P05546;CON__ENSEMBL:ENSBTAP00000018574	Heparin cofactor 2	SERPIND1	-1.22608	0.000235939
10	P02656;P18659;P19035	Apolipoprotein C-III	APOC3	-1.24265	0.00272951
11	P35858	Insulin-like growth factor-binding protein complex acid labile subunit	IGFALS	-1.26609	0.000171488
12	O14791	Apolipoprotein L1	APOL1	-1.31546	0.000149749
13	P00739	Haptoglobin-related protein	HPR	-1.51911	0.00131243
14	P00738	Haptoglobin;Haptoglobin alpha chain;Haptoglobin beta chain	HP	-1.52807	3.60347e-05
15	P20742	Pregnancy zone protein	PZP	-1.55079	6.89164e-05
16	P08519	Apolipoprotein(a)	LPA	-2.55698	0.00029388

## Sheet: Table S7
Table S7: Proteins identified as differentially expressed (fold change ≥1 y ≤ -1 and p < 0.05) in HCC vs HP comparison.
Up-regulate
SN	Uniprot Access. No.	Protein	Gene Name	Fold Change	p-value
1	P02741	C-reactive protein;C-reactive protein(1-205)	CRP	3.24147	0.00013964
2	P02686;P25188;P25274	Myelin basic protein	MBP	2.93409	0.0148597
3	Q9BQE3;Q71U36;P68363;P0DPH8;P0DPH7;P68366;Q6PEY2;Q8WQ47;Q9NY65;Q9JJZ2	Tubulin alpha-1C chain;Tubulin alpha-1A chain;Tubulin alpha-1B chain;Tubulin alpha-4A chain;Tubulin alpha-3E chain;Tubulin alpha-8 chain	TUBA1C	2.92392	0.00854193
4	P07437;P04350;P68371;Q9BVA1;Q13885;Q9ERD7;Q13509;Q3ZCM7;A6NNZ2;Q9BUF5	Tubulin beta chain;Tubulin beta-4A chain;Tubulin beta-4B chain;Tubulin beta-2B chain;Tubulin beta-2A chain;Tubulin beta-3 chain;Tubulin beta-8 chain;Tubulin beta-8 chain-like protein LOC260334;Tubulin beta-6 chain	TUBB2B	2.89131	0.0019015
5	P0DOX8;B9A064;P0CG04	Immunoglobulin lambda-like polypeptide 5;Ig lambda-1 chain C regions	IGLL5	2.85029	0.00891158
6	P63261;P60710;P60709;P86700;P63267;P68133;P68032;P62736;Q6S8J3;A5A3E0	Actin, cytoplasmic 2;Actin, cytoplasmic 2, N-terminally processed;Actin, cytoplasmic 1;Actin, cytoplasmic 1, N-terminally processed;Actin, gamma-enteric smooth muscle;Actin, alpha skeletal muscle;Actin, alpha cardiac muscle 1;Actin, aortic smooth muscle;POTE ankyrin domain family member E;POTE ankyrin domain family member F	ACTG1	2.25672	0.00753644
7	P01594;P01593	Ig kappa chain V-I region AU;Ig kappa chain V-I region AG	IGKV1-33	1.82876	3.9714e-05
8	P04275	von Willebrand factor;von Willebrand antigen 2	VWF	1.5381	0.0479043
9	P0DOX7	Immunoglobulin kappa light chain	IGK	1.49298	0.00159472
10	A0A075B6R2		IGHV4-4	1.48173	0.00843754
11	P02748	Complement component C9;Complement component C9a;Complement component C9b	C9	1.24942	0.00243961
12	P02750	Leucine-rich alpha-2-glycoprotein	LRG1	1.21543	0.00190987
13	P01833	Polymeric immunoglobulin receptor;Secretory component	PIGR	1.19949	0.00619832
14	A0A0B4J1X5		IGHV3-74	1.15108	0.000627167
15	P0DOX2	Immunoglobulin alpha-2 heavy chain	IGA2	1.10123	0.00179561
16	P04433;A0A0A0MRZ8	Ig kappa chain V-III region VG	IGKV3D-11	1.07266	0.00638674
Down-regulate
SN	Uniprot Access. No.	Protein	Gene Name	Fold Change	p-value
1	P08603	Complement factor H	CFH	-1.10648	0.00160585
2	P19823	Inter-alpha-trypsin inhibitor heavy chain H2	ITIH2	-1.13594	0.000542484
3	P02655;P18658	Apolipoprotein C-II;Proapolipoprotein C-II	APOC2	-1.14379	0.00235028
4	P00747	Plasminogen;Plasmin heavy chain A;Activation peptide;Angiostatin;Plasmin heavy chain A, short form;Plasmin light chain B	PLG	-1.14935	0.000264013
5	P02751	Fibronectin;Anastellin;Ugl-Y1;Ugl-Y2;Ugl-Y3	FN1	-1.1626	0.019783
6	P02675	Fibrinogen beta chain;Fibrinopeptide B;Fibrinogen beta chain	FGB	-1.1862	0.0346029
7	P05156	Complement factor I;Complement factor I heavy chain;Complement factor I light chain	CFI	-1.19731	0.0152215
8	Q14520	Hyaluronan-binding protein 2;Hyaluronan-binding protein 2 50 kDa heavy chain;Hyaluronan-binding protein 2 50 kDa heavy chain alternate form;Hyaluronan-binding protein 2 27 kDa light chain;Hyaluronan-binding protein 2 27 kDa light chain alternate form	HABP2	-1.23626	0.0111682
9	P04114	Apolipoprotein B-100;Apolipoprotein B-48	APOB	-1.28046	0.00221307
10	P04003	C4b-binding protein alpha chain	C4BPA	-1.31329	0.00260331
11	P00736	Complement C1r subcomponent;Complement C1r subcomponent heavy chain;Complement C1r subcomponent light chain	C1R	-1.35379	0.04825
12	P02790	Hemopexin	HPX	-1.43238	0.0375473
13	P02766	Transthyretin	TTR	-1.43597	0.0197313
14	Q96IY4	Carboxypeptidase B2	CPB2	-1.4503	0.00665867
15	P04430	Ig kappa chain V-I region BAN	IGKV1-16	-1.49395	0.0378412
16	P05160	Coagulation factor XIII B chain	F13B	-1.53743	0.0198582
17	P08697	Alpha-2-antiplasmin	SERPINF2	-1.62083	0.0190804
18	P02671	Fibrinogen alpha chain;Fibrinopeptide A;Fibrinogen alpha chain	FGA	-1.62296	0.00852742
19	P02679	Fibrinogen gamma chain	FGG	-1.71916	0.0243772
20	A0A0A0MS15		IGHV3-49	-1.8068	0.0380753
21	P06312	Ig kappa chain V-IV region	IGKV4-1	-1.89903	0.0236735
22	O14791	Apolipoprotein L1	APOL1	-1.999	0.00136437
23	P35858	Insulin-like growth factor-binding protein complex acid labile subunit	IGFALS	-2.09859	0.0192303
24	Q96PD5	N-acetylmuramoyl-L-alanine amidase	PGLYRP2	-2.16601	0.0453953
25	P20742	Pregnancy zone protein	PZP	-2.23682	0.00120354
26	P80748	Ig lambda chain V-III region LOI	IGLV3-21	-2.27611	0.00175669
27	P09871	Complement C1s subcomponent;Complement C1s subcomponent heavy chain;Complement C1s subcomponent light chain	C1S	-2.50083	0.0240824
28	P13671	Complement component C6	C6	-2.57968	0.0286678
29	O75636	Ficolin-3	FCN3	-2.82347	0.0255633
30	O95445	Apolipoprotein M	APOM	-2.87219	0.0282406
31	P00739	Haptoglobin-related protein	HPR	-3.67978	0.00257978
32	P08519	Apolipoprotein(a)	LPA	-4.86607	0.00288888

## Sheet: Table S8
Table S8: Proteins identified as differentially expressed (fold change ≥1 y ≤ -1 and p < 0.05) in HCC vs LC comparison.
Up-regulate
SN	Uniprot Access. No.	Protein	Gene Name	Fold Change	p-value
1	Q9BQE3;Q71U36;P68363;P0DPH8;P0DPH7;P68366;Q6PEY2;Q8WQ47;Q9NY65;Q9JJZ2	Tubulin alpha-1C chain;Tubulin alpha-1A chain;Tubulin alpha-1B chain;Tubulin alpha-4A chain;Tubulin alpha-3E chain;Tubulin alpha-8 chain	TUBA1C	2.213	0.011459
2	P07437;P04350;P68371;Q9BVA1;Q13885;Q9ERD7;Q13509;Q3ZCM7;A6NNZ2;Q9BUF5	Tubulin beta chain;Tubulin beta-4A chain;Tubulin beta-4B chain;Tubulin beta-2B chain;Tubulin beta-2A chain;Tubulin beta-3 chain;Tubulin beta-8 chain;Tubulin beta-8 chain-like protein LOC260334;Tubulin beta-6 chain	TUBB2B	2.13795	0.0043196
3	P02686;P25188;P25274	Myelin basic protein	MBP	1.98054	0.0250463
4	P0DOX8;B9A064;P0CG04	Immunoglobulin lambda-like polypeptide 5;Ig lambda-1 chain C regions	IGLL5	1.93217	0.0129099
5	P04180	Phosphatidylcholine-sterol acyltransferase	LCAT	1.89612	0.0458828
6	P00738	Haptoglobin;Haptoglobin alpha chain;Haptoglobin beta chain	HP	1.80249	0.000745614
7	P63261;P60710;P60709;P86700;P63267;P68133;P68032;P62736;Q6S8J3;A5A3E0	Actin, cytoplasmic 2;Actin, cytoplasmic 2, N-terminally processed;Actin, cytoplasmic 1;Actin, cytoplasmic 1, N-terminally processed;Actin, gamma-enteric smooth muscle;Actin, alpha skeletal muscle;Actin, alpha cardiac muscle 1;Actin, aortic smooth muscle;POTE ankyrin domain family member E;POTE ankyrin domain family member F	ACTG1	1.69953	0.0113599
8	P02656	Apolipoprotein C-III	APOC3	1.20383	0.00644476
Down-regulate
SN	Uniprot Access. No.	Protein	Gene Name	Fold Change	p-value
1	P01023	Alpha-2-macroglobulin	A2M	-1.02584	0.0465022
2	A0A0C4DH29		IGHV1-3	-1.0794	0.020689
3	O43866	CD5 antigen-like	CD5L	-1.08345	0.00783864
4	P01700	Ig lambda chain V-I region HA	IGLV1-47	-1.11166	0.0258891
5	P05160	Coagulation factor XIII B chain	F13B	-1.17501	0.0485122
6	A0A087WSX0		IGLV5-45	-1.30172	0.0150936
7	A0A0B4J1V0		IGHV3-15	-1.39622	0.0233025
8	P02671	Fibrinogen alpha chain;Fibrinopeptide A;Fibrinogen alpha chain	FGA	-1.5163	0.0131783
9	P10643	Complement component C7	C7	-1.52217	0.0331571
10	P15814	Immunoglobulin lambda-like polypeptide 1	IGLL1	-1.58198	0.0243871
11	P09871	Complement C1s subcomponent;Complement C1s subcomponent heavy chain;Complement C1s subcomponent light chain	C1S	-1.99893	0.0490799
12	P80748	Ig lambda chain V-III region LOI	IGLV3-21	-2.02932	0.00243374
13	P00739	Haptoglobin-related protein	HPR	-2.16067	0.0159659
14	P08519	Apolipoprotein(a)	LPA	-2.30909	0.0389395
15	P06312	Ig kappa chain V-IV region	IGKV4-1	-2.47325	0.00954308
16	A0A0A0MS15		IGHV3-49	-2.74825	0.0099144

## Sheet: Table S9
Table S9: GO enrichment (biological process) for DEPs in the pairwise comparison by using Genecodis
Comparison group LC vs HP
description	annotation_id	genes_found	input_size	term_genes	universe	pval	pval_adj	relative_enrichment	genes
complement activation, classical pathway	GO:0006958	9	35	96	18009	1.49e-13	2.31e-11	48.2384	IGHV4-61, C4B, IGHV6-1, IGHV3-74, CRP, IGHV4-4, C7, IGLL1, C8A
immunoglobulin production	GO:0002377	7	35	76	18009	1.1e-10	8.52e-09	47.3921	IGLV1-40, IGKV1D-39, IGKV3-20, IGKV3D-11, IGKV3-15, IGLV3-19, IGLV1-47
immune response	GO:0006955	11	35	481	18009	1.03e-09	5.32e-08	11.7671	IGLV1-40, IGKV1D-39, IGKV3-20, IGKV3D-11, HP, IGKV3-15, C7, IGLV3-19, IGLV1-47, IGLL1, C8A
innate immune response	GO:0045087	11	35	597	18009	9.81e-09	3.8e-07	9.48069	F12, IGHV4-61, C4B, IGHV6-1, IGHV3-74, CRP, IGHV4-4, C7, IGLL1, APOL1, C8A
negative regulation of very-low-density lipoprotein particle clearance	GO:0010916	3	35	4	18009	2.69e-08	8.33e-07	385.907	APOC3, APOC2, APOC1
chylomicron remnant clearance	GO:0034382	3	35	5	18009	6.71e-08	1.49e-06	308.726	APOC3, APOC2, APOC1
negative regulation of lipid metabolic process	GO:0045833	3	35	5	18009	6.71e-08	1.49e-06	308.726	APOC3, APOC2, APOC1
phagocytosis, recognition	GO:0006910	5	35	71	18009	2.44e-07	4.52e-06	36.2354	IGHV4-61, IGHV6-1, IGHV3-74, IGHV4-4, IGLL1
positive regulation of B cell activation	GO:0050871	5	35	72	18009	2.62e-07	4.52e-06	35.7321	IGHV4-61, IGHV6-1, IGHV3-74, IGHV4-4, IGLL1
negative regulation of receptor-mediated endocytosis	GO:0048261	3	35	8	18009	3.74e-07	5.8e-06	192.954	APOC3, APOC2, APOC1
negative regulation of endopeptidase activity	GO:0010951	6	35	154	18009	4.69e-07	6.61e-06	20.0471	C4B, SERPIND1, PZP, LPA, SERPINF2, ITIH1
phagocytosis, engulfment	GO:0006911	5	35	89	18009	7.6e-07	9.82e-06	28.9069	IGHV4-61, IGHV6-1, IGHV3-74, IGHV4-4, IGLL1
phospholipid efflux	GO:0033700	3	35	12	18009	1.46e-06	1.62e-05	128.636	APOC3, APOC2, APOC1
B cell receptor signaling pathway	GO:0050853	5	35	100	18009	1.36e-06	1.62e-05	25.7271	IGHV4-61, IGHV6-1, IGHV3-74, IGHV4-4, IGLL1
hemostasis	GO:0007599	4	35	55	18009	3.8e-06	3.93e-05	37.4213	F12, SERPIND1, CPB2, VWF
fibrinolysis	GO:0042730	3	35	18	18009	5.38e-06	5.21e-05	85.7571	F12, CPB2, SERPINF2
defense response to bacterium	GO:0042742	6	35	246	18009	7.12e-06	6.24e-05	12.5498	IGHV4-61, IGHV6-1, IGHV3-74, HP, IGHV4-4, IGLL1
adaptive immune response	GO:0002250	7	35	381	18009	7.24e-06	6.24e-05	9.45354	IGLV1-40, IGKV1D-39, IGKV3-20, IGKV3D-11, IGKV3-15, IGLV3-19, IGLV1-47
complement activation	GO:0006956	3	35	22	18009	1.01e-05	8.24e-05	70.1649	C4B, C7, C8A
lipid transport	GO:0006869	5	35	160	18009	1.36e-05	0.000105462	16.0795	LPA, APOC3, APOL1, APOC2, APOC1
zymogen activation	GO:0031638	3	35	25	18009	1.5e-05	0.000105819	61.7451	F12, HP, HPR
cholesterol efflux	GO:0033344	3	35	25	18009	1.5e-05	0.000105819	61.7451	APOC3, APOC2, APOC1
lipoprotein metabolic process	GO:0042157	3	35	26	18009	1.7e-05	0.000114268	59.3703	APOC3, APOL1, APOC1
negative regulation of cholesterol transport	GO:0032375	2	35	4	18009	2.2e-05	0.000141841	257.271	APOC2, APOC1
blood coagulation	GO:0007596	4	35	95	18009	3.36e-05	0.000208092	21.665	F12, SERPIND1, CPB2, VWF
negative regulation of plasminogen activation	GO:0010757	2	35	6	18009	5.48e-05	0.000326526	171.514	CPB2, SERPINF2
acute-phase response	GO:0006953	3	35	39	18009	5.86e-05	0.000336275	39.5802	CRP, HP, SERPINF2
negative regulation of lipoprotein lipase activity	GO:0051005	2	35	7	18009	7.66e-05	0.000423966	147.012	APOC3, APOC1
opsonization	GO:0008228	2	35	10	18009	0.000163515	0.000817577	102.909	C4B, CRP
very-low-density lipoprotein particle assembly	GO:0034379	2	35	10	18009	0.000163515	0.000817577	102.909	APOC3, APOC1
negative regulation of fibrinolysis	GO:0051918	2	35	10	18009	0.000163515	0.000817577	102.909	CPB2, SERPINF2
complement activation, alternative pathway	GO:0006957	2	35	15	18009	0.000379214	0.00183682	68.6057	C7, C8A
high-density lipoprotein particle remodeling	GO:0034375	2	35	16	18009	0.000432858	0.00197332	64.3179	APOC3, APOC1
negative regulation of fatty acid biosynthetic process	GO:0045717	2	35	16	18009	0.000432858	0.00197332	64.3179	APOC3, APOC1
reverse cholesterol transport	GO:0043691	2	35	17	18009	0.000489974	0.00216989	60.5345	APOC3, APOC2
acute inflammatory response	GO:0002526	2	35	19	18009	0.000614569	0.00264606	54.1624	HP, HPR
cytolysis	GO:0019835	2	35	20	18009	0.000682021	0.00278193	51.4543	C7, C8A
negative regulation of lipid catabolic process	GO:0050995	2	35	20	18009	0.000682021	0.00278193	51.4543	APOC3, APOC1
negative regulation of peptidase activity	GO:0010466	3	35	119	18009	0.00157802	0.00627163	12.9717	SERPIND1, SERPINF2, ITIH1
positive regulation of phospholipid catabolic process	GO:0060697	1	35	1	18009	0.00194347	0.00700554	514.543	APOC2
negative regulation of high-density lipoprotein particle clearance	GO:0010987	1	35	1	18009	0.00194347	0.00700554	514.543	APOC3
plasma lipoprotein particle remodeling	GO:0034369	1	35	1	18009	0.00194347	0.00700554	514.543	APOC1
negative regulation of phosphatidylcholine catabolic process	GO:0010900	1	35	1	18009	0.00194347	0.00700554	514.543	APOC1
triglyceride metabolic process	GO:0006641	2	35	36	18009	0.00221776	0.00763895	28.5857	APOC3, APOC1
triglyceride homeostasis	GO:0070328	2	35	36	18009	0.00221776	0.00763895	28.5857	APOC3, APOC2
immune effector process	GO:0002252	1	35	2	18009	0.00388328	0.0112325	257.271	HP
epidermal growth factor receptor signaling pathway	GO:0007173	2	35	48	18009	0.00391327	0.0112325	21.4393	PIGR, EFEMP1
positive regulation of cell death	GO:0010942	2	35	47	18009	0.00375479	0.0112325	21.8954	HP, HPR
immunoglobulin transcytosis in epithelial cells mediated by polymeric immunoglobulin receptor	GO:0002415	1	35	2	18009	0.00388328	0.0112325	257.271	PIGR
negative regulation of mononuclear cell proliferation	GO:0032945	1	35	2	18009	0.00388328	0.0112325	257.271	CRP
negative regulation of hydrogen peroxide catabolic process	GO:2000296	1	35	2	18009	0.00388328	0.0112325	257.271	HP
positive regulation of very-low-density lipoprotein particle remodeling	GO:0010902	1	35	2	18009	0.00388328	0.0112325	257.271	APOC2
plasma kallikrein-kinin cascade	GO:0002353	1	35	2	18009	0.00388328	0.0112325	257.271	F12
negative regulation of cholesterol import	GO:0060621	1	35	2	18009	0.00388328	0.0112325	257.271	APOC3
chylomicron remodeling	GO:0034371	1	35	3	18009	0.00581942	0.014787	171.514	APOC2
response to misfolded protein	GO:0051788	1	35	3	18009	0.00581942	0.014787	171.514	F12
Factor XII activation	GO:0002542	1	35	3	18009	0.00581942	0.014787	171.514	F12
maintenance of blood vessel diameter homeostasis by renin-angiotensin	GO:0002034	1	35	3	18009	0.00581942	0.014787	171.514	SERPINF2
very-low-density lipoprotein particle clearance	GO:0034447	1	35	3	18009	0.00581942	0.014787	171.514	APOC1
detection of molecule of bacterial origin	GO:0032490	1	35	3	18009	0.00581942	0.014787	171.514	C4B
triglyceride-rich lipoprotein particle remodeling	GO:0034370	1	35	3	18009	0.00581942	0.014787	171.514	APOC2
negative regulation of hepatocyte proliferation	GO:2000346	1	35	4	18009	0.0077519	0.0182052	128.636	CPB2
positive regulation of fibrinolysis	GO:0051919	1	35	4	18009	0.0077519	0.0182052	128.636	F12
negative regulation by host of viral process	GO:0044793	1	35	4	18009	0.0077519	0.0182052	128.636	CRP
negative regulation of very-low-density lipoprotein particle remodeling	GO:0010903	1	35	4	18009	0.0077519	0.0182052	128.636	APOC3
post-embryonic eye morphogenesis	GO:0048050	1	35	4	18009	0.0077519	0.0182052	128.636	EFEMP1
positive regulation of extracellular matrix constituent secretion	GO:0003331	1	35	5	18009	0.00968074	0.0214359	102.909	CPB2
Fc receptor signaling pathway	GO:0038093	1	35	5	18009	0.00968074	0.0214359	102.909	PIGR
regulation of interleukin-8 production	GO:0032677	1	35	5	18009	0.00968074	0.0214359	102.909	CRP
negative regulation of triglyceride catabolic process	GO:0010897	1	35	5	18009	0.00968074	0.0214359	102.909	APOC3
high-density lipoprotein particle clearance	GO:0034384	1	35	7	18009	0.0135275	0.0287227	73.5061	APOC2
positive regulation of apoptotic cell clearance	GO:2000427	1	35	7	18009	0.0135275	0.0287227	73.5061	C4B
regulation of cholesterol transport	GO:0032374	1	35	7	18009	0.0135275	0.0287227	73.5061	APOC1
regulation of Cdc42 protein signal transduction	GO:0032489	1	35	8	18009	0.0154454	0.0315005	64.3179	APOC3
negative regulation of oxidoreductase activity	GO:0051354	1	35	8	18009	0.0154454	0.0315005	64.3179	HP
positive regulation of plasminogen activation	GO:0010756	1	35	8	18009	0.0154454	0.0315005	64.3179	F12
cholesterol homeostasis	GO:0042632	2	35	100	18009	0.0161233	0.0324559	10.2909	APOC3, APOC2
very-low-density lipoprotein particle remodeling	GO:0034372	1	35	9	18009	0.0173597	0.0328141	57.1714	APOC2
positive regulation of transforming growth factor beta production	GO:0071636	1	35	9	18009	0.0173597	0.0328141	57.1714	SERPINF2
positive regulation of cholesterol esterification	GO:0010873	1	35	9	18009	0.0173597	0.0328141	57.1714	APOC1
positive regulation of triglyceride catabolic process	GO:0010898	1	35	9	18009	0.0173597	0.0328141	57.1714	APOC2
positive regulation of phospholipase activity	GO:0010518	1	35	9	18009	0.0173597	0.0328141	57.1714	APOC2
cholesterol metabolic process	GO:0008203	2	35	105	18009	0.0176773	0.0330118	9.80082	APOL1, APOC1
hyaluronan metabolic process	GO:0030212	1	35	10	18009	0.0192704	0.0335608	51.4543	ITIH1
negative regulation of lipid storage	GO:0010888	1	35	10	18009	0.0192704	0.0335608	51.4543	CRP
blood coagulation, intrinsic pathway	GO:0007597	1	35	10	18009	0.0192704	0.0335608	51.4543	F12
embryonic eye morphogenesis	GO:0048048	1	35	10	18009	0.0192704	0.0335608	51.4543	EFEMP1
positive regulation of lipoprotein lipase activity	GO:0051006	1	35	10	18009	0.0192704	0.0335608	51.4543	APOC2
lipid metabolic process	GO:0006629	5	35	809	18009	0.0191769	0.0335608	3.18012	LPA, APOC3, APOL1, APOC2, APOC1
regulation of complement activation	GO:0030449	1	35	11	18009	0.0211775	0.0356795	46.7766	C7
positive regulation of cell-cell adhesion mediated by cadherin	GO:2000049	1	35	11	18009	0.0211775	0.0356795	46.7766	SERPINF2
lipid catabolic process	GO:0016042	2	35	115	18009	0.0209678	0.0356795	8.94857	APOC3, APOC2
immune system process	GO:0002376	4	35	570	18009	0.023926	0.0398767	3.61083	C4B, HP, C7, C8A
negative regulation of macrophage derived foam cell differentiation	GO:0010745	1	35	13	18009	0.0249808	0.0407582	39.5802	CRP
cytolysis by host of symbiont cells	GO:0051838	1	35	13	18009	0.0249808	0.0407582	39.5802	APOL1
positive regulation of intracellular signal transduction	GO:1902533	1	35	14	18009	0.0268771	0.042948	36.7531	VWF
positive regulation of fatty acid biosynthetic process	GO:0045723	1	35	14	18009	0.0268771	0.042948	36.7531	APOC2
negative regulation of low-density lipoprotein particle clearance	GO:0010989	1	35	15	18009	0.0287698	0.0455033	34.3029	APOC3
glomerular filtration	GO:0003094	1	35	16	18009	0.030659	0.047322	32.1589	IGKV3-20
positive regulation of blood coagulation	GO:0030194	1	35	16	18009	0.030659	0.047322	32.1589	F12
proteolysis	GO:0006508	4	35	617	18009	0.0308356	0.047322	3.33577	F12, LPA, CPB2, HP
vasoconstriction	GO:0042310	1	35	19	18009	0.036305	0.0551693	27.0812	CRP
negative regulation of chondrocyte differentiation	GO:0032331	1	35	20	18009	0.0381799	0.0554562	25.7271	EFEMP1
triglyceride catabolic process	GO:0019433	1	35	20	18009	0.0381799	0.0554562	25.7271	APOC3
cell-substrate adhesion	GO:0031589	1	35	20	18009	0.0381799	0.0554562	25.7271	VWF
positive regulation of superoxide anion generation	GO:0032930	1	35	20	18009	0.0381799	0.0554562	25.7271	CRP
cell adhesion	GO:0007155	4	35	661	18009	0.0382827	0.0554562	3.11372	LGALS3BP, IGFALS, VWF, TGFBI
positive regulation of collagen biosynthetic process	GO:0032967	1	35	26	18009	0.0493551	0.0708336	19.7901	SERPINF2
protein autoprocessing	GO:0016540	1	35	27	18009	0.0512053	0.0721529	19.0571	F12
receptor clustering	GO:0043113	1	35	27	18009	0.0512053	0.0721529	19.0571	PIGR
blood vessel morphogenesis	GO:0048514	1	35	28	18009	0.053052	0.0740816	18.3765	SERPINF2
liver regeneration	GO:0097421	1	35	29	18009	0.0548952	0.0759711	17.7429	CPB2
visual perception	GO:0007601	2	35	210	18009	0.0626352	0.0859156	4.90041	EFEMP1, TGFBI
blood circulation	GO:0008015	1	35	35	18009	0.0658817	0.0895759	14.7012	LPA
retina homeostasis	GO:0001895	1	35	41	18009	0.076744	0.102546	12.5498	PIGR
detection of chemical stimulus involved in sensory perception of bitter taste	GO:0001580	1	35	41	18009	0.076744	0.102546	12.5498	PIGR
positive regulation of cell differentiation	GO:0045597	1	35	45	18009	0.0839173	0.111172	11.4343	SERPINF2
response to hydrogen peroxide	GO:0042542	1	35	46	18009	0.0857021	0.111629	11.1857	HP
response to heat	GO:0009408	1	35	46	18009	0.0857021	0.111629	11.1857	CPB2
chondrocyte differentiation	GO:0002062	1	35	49	18009	0.0910364	0.117589	10.5009	TGFBI
negative regulation of cell adhesion	GO:0007162	1	35	50	18009	0.0928077	0.118886	10.2909	TGFBI
positive regulation of stress fiber assembly	GO:0051496	1	35	52	18009	0.0963404	0.1224	9.89505	SERPINF2
cellular defense response	GO:0006968	1	35	53	18009	0.0981017	0.123624	9.70836	LGALS3BP
positive regulation of smooth muscle cell proliferation	GO:0048661	1	35	56	18009	0.103366	0.129207	9.18827	SERPINF2
antibacterial humoral response	GO:0019731	1	35	58	18009	0.106858	0.132504	8.87143	IGKV3-20
collagen fibril organization	GO:0030199	1	35	64	18009	0.117258	0.144245	8.03973	SERPINF2
chloride transmembrane transport	GO:1902476	1	35	67	18009	0.122413	0.148234	7.67974	APOL1
camera-type eye development	GO:0043010	1	35	67	18009	0.122413	0.148234	7.67974	EFEMP1
platelet activation	GO:0030168	1	35	69	18009	0.125833	0.150032	7.45714	VWF
cellular response to glucose stimulus	GO:0071333	1	35	69	18009	0.125833	0.150032	7.45714	CPB2
response to wounding	GO:0009611	1	35	74	18009	0.134328	0.158938	6.95328	VWF
protein processing	GO:0016485	1	35	75	18009	0.136018	0.159718	6.86057	F12
cellular oxidant detoxification	GO:0098869	1	35	78	18009	0.141067	0.164401	6.5967	HP
female pregnancy	GO:0007565	1	35	87	18009	0.156042	0.180496	5.91429	PZP
positive regulation of JNK cascade	GO:0046330	1	35	95	18009	0.16914	0.194198	5.41624	SERPINF2
inflammatory response	GO:0006954	2	35	413	18009	0.191236	0.217953	2.49173	C4B, CRP
defense response to Gram-positive bacterium	GO:0050830	1	35	119	18009	0.207261	0.234492	4.32389	CRP
negative regulation of catalytic activity	GO:0043086	1	35	128	18009	0.221113	0.246565	4.01987	APOC2
steroid metabolic process	GO:0008202	1	35	128	18009	0.221113	0.246565	4.01987	APOL1
peptidyl-tyrosine phosphorylation	GO:0018108	1	35	134	18009	0.230217	0.254883	3.83987	EFEMP1
chemotaxis	GO:0006935	1	35	158	18009	0.265611	0.2879	3.2566	SERPIND1
defense response	GO:0006952	1	35	157	18009	0.264168	0.2879	3.27734	HP
cell population proliferation	GO:0008283	1	35	158	18009	0.265611	0.2879	3.2566	TGFBI
extracellular matrix organization	GO:0030198	1	35	171	18009	0.284117	0.305821	3.00902	TGFBI
positive regulation of ERK1 and ERK2 cascade	GO:0070374	1	35	226	18009	0.357523	0.38218	2.27674	SERPINF2
endocytosis	GO:0006897	1	35	246	18009	0.382359	0.405929	2.09164	LGALS3BP
response to xenobiotic stimulus	GO:0009410	1	35	253	18009	0.390829	0.412099	2.03377	CPB2
angiogenesis	GO:0001525	1	35	261	18009	0.400371	0.419308	1.97143	TGFBI
regulation of catalytic activity	GO:0050790	1	35	487	18009	0.617269	0.639423	1.05656	APOC2
response to stimulus	GO:0050896	1	35	489	18009	0.618797	0.639423	1.05223	TGFBI
positive regulation of gene expression	GO:0010628	1	35	516	18009	0.638847	0.655771	0.997176	CRP
G protein-coupled receptor signaling pathway	GO:0007186	1	35	944	18009	0.848368	0.865113	0.545067	APOC3
positive regulation of transcription by RNA polymerase II	GO:0045944	1	35	1172	18009	0.905348	0.916891	0.43903	SERPINF2
signal transduction	GO:0007165	2	35	1987	18009	0.910976	0.916891	0.517909	LGALS3BP, IGFALS
regulation of transcription, DNA-templated	GO:0006355	1	35	1444	18009	0.946505	0.946505	0.356332	EFEMP1
Comparison group HCC vs HP
description	annotation_id	genes_found	input_size	term_genes	universe	pval	pval_adj	relative_enrichment	genes
complement activation, classical pathway	GO:0006958	10	41	95	18005	1.01e-14	2.58e-12	46.2259	CFI, C1R, C6, C1S, C4BPA, IGHV3-74, CRP, IGHV4-4, C9, IGHV3-49
innate immune response	GO:0045087	16	41	596	18005	8.15e-14	1.04e-11	11.7892	FGA, FGB, CFI, C1R, PGLYRP2, C6, C1S, C4BPA, IGHV3-74, CRP, FCN3, IGHV4-4, APOL1, C9, CFH, IGHV3-49
blood coagulation, fibrin clot formation	GO:0072378	5	41	7	18005	9.95e-13	8.49e-11	313.676	F13B, FGA, FN1, FGB, FGG
fibrinolysis	GO:0042730	6	41	18	18005	1.73e-12	1.11e-10	146.382	FGA, FGB, CPB2, SERPINF2, FGG, PLG
hemostasis	GO:0007599	7	41	55	18005	3.47e-11	1.77e-09	55.8914	F13B, FGA, FGB, CPB2, FGG, VWF, PLG
blood coagulation	GO:0007596	7	41	95	18005	1.77e-09	7.54e-08	32.3582	F13B, FGA, FGB, CPB2, FGG, VWF, PLG
immune system process	GO:0002376	11	41	570	18005	3.88e-08	1.42e-06	8.47475	FGA, FGB, CFI, C1R, PGLYRP2, C6, C1S, C4BPA, FCN3, C9, CFH
complement activation	GO:0006956	4	41	22	18005	1.64e-07	5.26e-06	79.8448	C6, C1S, FCN3, CFH
plasminogen activation	GO:0031639	3	41	10	18005	1.3e-06	3.03e-05	131.744	FGA, FGB, FGG
positive regulation of peptide hormone secretion	GO:0090277	3	41	10	18005	1.3e-06	3.03e-05	131.744	FGA, FGB, FGG
negative regulation of fibrinolysis	GO:0051918	3	41	10	18005	1.3e-06	3.03e-05	131.744	CPB2, SERPINF2, PLG
platelet aggregation	GO:0070527	4	41	44	18005	2.94e-06	6.27e-05	39.9224	FGA, FN1, FGB, FGG
positive regulation of heterotypic cell-cell adhesion	GO:0034116	3	41	15	18005	4.89e-06	8.95e-05	87.8293	FGA, FGB, FGG
protein polymerization	GO:0051258	3	41	15	18005	4.89e-06	8.95e-05	87.8293	FGA, FGB, FGG
proteolysis	GO:0006508	9	41	617	18005	8.07e-06	0.000137676	6.4057	LPA, CFI, C1R, CPB2, HABP2, C1S, FCN3, PLG, CFH
immune response	GO:0006955	8	41	478	18005	1.03e-05	0.000164636	7.34973	MBP, C1R, C6, IGKV4-1, IGKV3D-11, IGLV3-21, C9, IGKV1-16
regulation of complement activation, alternative pathway	GO:0030451	2	41	3	18005	1.52e-05	0.000228227	292.764	CFI, CFH
platelet activation	GO:0030168	4	41	69	18005	1.8e-05	0.000253368	25.4578	FGA, FGB, FGG, VWF
positive regulation of exocytosis	GO:0045921	3	41	23	18005	1.88e-05	0.000253368	57.28	FGA, FGB, FGG
immunoglobulin production	GO:0002377	4	41	73	18005	2.25e-05	0.000287738	24.0628	IGKV4-1, IGKV3D-11, IGLV3-21, IGKV1-16
cholesterol efflux	GO:0033344	3	41	25	18005	2.43e-05	0.000296771	52.6976	APOM, APOC2, APOB
lipoprotein metabolic process	GO:0042157	3	41	26	18005	2.75e-05	0.000319725	50.6707	APOM, APOL1, APOB
lipid transport	GO:0006869	5	41	160	18005	3.01e-05	0.000335292	13.7233	LPA, APOM, APOL1, APOC2, APOB
negative regulation of extrinsic apoptotic signaling pathway via death domain receptors	GO:1902042	3	41	28	18005	3.45e-05	0.000368116	47.0514	FGA, FGB, FGG
biological process involved in interaction with symbiont	GO:0051702	2	41	5	18005	5.04e-05	0.000511225	175.659	FN1, PLG
positive regulation of vasoconstriction	GO:0045907	3	41	32	18005	5.19e-05	0.000511225	41.17	FGA, FGB, FGG
negative regulation of endothelial cell apoptotic process	GO:2000352	3	41	36	18005	7.43e-05	0.000689834	36.5955	FGA, FGB, FGG
negative regulation of plasminogen activation	GO:0010757	2	41	6	18005	7.55e-05	0.000689834	146.382	CPB2, SERPINF2
cell-matrix adhesion	GO:0007160	4	41	103	18005	8.69e-05	0.000767323	17.0542	FGA, FN1, FGB, FGG
acute-phase response	GO:0006953	3	41	39	18005	9.46e-05	0.000807373	33.7805	FN1, CRP, SERPINF2
high-density lipoprotein particle clearance	GO:0034384	2	41	7	18005	0.000105478	0.000843827	125.47	APOM, APOC2
induction of bacterial agglutination	GO:0043152	2	41	7	18005	0.000105478	0.000843827	125.47	FGA, FGB
positive regulation of substrate adhesion-dependent cell spreading	GO:1900026	3	41	43	18005	0.000126958	0.000984889	30.6381	FGA, FGB, FGG
positive regulation of protein secretion	GO:0050714	3	41	50	18005	0.000199417	0.0014586	26.3488	FGA, FGB, FGG
adaptive immune response	GO:0002250	6	41	378	18005	0.000198794	0.0014586	6.97058	FGA, FGB, IGKV4-1, IGKV3D-11, IGLV3-21, IGKV1-16
response to calcium ion	GO:0051592	3	41	56	18005	0.000279373	0.00198665	23.5257	FGA, FGB, FGG
negative regulation of endopeptidase activity	GO:0010951	4	41	154	18005	0.000407447	0.00281909	11.4064	PZP, LPA, ITIH2, SERPINF2
complement activation, alternative pathway	GO:0006957	2	41	15	18005	0.000521337	0.00351216	58.5528	C9, CFH
phagocytosis, recognition	GO:0006910	3	41	70	18005	0.000539633	0.00354221	18.8206	IGHV3-74, IGHV4-4, IGHV3-49
positive regulation of B cell activation	GO:0050871	3	41	71	18005	0.000562552	0.00360034	18.5555	IGHV3-74, IGHV4-4, IGHV3-49
reverse cholesterol transport	GO:0043691	2	41	17	18005	0.00067331	0.00420408	51.6643	APOM, APOC2
cytolysis	GO:0019835	2	41	20	18005	0.000936593	0.00570876	43.9146	C6, C9
phagocytosis, engulfment	GO:0006911	3	41	88	18005	0.00105152	0.0062602	14.9709	IGHV3-74, IGHV4-4, IGHV3-49
zymogen activation	GO:0031638	2	41	25	18005	0.00146821	0.00840332	35.1317	C1R, HPR
B cell receptor signaling pathway	GO:0050853	3	41	99	18005	0.00147715	0.00840332	13.3075	IGHV3-74, IGHV4-4, IGHV3-49
cholesterol homeostasis	GO:0042632	3	41	100	18005	0.00152044	0.00846155	13.1744	APOM, APOC2, APOB
positive regulation of ERK1 and ERK2 cascade	GO:0070374	4	41	226	18005	0.00170086	0.00926426	7.7725	FGA, FGB, SERPINF2, FGG
peptide cross-linking	GO:0018149	2	41	29	18005	0.00197557	0.0105364	30.286	F13B, FN1
negative regulation of blood coagulation, common pathway	GO:2000261	1	41	1	18005	0.00227714	0.0112106	439.146	FGA
cell killing	GO:0001906	1	41	1	18005	0.00227714	0.0112106	439.146	C9
positive regulation of phospholipid catabolic process	GO:0060697	1	41	1	18005	0.00227714	0.0112106	439.146	APOC2
positive regulation of response to interferon-gamma	GO:0060332	1	41	1	18005	0.00227714	0.0112106	439.146	HPX
immunoglobulin transcytosis in epithelial cells mediated by polymeric immunoglobulin receptor	GO:0002415	1	41	2	18005	0.00454923	0.017917	219.573	PIGR
negative regulation of mononuclear cell proliferation	GO:0032945	1	41	2	18005	0.00454923	0.017917	219.573	CRP
mononuclear cell migration	GO:0071674	1	41	2	18005	0.00454923	0.017917	219.573	PLG
positive regulation of very-low-density lipoprotein particle remodeling	GO:0010902	1	41	2	18005	0.00454923	0.017917	219.573	APOC2
biological process involved in interaction with host	GO:0051701	1	41	2	18005	0.00454923	0.017917	219.573	PGLYRP2
protein-containing complex assembly	GO:0065003	3	41	143	18005	0.00419361	0.017917	9.21286	FGA, FGB, FGG
regulation of opsonization	GO:1903027	1	41	2	18005	0.00454923	0.017917	219.573	C4BPA
peptide amidation	GO:0001519	1	41	2	18005	0.00454923	0.017917	219.573	PGLYRP2
negative regulation of natural killer cell differentiation involved in immune response	GO:0032827	1	41	2	18005	0.00454923	0.017917	219.573	PGLYRP2
platelet maturation	GO:0036345	1	41	2	18005	0.00454923	0.017917	219.573	FGG
cellular response to prostaglandin stimulus	GO:0071379	1	41	2	18005	0.00454923	0.017917	219.573	APOB
blood coagulation, common pathway	GO:0072377	1	41	2	18005	0.00454923	0.017917	219.573	FGA
negative regulation of RNA biosynthetic process	GO:1902679	1	41	2	18005	0.00454923	0.017917	219.573	FCN3
negative regulation of plasma lipoprotein oxidation	GO:0034445	1	41	3	18005	0.00681627	0.024577	146.382	APOM
triglyceride-rich lipoprotein particle remodeling	GO:0034370	1	41	3	18005	0.00681627	0.024577	146.382	APOC2
positive regulation of substrate-dependent cell migration, cell attachment to substrate	GO:1904237	1	41	3	18005	0.00681627	0.024577	146.382	FN1
maintenance of blood vessel diameter homeostasis by renin-angiotensin	GO:0002034	1	41	3	18005	0.00681627	0.024577	146.382	SERPINF2
negative regulation of monocyte activation	GO:0150102	1	41	3	18005	0.00681627	0.024577	146.382	FN1
chylomicron remodeling	GO:0034371	1	41	3	18005	0.00681627	0.024577	146.382	APOC2
trans-synaptic signaling by BDNF, modulating synaptic transmission	GO:0099183	1	41	4	18005	0.00907827	0.0286918	109.787	PLG
negative regulation of very-low-density lipoprotein particle clearance	GO:0010916	1	41	4	18005	0.00907827	0.0286918	109.787	APOC2
positive regulation of fibrinolysis	GO:0051919	1	41	4	18005	0.00907827	0.0286918	109.787	PLG
negative regulation of transforming growth factor beta production	GO:0071635	1	41	4	18005	0.00907827	0.0286918	109.787	FN1
negative regulation of cholesterol transport	GO:0032375	1	41	4	18005	0.00907827	0.0286918	109.787	APOC2
negative regulation of hepatocyte proliferation	GO:2000346	1	41	4	18005	0.00907827	0.0286918	109.787	CPB2
cell-substrate junction assembly	GO:0007044	1	41	4	18005	0.00907827	0.0286918	109.787	FN1
calcium-independent cell-matrix adhesion	GO:0007161	1	41	4	18005	0.00907827	0.0286918	109.787	FN1
triglyceride mobilization	GO:0006642	1	41	4	18005	0.00907827	0.0286918	109.787	APOB
negative regulation by host of viral process	GO:0044793	1	41	4	18005	0.00907827	0.0286918	109.787	CRP
response to symbiotic bacterium	GO:0009609	1	41	5	18005	0.0113352	0.0326047	87.8293	C4BPA
lipoprotein catabolic process	GO:0042159	1	41	5	18005	0.0113352	0.0326047	87.8293	APOB
regulation of interleukin-8 production	GO:0032677	1	41	5	18005	0.0113352	0.0326047	87.8293	CRP
chylomicron remnant clearance	GO:0034382	1	41	5	18005	0.0113352	0.0326047	87.8293	APOC2
positive regulation of extracellular matrix constituent secretion	GO:0003331	1	41	5	18005	0.0113352	0.0326047	87.8293	CPB2
hemoglobin metabolic process	GO:0020027	1	41	5	18005	0.0113352	0.0326047	87.8293	HPX
negative regulation of lipid metabolic process	GO:0045833	1	41	5	18005	0.0113352	0.0326047	87.8293	APOC2
Fc receptor signaling pathway	GO:0038093	1	41	5	18005	0.0113352	0.0326047	87.8293	PIGR
response to wounding	GO:0009611	2	41	74	18005	0.0123209	0.035046	11.8688	FN1, VWF
positive regulation of interferon-gamma-mediated signaling pathway	GO:0060335	1	41	6	18005	0.0135872	0.035859	73.1911	HPX
positive regulation of humoral immune response mediated by circulating immunoglobulin	GO:0002925	1	41	6	18005	0.0135872	0.035859	73.1911	HPX
lipoprotein biosynthetic process	GO:0042158	1	41	6	18005	0.0135872	0.035859	73.1911	APOB
heme metabolic process	GO:0042168	1	41	6	18005	0.0135872	0.035859	73.1911	HPX
purine nucleobase metabolic process	GO:0006144	1	41	6	18005	0.0135872	0.035859	73.1911	TTR
neural crest cell migration involved in autonomic nervous system development	GO:1901166	1	41	6	18005	0.0135872	0.035859	73.1911	FN1
peptidoglycan catabolic process	GO:0009253	1	41	6	18005	0.0135872	0.035859	73.1911	PGLYRP2
cellular response to interleukin-1	GO:0071347	2	41	81	18005	0.0146324	0.0382233	10.8431	FGB, FGG
axon ensheathment	GO:0008366	1	41	7	18005	0.0158342	0.0393548	62.7352	MBP
response to mercury ion	GO:0046689	1	41	7	18005	0.0158342	0.0393548	62.7352	MBP
recognition of apoptotic cell	GO:0043654	1	41	7	18005	0.0158342	0.0393548	62.7352	FCN3
positive regulation of metalloendopeptidase activity	GO:1904685	1	41	7	18005	0.0158342	0.0393548	62.7352	MBP
regulation of complement-dependent cytotoxicity	GO:1903659	1	41	7	18005	0.0158342	0.0393548	62.7352	CFH
cell adhesion	GO:0007155	5	41	661	18005	0.0165222	0.0406701	3.32183	FN1, FGB, IGFALS, HABP2, VWF
positive regulation of cholesterol storage	GO:0010886	1	41	8	18005	0.0180761	0.0422146	54.8933	APOB
heme transport	GO:0015886	1	41	8	18005	0.0180761	0.0422146	54.8933	HPX
defense response to bacterium	GO:0042742	3	41	245	18005	0.0181391	0.0422146	5.3773	IGHV3-74, IGHV4-4, IGHV3-49
negative regulation of complement activation, classical pathway	GO:0045959	1	41	8	18005	0.0180761	0.0422146	54.8933	C4BPA
regulation of cholesterol biosynthetic process	GO:0045540	1	41	8	18005	0.0180761	0.0422146	54.8933	APOB
negative regulation of receptor-mediated endocytosis	GO:0048261	1	41	8	18005	0.0180761	0.0422146	54.8933	APOC2
positive regulation of transforming growth factor beta production	GO:0071636	1	41	9	18005	0.0203131	0.0452187	48.794	SERPINF2
cellular response to leptin stimulus	GO:0044320	1	41	9	18005	0.0203131	0.0452187	48.794	FGB
positive regulation of triglyceride catabolic process	GO:0010898	1	41	9	18005	0.0203131	0.0452187	48.794	APOC2
very-low-density lipoprotein particle remodeling	GO:0034372	1	41	9	18005	0.0203131	0.0452187	48.794	APOC2
positive regulation of phospholipase activity	GO:0010518	1	41	9	18005	0.0203131	0.0452187	48.794	APOC2
positive regulation of lipoprotein lipase activity	GO:0051006	1	41	10	18005	0.0225451	0.0454452	43.9146	APOC2
negative regulation of cell-cell adhesion mediated by cadherin	GO:2000048	1	41	10	18005	0.0225451	0.0454452	43.9146	PLG
complement activation, lectin pathway	GO:0001867	1	41	10	18005	0.0225451	0.0454452	43.9146	FCN3
opsonization	GO:0008228	1	41	10	18005	0.0225451	0.0454452	43.9146	CRP
tissue remodeling	GO:0048771	1	41	10	18005	0.0225451	0.0454452	43.9146	PLG
negative regulation of lipid storage	GO:0010888	1	41	10	18005	0.0225451	0.0454452	43.9146	CRP
integrin activation	GO:0033622	1	41	10	18005	0.0225451	0.0454452	43.9146	FN1
positive regulation of chemokine (C-X-C motif) ligand 2 production	GO:2000343	1	41	10	18005	0.0225451	0.0454452	43.9146	MBP
regulation of protein metabolic process	GO:0051246	1	41	10	18005	0.0225451	0.0454452	43.9146	HPX
hyaluronan metabolic process	GO:0030212	1	41	10	18005	0.0225451	0.0454452	43.9146	ITIH2
very-low-density lipoprotein particle assembly	GO:0034379	1	41	10	18005	0.0225451	0.0454452	43.9146	APOB
thyroid hormone transport	GO:0070327	1	41	10	18005	0.0225451	0.0454452	43.9146	TTR
cholesterol metabolic process	GO:0008203	2	41	105	18005	0.0238283	0.0476567	8.36469	APOL1, APOB
response to carbohydrate	GO:0009743	1	41	11	18005	0.0247721	0.0476817	39.9224	APOB
positive regulation of opsonization	GO:1903028	1	41	11	18005	0.0247721	0.0476817	39.9224	FCN3
regulation of complement activation	GO:0030449	1	41	11	18005	0.0247721	0.0476817	39.9224	CFH
negative regulation of heterotypic cell-cell adhesion	GO:0034115	1	41	11	18005	0.0247721	0.0476817	39.9224	MBP
positive regulation of cell-cell adhesion mediated by cadherin	GO:2000049	1	41	11	18005	0.0247721	0.0476817	39.9224	SERPINF2
negative regulation of axonogenesis	GO:0050771	1	41	12	18005	0.0269942	0.049716	36.5955	MBP
detection of bacterium	GO:0016045	1	41	12	18005	0.0269942	0.049716	36.5955	PGLYRP2
negative regulation of platelet aggregation	GO:0090331	1	41	12	18005	0.0269942	0.049716	36.5955	FGG
phospholipid efflux	GO:0033700	1	41	12	18005	0.0269942	0.049716	36.5955	APOC2
response to selenium ion	GO:0010269	1	41	12	18005	0.0269942	0.049716	36.5955	APOB
high-density lipoprotein particle assembly	GO:0034380	1	41	12	18005	0.0269942	0.049716	36.5955	APOM
lipid catabolic process	GO:0016042	2	41	115	18005	0.0282029	0.051571	7.63733	APOC2, APOB
cytolysis by host of symbiont cells	GO:0051838	1	41	13	18005	0.0292114	0.0526628	33.7805	APOL1
negative regulation of macrophage derived foam cell differentiation	GO:0010745	1	41	13	18005	0.0292114	0.0526628	33.7805	CRP
defense response to Gram-positive bacterium	GO:0050830	2	41	119	18005	0.0300366	0.0533984	7.38061	PGLYRP2, CRP
negative regulation of peptidase activity	GO:0010466	2	41	119	18005	0.0300366	0.0533984	7.38061	ITIH2, SERPINF2
positive regulation of intracellular signal transduction	GO:1902533	1	41	14	18005	0.0314236	0.0543544	31.3676	VWF
positive regulation of fatty acid biosynthetic process	GO:0045723	1	41	14	18005	0.0314236	0.0543544	31.3676	APOC2
low-density lipoprotein particle clearance	GO:0034383	1	41	14	18005	0.0314236	0.0543544	31.3676	APOB
positive regulation of lipid storage	GO:0010884	1	41	14	18005	0.0314236	0.0543544	31.3676	APOB
trophoblast giant cell differentiation	GO:0060707	1	41	15	18005	0.0336309	0.0573968	29.2764	PLG
positive regulation of peptidase activity	GO:0010952	1	41	15	18005	0.0336309	0.0573968	29.2764	FN1
steroid metabolic process	GO:0008202	2	41	128	18005	0.0343309	0.0582034	6.86166	APOL1, APOB
high-density lipoprotein particle remodeling	GO:0034375	1	41	16	18005	0.0358333	0.0599564	27.4466	APOM
low-density lipoprotein particle remodeling	GO:0034374	1	41	16	18005	0.0358333	0.0599564	27.4466	APOB
myoblast differentiation	GO:0045445	1	41	17	18005	0.0380308	0.0632201	25.8321	PLG
cellular response to interleukin-6	GO:0071354	1	41	18	18005	0.0402234	0.0660077	24.397	FGG
negative regulation of cell-substrate adhesion	GO:0010812	1	41	18	18005	0.0402234	0.0660077	24.397	PLG
lipoprotein transport	GO:0042953	1	41	19	18005	0.0424112	0.0678579	23.113	APOB
acute inflammatory response	GO:0002526	1	41	19	18005	0.0424112	0.0678579	23.113	HPR
positive regulation of macrophage derived foam cell differentiation	GO:0010744	1	41	19	18005	0.0424112	0.0678579	23.113	APOB
vasoconstriction	GO:0042310	1	41	19	18005	0.0424112	0.0678579	23.113	CRP
cell-substrate adhesion	GO:0031589	1	41	20	18005	0.044594	0.0696102	21.9573	VWF
labyrinthine layer blood vessel development	GO:0060716	1	41	20	18005	0.044594	0.0696102	21.9573	PLG
positive regulation of superoxide anion generation	GO:0032930	1	41	20	18005	0.044594	0.0696102	21.9573	CRP
triglyceride catabolic process	GO:0019433	1	41	20	18005	0.044594	0.0696102	21.9573	APOB
muscle cell cellular homeostasis	GO:0046716	1	41	21	18005	0.0467721	0.0725676	20.9117	PLG
negative regulation of viral entry into host cell	GO:0046597	1	41	22	18005	0.0489452	0.0754818	19.9612	FCN3
tissue regeneration	GO:0042246	1	41	23	18005	0.0511136	0.0783537	19.0933	PLG
cholesterol transport	GO:0030301	1	41	24	18005	0.0532771	0.0811841	18.2978	APOB
artery morphogenesis	GO:0048844	1	41	26	18005	0.0575897	0.0857149	16.8902	APOB
positive regulation of collagen biosynthetic process	GO:0032967	1	41	26	18005	0.0575897	0.0857149	16.8902	SERPINF2
positive regulation of immunoglobulin production	GO:0002639	1	41	26	18005	0.0575897	0.0857149	16.8902	HPX
response to fatty acid	GO:0070542	1	41	26	18005	0.0575897	0.0857149	16.8902	MBP
receptor clustering	GO:0043113	1	41	27	18005	0.0597388	0.0883996	16.2647	PIGR
blood vessel morphogenesis	GO:0048514	1	41	28	18005	0.0618831	0.0910464	15.6838	SERPINF2
liver regeneration	GO:0097421	1	41	29	18005	0.0640227	0.0931239	15.143	CPB2
endodermal cell differentiation	GO:0035987	1	41	29	18005	0.0640227	0.0931239	15.143	FN1
regulation of ERK1 and ERK2 cascade	GO:0070372	1	41	30	18005	0.0661575	0.0956854	14.6382	FN1
brown fat cell differentiation	GO:0050873	1	41	31	18005	0.0682875	0.0976626	14.166	LRG1
maintenance of blood-brain barrier	GO:0035633	1	41	31	18005	0.0682875	0.0976626	14.166	MBP
positive regulation of axon extension	GO:0045773	1	41	32	18005	0.0704128	0.0990422	13.7233	FN1
response to tumor necrosis factor	GO:0034612	1	41	32	18005	0.0704128	0.0990422	13.7233	MBP
membrane organization	GO:0061024	1	41	32	18005	0.0704128	0.0990422	13.7233	MBP
response to progesterone	GO:0032570	1	41	33	18005	0.0725334	0.100916	13.3075	MBP
positive regulation of transforming growth factor beta receptor signaling pathway	GO:0030511	1	41	33	18005	0.0725334	0.100916	13.3075	LRG1
blood circulation	GO:0008015	1	41	35	18005	0.0767604	0.10622	12.547	LPA
triglyceride homeostasis	GO:0070328	1	41	36	18005	0.0788668	0.108548	12.1985	APOC2
detection of chemical stimulus involved in sensory perception of bitter taste	GO:0001580	1	41	41	18005	0.0893289	0.121639	10.7109	PIGR
retina homeostasis	GO:0001895	1	41	41	18005	0.0893289	0.121639	10.7109	PIGR
in utero embryonic development	GO:0001701	2	41	227	18005	0.0942461	0.127656	3.86913	C6, APOB
negative regulation of interferon-gamma production	GO:0032689	1	41	44	18005	0.0955504	0.128742	9.9806	PGLYRP2
positive regulation of cell differentiation	GO:0045597	1	41	45	18005	0.0976151	0.130835	9.75881	SERPINF2
response to heat	GO:0009408	1	41	46	18005	0.0996751	0.132211	9.54666	CPB2
substantia nigra development	GO:0021762	1	41	46	18005	0.0996751	0.132211	9.54666	MBP
positive regulation of cell death	GO:0010942	1	41	47	18005	0.10173	0.134242	9.34354	HPR
epidermal growth factor receptor signaling pathway	GO:0007173	1	41	48	18005	0.103781	0.135551	9.14888	PIGR
extracellular matrix disassembly	GO:0022617	1	41	48	18005	0.103781	0.135551	9.14888	PLG
positive regulation of fibroblast proliferation	GO:0048146	1	41	49	18005	0.105828	0.137522	8.96217	FN1
intermembrane lipid transfer	GO:0120009	1	41	50	18005	0.107869	0.138073	8.78293	APOB
fertilization	GO:0009566	1	41	50	18005	0.107869	0.138073	8.78293	APOB
positive regulation of blood vessel endothelial cell migration	GO:0043536	1	41	50	18005	0.107869	0.138073	8.78293	PLG
lipid metabolic process	GO:0006629	4	41	809	18005	0.110895	0.141239	2.1713	LPA, APOL1, APOC2, APOB
positive regulation of gene expression	GO:0010628	3	41	516	18005	0.112337	0.141667	2.55318	FN1, CRP, APOB
positive regulation of stress fiber assembly	GO:0051496	1	41	52	18005	0.111939	0.141667	8.44512	SERPINF2
retinol metabolic process	GO:0042572	1	41	53	18005	0.113967	0.143018	8.28578	TTR
myelination	GO:0042552	1	41	55	18005	0.11801	0.147368	7.98448	MBP
positive regulation of smooth muscle cell proliferation	GO:0048661	1	41	56	18005	0.120024	0.147722	7.8419	SERPINF2
substrate adhesion-dependent cell spreading	GO:0034446	1	41	56	18005	0.120024	0.147722	7.8419	FN1
cellular iron ion homeostasis	GO:0006879	1	41	56	18005	0.120024	0.147722	7.8419	HPX
protein secretion	GO:0009306	1	41	59	18005	0.126041	0.154385	7.44316	FGG
collagen fibril organization	GO:0030199	1	41	64	18005	0.13598	0.165766	6.86166	SERPINF2
chloride transmembrane transport	GO:1902476	1	41	67	18005	0.141891	0.17134	6.55442	APOL1
regulation of protein phosphorylation	GO:0001932	1	41	67	18005	0.141891	0.17134	6.55442	FN1
positive regulation of tyrosine phosphorylation of STAT protein	GO:0042531	1	41	68	18005	0.143852	0.172892	6.45803	HPX
cellular response to glucose stimulus	GO:0071333	1	41	69	18005	0.145809	0.174426	6.36444	CPB2
post-embryonic development	GO:0009791	1	41	70	18005	0.147761	0.175939	6.27352	APOB
positive regulation of endothelial cell proliferation	GO:0001938	1	41	73	18005	0.153593	0.182036	6.0157	LRG1
response to organic substance	GO:0010033	1	41	75	18005	0.157459	0.185759	5.85528	APOB
positive regulation of protein catabolic process	GO:0045732	1	41	77	18005	0.161308	0.189426	5.7032	C4BPA
cellular oxidant detoxification	GO:0098869	1	41	78	18005	0.163226	0.190803	5.63008	APOM
positive regulation of phosphatidylinositol 3-kinase signaling	GO:0014068	1	41	81	18005	0.168955	0.195712	5.42156	FN1
response to toxic substance	GO:0009636	1	41	81	18005	0.168955	0.195712	5.42156	MBP
flagellated sperm motility	GO:0030317	1	41	85	18005	0.176533	0.20357	5.16643	APOB
female pregnancy	GO:0007565	1	41	87	18005	0.180297	0.206978	5.04766	PZP
response to estradiol	GO:0032355	1	41	93	18005	0.191488	0.218844	4.722	APOB
regulation of inflammatory response	GO:0050727	1	41	94	18005	0.193339	0.219977	4.67177	PGLYRP2
positive regulation of JNK cascade	GO:0046330	1	41	95	18005	0.195185	0.221095	4.62259	SERPINF2
wound healing	GO:0042060	1	41	99	18005	0.20253	0.227403	4.43582	FN1
positive regulation of interleukin-6 production	GO:0032755	1	41	99	18005	0.20253	0.227403	4.43582	MBP
integrin-mediated signaling pathway	GO:0007229	1	41	106	18005	0.215227	0.240603	4.14289	FN1
response to virus	GO:0009615	1	41	118	18005	0.236535	0.263274	3.72158	APOB
protein homooligomerization	GO:0051260	1	41	122	18005	0.243512	0.269866	3.59956	C9
response to bacterium	GO:0009617	1	41	123	18005	0.245246	0.270617	3.5703	LRG1
negative regulation of catalytic activity	GO:0043086	1	41	128	18005	0.25386	0.278919	3.43083	APOC2
cellular response to tumor necrosis factor	GO:0071356	1	41	132	18005	0.260682	0.285191	3.32687	APOB
aging	GO:0007568	1	41	145	18005	0.282436	0.307675	3.0286	MBP
regulation of cell shape	GO:0008360	1	41	147	18005	0.285727	0.309941	2.98739	FN1
MAPK cascade	GO:0000165	1	41	149	18005	0.289003	0.312172	2.94729	MBP
sensory perception of sound	GO:0007605	1	41	151	18005	0.292264	0.313053	2.90825	MBP
central nervous system development	GO:0007417	1	41	151	18005	0.292264	0.313053	2.90825	MBP
response to lipopolysaccharide	GO:0032496	1	41	161	18005	0.308354	0.328911	2.72762	APOB
positive regulation of angiogenesis	GO:0045766	1	41	162	18005	0.309943	0.329234	2.71078	LRG1
nervous system development	GO:0007399	2	41	552	18005	0.359375	0.380166	1.59111	FN1, APOB
defense response to virus	GO:0051607	1	41	217	18005	0.392072	0.413047	2.02372	FCN3
endocytosis	GO:0006897	1	41	246	18005	0.431453	0.452672	1.78515	CFI
heart development	GO:0007507	1	41	251	18005	0.437987	0.457651	1.74959	FN1
response to xenobiotic stimulus	GO:0009410	1	41	253	18005	0.440579	0.458489	1.73576	CPB2
chemical synaptic transmission	GO:0007268	1	41	258	18005	0.447011	0.463298	1.70212	MBP
angiogenesis	GO:0001525	1	41	261	18005	0.450835	0.465378	1.68255	FN1
inflammatory response	GO:0006954	1	41	413	18005	0.614219	0.631486	1.06331	CRP
negative regulation of cell population proliferation	GO:0008285	1	41	463	18005	0.656756	0.672519	0.94848	PLG
spermatogenesis	GO:0007283	1	41	475	18005	0.666264	0.679536	0.924519	APOB
regulation of catalytic activity	GO:0050790	1	41	487	18005	0.675514	0.686236	0.901738	APOC2
positive regulation of cell population proliferation	GO:0008284	1	41	548	18005	0.718801	0.727324	0.801362	FN1
biological_process	GO:0008150	1	41	576	18005	0.736732	0.742533	0.762407	LRG1
positive regulation of transcription by RNA polymerase II	GO:0045944	1	41	1172	18005	0.936886	0.94056	0.374698	SERPINF2
signal transduction	GO:0007165	2	41	1987	18005	0.949812	0.949812	0.442019	IGFALS, TTR
Comparison group HCC vs LC
description	annotation_id	genes_found	input_size	term_genes	universe	pval	pval_adj	relative_enrichment	genes
immune response	GO:0006955	8	19	478	18005	1.36e-08	1.7e-06	15.8599	MBP, IGLV5-45, IGKV4-1, HP, IGLV3-21, C7, IGLV1-47, IGLL1
complement activation, classical pathway	GO:0006958	5	19	95	18005	4.03e-08	2.52e-06	49.8753	C1S, IGHV3-15, IGHV1-3, C7, IGLL1
immunoglobulin production	GO:0002377	4	19	73	18005	9.2e-07	3.83e-05	51.925	IGLV5-45, IGKV4-1, IGLV3-21, IGLV1-47
zymogen activation	GO:0031638	3	19	25	18005	2.26e-06	7.06e-05	113.716	HP, HPR, CD5L
blood coagulation, fibrin clot formation	GO:0072378	2	19	7	18005	2.21e-05	0.000501662	270.752	F13B, FGA
innate immune response	GO:0045087	6	19	596	18005	2.41e-05	0.000501662	9.53992	FGA, C1S, IGHV3-15, IGHV1-3, C7, IGLL1
adaptive immune response	GO:0002250	5	19	378	18005	3.62e-05	0.000647032	12.5348	FGA, IGLV5-45, IGKV4-1, IGLV3-21, IGLV1-47
phagocytosis, recognition	GO:0006910	3	19	70	18005	5.22e-05	0.000721233	40.6128	IGHV3-15, IGHV1-3, IGLL1
positive regulation of B cell activation	GO:0050871	3	19	71	18005	5.44e-05	0.000721233	40.0408	IGHV3-15, IGHV1-3, IGLL1
regulation of complement activation	GO:0030449	2	19	11	18005	5.77e-05	0.000721233	172.297	C7, CD5L
defense response to bacterium	GO:0042742	4	19	245	18005	0.000110405	0.00115005	15.4715	IGHV3-15, HP, IGHV1-3, IGLL1
phagocytosis, engulfment	GO:0006911	3	19	88	18005	0.0001033	0.00115005	32.3056	IGHV3-15, IGHV1-3, IGLL1
high-density lipoprotein particle remodeling	GO:0034375	2	19	16	18005	0.000125492	0.00120666	118.454	LCAT, APOC3
reverse cholesterol transport	GO:0043691	2	19	17	18005	0.000142135	0.00122143	111.486	LCAT, APOC3
B cell receptor signaling pathway	GO:0050853	3	19	99	18005	0.000146571	0.00122143	28.7161	IGHV3-15, IGHV1-3, IGLL1
acute inflammatory response	GO:0002526	2	19	19	18005	0.000178489	0.00139445	99.7507	HP, HPR
immune system process	GO:0002376	5	19	570	18005	0.00025127	0.00174493	8.31256	FGA, C1S, HP, C7, CD5L
complement activation	GO:0006956	2	19	22	18005	0.000240662	0.00174493	86.1483	C1S, C7
lipoprotein metabolic process	GO:0042157	2	19	26	18005	0.000337743	0.00222199	72.8947	LCAT, APOC3
acute-phase response	GO:0006953	2	19	39	18005	0.000763783	0.00477364	48.5965	HP, A2M
positive regulation of complement-dependent cytotoxicity	GO:1903661	1	19	1	18005	0.00105526	0.00573512	947.632	CD5L
negative regulation of high-density lipoprotein particle clearance	GO:0010987	1	19	1	18005	0.00105526	0.00573512	947.632	APOC3
negative regulation of blood coagulation, common pathway	GO:2000261	1	19	1	18005	0.00105526	0.00573512	947.632	FGA
positive regulation of cell death	GO:0010942	2	19	47	18005	0.00110865	0.0057742	40.3247	HP, HPR
hemostasis	GO:0007599	2	19	55	18005	0.00151534	0.0075767	34.4593	F13B, FGA
response to glucocorticoid	GO:0051384	2	19	64	18005	0.00204559	0.00824012	29.6135	LCAT, A2M
negative regulation of hydrogen peroxide catabolic process	GO:2000296	1	19	2	18005	0.00210947	0.00824012	473.816	HP
immune effector process	GO:0002252	1	19	2	18005	0.00210947	0.00824012	473.816	HP
blood coagulation, common pathway	GO:0072377	1	19	2	18005	0.00210947	0.00824012	473.816	FGA
negative regulation of cholesterol import	GO:0060621	1	19	2	18005	0.00210947	0.00824012	473.816	APOC3
response to carbon dioxide	GO:0010037	1	19	2	18005	0.00210947	0.00824012	473.816	A2M
negative regulation of complement activation, lectin pathway	GO:0001869	1	19	2	18005	0.00210947	0.00824012	473.816	A2M
embryonic liver development	GO:1990402	1	19	3	18005	0.00316262	0.0116273	315.877	A2M
regulation of high-density lipoprotein particle assembly	GO:0090107	1	19	3	18005	0.00316262	0.0116273	315.877	LCAT
cholesterol esterification	GO:0034435	1	19	4	18005	0.00421472	0.0142389	236.908	LCAT
negative regulation of very-low-density lipoprotein particle clearance	GO:0010916	1	19	4	18005	0.00421472	0.0142389	236.908	APOC3
negative regulation of very-low-density lipoprotein particle remodeling	GO:0010903	1	19	4	18005	0.00421472	0.0142389	236.908	APOC3
blood coagulation	GO:0007596	2	19	95	18005	0.0044432	0.0146158	19.9501	F13B, FGA
cholesterol homeostasis	GO:0042632	2	19	100	18005	0.0049104	0.0156719	18.9526	LCAT, APOC3
negative regulation of triglyceride catabolic process	GO:0010897	1	19	5	18005	0.00526577	0.0156719	189.526	APOC3
chylomicron remnant clearance	GO:0034382	1	19	5	18005	0.00526577	0.0156719	189.526	APOC3
negative regulation of lipid metabolic process	GO:0045833	1	19	5	18005	0.00526577	0.0156719	189.526	APOC3
lipoprotein biosynthetic process	GO:0042158	1	19	6	18005	0.00631577	0.0179425	157.939	LCAT
acute inflammatory response to antigenic stimulus	GO:0002438	1	19	6	18005	0.00631577	0.0179425	157.939	A2M
positive regulation of metalloendopeptidase activity	GO:1904685	1	19	7	18005	0.00736472	0.0187875	135.376	MBP
axon ensheathment	GO:0008366	1	19	7	18005	0.00736472	0.0187875	135.376	MBP
induction of bacterial agglutination	GO:0043152	1	19	7	18005	0.00736472	0.0187875	135.376	FGA
negative regulation of lipoprotein lipase activity	GO:0051005	1	19	7	18005	0.00736472	0.0187875	135.376	APOC3
response to mercury ion	GO:0046689	1	19	7	18005	0.00736472	0.0187875	135.376	MBP
response to prostaglandin E	GO:0034695	1	19	8	18005	0.00841261	0.0198411	118.454	A2M
negative regulation of oxidoreductase activity	GO:0051354	1	19	8	18005	0.00841261	0.0198411	118.454	HP
negative regulation of receptor-mediated endocytosis	GO:0048261	1	19	8	18005	0.00841261	0.0198411	118.454	APOC3
regulation of Cdc42 protein signal transduction	GO:0032489	1	19	8	18005	0.00841261	0.0198411	118.454	APOC3
luteinization	GO:0001553	1	19	9	18005	0.00945946	0.0214988	105.292	A2M
very-low-density lipoprotein particle remodeling	GO:0034372	1	19	9	18005	0.00945946	0.0214988	105.292	LCAT
positive regulation of chemokine (C-X-C motif) ligand 2 production	GO:2000343	1	19	10	18005	0.0105053	0.0222569	94.7632	MBP
very-low-density lipoprotein particle assembly	GO:0034379	1	19	10	18005	0.0105053	0.0222569	94.7632	APOC3
plasminogen activation	GO:0031639	1	19	10	18005	0.0105053	0.0222569	94.7632	FGA
positive regulation of peptide hormone secretion	GO:0090277	1	19	10	18005	0.0105053	0.0222569	94.7632	FGA
negative regulation of endopeptidase activity	GO:0010951	2	19	154	18005	0.0112979	0.0235372	12.3069	LPA, A2M
negative regulation of heterotypic cell-cell adhesion	GO:0034115	1	19	11	18005	0.01155	0.0236681	86.1483	MBP
lipid transport	GO:0006869	2	19	160	18005	0.0121526	0.0245013	11.8454	LPA, APOC3
phospholipid efflux	GO:0033700	1	19	12	18005	0.0125937	0.0245971	78.9693	APOC3
negative regulation of axonogenesis	GO:0050771	1	19	12	18005	0.0125937	0.0245971	78.9693	MBP
response to copper ion	GO:0046688	1	19	14	18005	0.014678	0.028227	67.688	LCAT
protein polymerization	GO:0051258	1	19	15	18005	0.0157186	0.0284757	63.1754	FGA
positive regulation of heterotypic cell-cell adhesion	GO:0034116	1	19	15	18005	0.0157186	0.0284757	63.1754	FGA
negative regulation of low-density lipoprotein particle clearance	GO:0010989	1	19	15	18005	0.0157186	0.0284757	63.1754	APOC3
complement activation, alternative pathway	GO:0006957	1	19	15	18005	0.0157186	0.0284757	63.1754	C7
negative regulation of fatty acid biosynthetic process	GO:0045717	1	19	16	18005	0.0167582	0.0299253	59.227	APOC3
fibrinolysis	GO:0042730	1	19	18	18005	0.0188341	0.0331587	52.6462	FGA
phosphatidylcholine metabolic process	GO:0046470	1	19	19	18005	0.0198705	0.0344975	49.8753	LCAT
negative regulation of lipid catabolic process	GO:0050995	1	19	20	18005	0.0209059	0.0348432	47.3816	APOC3
cytolysis	GO:0019835	1	19	20	18005	0.0209059	0.0348432	47.3816	C7
triglyceride catabolic process	GO:0019433	1	19	20	18005	0.0209059	0.0348432	47.3816	APOC3
positive regulation of exocytosis	GO:0045921	1	19	23	18005	0.0240059	0.0389706	41.2014	FGA
phosphatidylcholine biosynthetic process	GO:0006656	1	19	23	18005	0.0240059	0.0389706	41.2014	LCAT
cholesterol transport	GO:0030301	1	19	24	18005	0.0250371	0.0401236	39.4846	LCAT
proteolysis	GO:0006508	3	19	617	18005	0.0257806	0.0407302	4.60761	LPA, C1S, HP
cholesterol efflux	GO:0033344	1	19	25	18005	0.0260673	0.0407302	37.9053	APOC3
response to fatty acid	GO:0070542	1	19	26	18005	0.0270965	0.0418156	36.4474	MBP
negative regulation of extrinsic apoptotic signaling pathway via death domain receptors	GO:1902042	1	19	28	18005	0.0291518	0.0444387	33.844	FGA
peptide cross-linking	GO:0018149	1	19	29	18005	0.0301779	0.0454486	32.677	F13B
positive regulation of vasoconstriction	GO:0045907	1	19	32	18005	0.03325	0.047773	29.6135	FGA
membrane organization	GO:0061024	1	19	32	18005	0.03325	0.047773	29.6135	MBP
maintenance of blood-brain barrier	GO:0035633	1	19	31	18005	0.032227	0.047773	30.5688	MBP
response to tumor necrosis factor	GO:0034612	1	19	32	18005	0.03325	0.047773	29.6135	MBP
response to progesterone	GO:0032570	1	19	33	18005	0.034272	0.0486818	28.7161	MBP
negative regulation of endothelial cell apoptotic process	GO:2000352	1	19	36	18005	0.0373318	0.0501772	26.3231	FGA
triglyceride homeostasis	GO:0070328	1	19	36	18005	0.0373318	0.0501772	26.3231	APOC3
stem cell differentiation	GO:0048863	1	19	35	18005	0.0363129	0.0501772	27.0752	A2M
blood circulation	GO:0008015	1	19	35	18005	0.0363129	0.0501772	27.0752	LPA
triglyceride metabolic process	GO:0006641	1	19	36	18005	0.0373318	0.0501772	26.3231	APOC3
positive regulation of substrate adhesion-dependent cell spreading	GO:1900026	1	19	43	18005	0.0444358	0.0590901	22.0379	FGA
platelet aggregation	GO:0070527	1	19	44	18005	0.0454466	0.0597981	21.5371	FGA
response to hydrogen peroxide	GO:0042542	1	19	46	18005	0.0474651	0.0611664	20.6007	HP
substantia nigra development	GO:0021762	1	19	46	18005	0.0474651	0.0611664	20.6007	MBP
lipid metabolic process	GO:0006629	3	19	809	18005	0.0512122	0.0650127	3.51408	LPA, LCAT, APOC3
positive regulation of protein secretion	GO:0050714	1	19	50	18005	0.05149	0.0650127	18.9526	FGA
cellular defense response	GO:0006968	1	19	53	18005	0.0544982	0.0681227	17.8798	CD5L
myelination	GO:0042552	1	19	55	18005	0.0564986	0.069924	17.2297	MBP
response to calcium ion	GO:0051592	1	19	56	18005	0.0574972	0.0704623	16.922	FGA
response to nutrient	GO:0007584	1	19	62	18005	0.0634684	0.0762841	15.2844	A2M
phospholipid metabolic process	GO:0006644	1	19	62	18005	0.0634684	0.0762841	15.2844	LCAT
platelet activation	GO:0030168	1	19	69	18005	0.0703895	0.083797	13.7338	FGA
cellular oxidant detoxification	GO:0098869	1	19	78	18005	0.0792168	0.093416	12.1491	HP
response to toxic substance	GO:0009636	1	19	81	18005	0.0821415	0.0959597	11.6992	MBP
positive regulation of interleukin-6 production	GO:0032755	1	19	99	18005	0.099506	0.115169	9.57204	MBP
cell-matrix adhesion	GO:0007160	1	19	103	18005	0.103322	0.118489	9.20031	FGA
cholesterol metabolic process	GO:0008203	1	19	105	18005	0.105225	0.119574	9.02506	LCAT
lipid catabolic process	GO:0016042	1	19	115	18005	0.114679	0.129144	8.24027	APOC3
negative regulation of peptidase activity	GO:0010466	1	19	119	18005	0.118435	0.132182	7.96329	A2M
steroid metabolic process	GO:0008202	1	19	128	18005	0.126829	0.140298	7.40337	LCAT
protein-containing complex assembly	GO:0065003	1	19	143	18005	0.140652	0.154223	6.62679	FGA
aging	GO:0007568	1	19	145	18005	0.142479	0.154869	6.53539	MBP
central nervous system development	GO:0007417	1	19	151	18005	0.147939	0.156715	6.27571	MBP
MAPK cascade	GO:0000165	1	19	149	18005	0.146123	0.156715	6.35994	MBP
sensory perception of sound	GO:0007605	1	19	151	18005	0.147939	0.156715	6.27571	MBP
defense response	GO:0006952	1	19	157	18005	0.153366	0.161098	6.03587	HP
positive regulation of ERK1 and ERK2 cascade	GO:0070374	1	19	226	18005	0.213466	0.222361	4.19306	FGA
endocytosis	GO:0006897	1	19	246	18005	0.230116	0.237724	3.85216	CD5L
chemical synaptic transmission	GO:0007268	1	19	258	18005	0.239946	0.245846	3.67299	MBP
inflammatory response	GO:0006954	1	19	413	18005	0.356686	0.362486	2.29451	CD5L
apoptotic process	GO:0006915	1	19	688	18005	0.523188	0.527407	1.37737	CD5L
G protein-coupled receptor signaling pathway	GO:0007186	1	19	944	18005	0.640758	0.640758	1.00385	APOC3

## Sheet: Table S10
Table S10: GO enrichment (cellular component) for DEPs in the pairwise comparison by using Genecodis
Comparison group LC vs HP
description	annotation_id	genes_found	input_size	term_genes	universe	pval	pval_adj	relative_enrichment	genes
extracellular region	GO:0005576	31	35	2423	18886	5.93e-24	3.2e-22	6.90367	F12, C4B, SERPIND1, PZP, LPA, IGLV1-40, LGALS3BP, PIGR, IGKV1D-39, CPB2, IGFALS, IGKV3-20, CRP, IGKV3D-11, HP, SERPINF2, EFEMP1, HPR, APOC3, IGKV3-15, C7, IGLV3-19, IGLV1-47, IGLL1, APOL1, VWF, ITIH1, APOC2, TGFBI, APOC1, C8A
extracellular space	GO:0005615	26	35	1804	18886	7.73e-20	2.09e-18	7.77694	F12, C4B, SERPIND1, LPA, IGLV1-40, LGALS3BP, PIGR, IGKV1D-39, CPB2, IGFALS, IGKV3-20, CRP, IGKV3D-11, HP, SERPINF2, EFEMP1, HPR, APOC3, IGKV3-15, IGLV3-19, IGLV1-47, APOL1, VWF, APOC2, TGFBI, C8A
blood microparticle	GO:0072562	13	35	144	18886	2.17e-19	3.9e-18	48.7139	C4B, PZP, LGALS3BP, IGKV3-20, IGKV3D-11, HP, SERPINF2, HPR, IGKV3-15, IGLV1-47, APOL1, ITIH1, C8A
extracellular exosome	GO:0070062	21	35	2208	18886	1.1e-11	1.49e-10	5.13207	F12, C4B, SERPIND1, PZP, LGALS3BP, PIGR, CPB2, IGFALS, IGKV3-20, IGKV3D-11, HP, SERPINF2, EFEMP1, HPR, APOC3, C7, IGLV3-19, VWF, ITIH1, TGFBI, C8A
immunoglobulin complex	GO:0019814	6	35	76	18886	5.14e-09	5.55e-08	42.6	IGLV1-40, IGKV1D-39, IGKV3D-11, IGKV3-15, IGLV3-19, IGLV1-47
collagen-containing extracellular matrix	GO:0062023	9	35	379	18886	2.14e-08	1.92e-07	12.8137	F12, PZP, LGALS3BP, SERPINF2, EFEMP1, APOC3, VWF, ITIH1, TGFBI
very-low-density lipoprotein particle	GO:0034361	4	35	21	18886	5.78e-08	4.46e-07	102.781	APOC3, APOL1, APOC2, APOC1
immunoglobulin complex, circulating	GO:0042571	5	35	64	18886	1.14e-07	7.72e-07	42.1562	IGHV4-61, IGHV6-1, IGHV3-74, IGHV4-4, IGLL1
spherical high-density lipoprotein particle	GO:0034366	3	35	8	18886	3.24e-07	1.95e-06	202.35	HPR, APOC3, APOC2
chylomicron	GO:0042627	3	35	13	18886	1.65e-06	8.89e-06	124.523	APOC3, APOC2, APOC1
high-density lipoprotein particle	GO:0034364	3	35	26	18886	1.47e-05	7.23e-05	62.2615	APOL1, APOC2, APOC1
secretory IgA immunoglobulin complex	GO:0071751	2	35	5	18886	3.32e-05	0.000138109	215.84	PIGR, IGKV3-20
intermediate-density lipoprotein particle	GO:0034363	2	35	5	18886	3.32e-05	0.000138109	215.84	APOC3, APOC2
membrane attack complex	GO:0005579	2	35	7	18886	6.97e-05	0.000268686	154.171	C7, C8A
external side of plasma membrane	GO:0009897	5	35	413	18886	0.000922758	0.00332193	6.53269	IGHV4-61, IGHV6-1, IGHV3-74, IGHV4-4, IGLL1
plasma lipoprotein particle	GO:0034358	1	35	1	18886	0.00185323	0.00588671	539.6	LPA
extracellular matrix	GO:0031012	4	35	284	18886	0.00181596	0.00588671	7.6	IGFALS, EFEMP1, VWF, TGFBI
symbiont cell surface	GO:0106139	1	35	2	18886	0.00370311	0.0111093	269.8	C4B
pentameric IgM immunoglobulin complex	GO:0071756	1	35	3	18886	0.00554967	0.0157727	179.867	IGKV3-20
classical-complement-pathway C3/C5 convertase complex	GO:0005601	1	35	4	18886	0.0073929	0.0173573	134.9	C4B
platelet alpha granule lumen	GO:0031093	2	35	67	18886	0.00684046	0.0173573	16.1075	SERPINF2, VWF
monomeric IgA immunoglobulin complex	GO:0071748	1	35	4	18886	0.0073929	0.0173573	134.9	IGKV3-20
insulin-like growth factor ternary complex	GO:0042567	1	35	4	18886	0.0073929	0.0173573	134.9	IGFALS
Weibel-Palade body	GO:0033093	1	35	6	18886	0.0110694	0.0249062	89.9333	VWF
fibrinogen complex	GO:0005577	1	35	8	18886	0.0147327	0.0318226	67.45	SERPINF2
endoplasmic reticulum lumen	GO:0005788	3	35	304	18886	0.0184836	0.0383891	5.325	C4B, SERPIND1, APOL1
haptoglobin-hemoglobin complex	GO:0031838	1	35	11	18886	0.0202029	0.0404058	49.0545	HP
platelet dense granule lumen	GO:0031089	1	35	14	18886	0.0256436	0.0477502	38.5429	LGALS3BP
low-density lipoprotein particle	GO:0034362	1	35	14	18886	0.0256436	0.0477502	38.5429	APOC2
intrinsic component of membrane	GO:0031224	1	35	15	18886	0.0274507	0.0494112	35.9733	APOL1
platelet alpha granule	GO:0031091	1	35	17	18886	0.031055	0.0540958	31.7412	VWF
endocytic vesicle lumen	GO:0071682	1	35	18	18886	0.0328523	0.0554382	29.9778	HP
extrinsic component of plasma membrane	GO:0019897	1	35	25	18886	0.045343	0.0741976	21.584	LPA
early endosome	GO:0005769	2	35	288	18886	0.0993232	0.153241	3.74722	APOC3, APOC2
tertiary granule lumen	GO:1904724	1	35	55	18886	0.0971223	0.153241	9.81091	HP
azurophil granule membrane	GO:0035577	1	35	59	18886	0.103817	0.155725	9.14576	PIGR
rough endoplasmic reticulum	GO:0005791	1	35	63	18886	0.110463	0.156973	8.56508	F12
specific granule lumen	GO:0035580	1	35	62	18886	0.108806	0.156973	8.70323	HP
basement membrane	GO:0005604	1	35	94	18886	0.160372	0.222053	5.74043	TGFBI
plasma membrane	GO:0005886	12	35	5099	18886	0.213997	0.288897	1.2699	F12, C4B, IGLV1-40, PIGR, IGKV1D-39, IGKV3-20, IGKV3D-11, IGKV3-15, IGLV3-19, IGLV1-47, TGFBI, C8A
trans-Golgi network	GO:0005802	1	35	189	18886	0.296961	0.381807	2.85503	TGFBI
cellular anatomical entity	GO:0110165	1	35	185	18886	0.291673	0.381807	2.91676	F12
receptor complex	GO:0043235	1	35	219	18886	0.335418	0.421223	2.46393	PIGR
neuronal cell body	GO:0043025	1	35	376	18886	0.505636	0.620553	1.43511	C4B
axon	GO:0030424	1	35	405	18886	0.532058	0.63847	1.33235	C4B
endoplasmic reticulum	GO:0005783	3	35	1580	18886	0.570018	0.669152	1.02456	IGLL1, VWF, APOC1
dendrite	GO:0030425	1	35	473	18886	0.588748	0.676434	1.1408	C4B
cell surface	GO:0009986	1	35	633	18886	0.697083	0.784218	0.852449	SERPINF2
synapse	GO:0045202	1	35	815	18886	0.786765	0.867047	0.662086	C4B
cell junction	GO:0030054	1	35	938	18886	0.83214	0.898711	0.575267	C4B
cell projection	GO:0042995	1	35	1166	18886	0.892742	0.945256	0.462779	C4B
integral component of plasma membrane	GO:0005887	1	35	1440	18886	0.937867	0.973938	0.374722	PIGR
membrane	GO:0016020	4	35	7824	18886	0.999981	0.999981	0.275869	LGALS3BP, PIGR, IGLL1, C8A
integral component of membrane	GO:0016021	2	35	5173	18886	0.999808	0.999981	0.208622	PIGR, C8A
Comparison group HCC vs HP
description	annotation_id	genes_found	input_size	term_genes	universe	pval	pval_adj	relative_enrichment	genes
blood microparticle	GO:0072562	20	41	144	18884	2.64e-32	2.01e-30	63.9702	FGA, FN1, PZP, FGB, C1R, ITIH2, C1S, IGKV4-1, C4BPA, IGKV3D-11, IGLV3-21, SERPINF2, FCN3, HPR, FGG, APOL1, C9, PLG, CFH, HPX
extracellular region	GO:0005576	37	41	2422	18884	4.69e-29	1.78e-27	7.03619	LRG1, F13B, FGA, FN1, PZP, LPA, APOM, FGB, CFI, PIGR, C1R, CPB2, PGLYRP2, IGFALS, HABP2, C6, ITIH2, C1S, IGKV4-1, C4BPA, CRP, IGKV3D-11, IGLV3-21, SERPINF2, FCN3, HPR, FGG, APOL1, C9, VWF, PLG, IGKV1-16, CFH, TTR, APOC2, HPX, APOB
extracellular space	GO:0005615	31	41	1803	18884	8.13e-24	2.06e-22	7.91911	LRG1, FGA, FN1, LPA, FGB, CFI, PIGR, C1R, CPB2, IGFALS, HABP2, C1S, IGKV4-1, C4BPA, CRP, IGKV3D-11, IGLV3-21, SERPINF2, FCN3, HPR, FGG, APOL1, C9, VWF, PLG, IGKV1-16, CFH, TTR, APOC2, HPX, APOB
extracellular exosome	GO:0070062	25	41	2208	18884	6.91e-14	1.31e-12	5.21496	LRG1, FGA, FN1, PZP, FGB, CFI, PIGR, C1R, CPB2, PGLYRP2, IGFALS, C6, ITIH2, IGKV3D-11, IGLV3-21, SERPINF2, HPR, FGG, C9, VWF, PLG, CFH, TTR, HPX, APOB
fibrinogen complex	GO:0005577	5	41	8	18884	2.09e-12	3.17e-11	287.866	FGA, FN1, FGB, SERPINF2, FGG
platelet alpha granule lumen	GO:0031093	7	41	67	18884	1.05e-10	1.33e-09	48.1209	FGA, FN1, FGB, SERPINF2, FGG, VWF, PLG
collagen-containing extracellular matrix	GO:0062023	11	41	379	18884	3.39e-10	3.68e-09	13.3679	FGA, FN1, PZP, FGB, ITIH2, SERPINF2, FCN3, FGG, VWF, PLG, HPX
platelet alpha granule	GO:0031091	4	41	17	18884	4.46e-08	4.24e-07	108.373	FGA, FGB, FGG, VWF
very-low-density lipoprotein particle	GO:0034361	4	41	21	18884	1.11e-07	9.41e-07	87.7305	APOM, APOL1, APOC2, APOB
high-density lipoprotein particle	GO:0034364	4	41	26	18884	2.76e-07	2.1e-06	70.8593	APOM, APOL1, APOC2, APOB
spherical high-density lipoprotein particle	GO:0034366	3	41	8	18884	5.28e-07	3.65e-06	172.72	APOM, HPR, APOC2
low-density lipoprotein particle	GO:0034362	3	41	14	18884	3.4e-06	2.15e-05	98.6969	APOM, APOC2, APOB
serine-type endopeptidase complex	GO:1905370	3	41	19	18884	8.99e-06	5.25e-05	72.724	CFI, FCN3, CFH
immunoglobulin complex	GO:0019814	4	41	75	18884	2.08e-05	0.000112858	24.5646	IGKV4-1, IGKV3D-11, IGLV3-21, IGKV1-16
endoplasmic reticulum lumen	GO:0005788	6	41	304	18884	4.64e-05	0.000220206	9.0905	FGA, FN1, ITIH2, FGG, APOL1, APOB
intermediate-density lipoprotein particle	GO:0034363	2	41	5	18884	4.58e-05	0.000220206	184.234	APOC2, APOB
membrane attack complex	GO:0005579	2	41	7	18884	9.59e-05	0.000428817	131.596	C6, C9
external side of plasma membrane	GO:0009897	6	41	412	18884	0.000244951	0.00103424	6.70755	FGA, FGB, IGHV3-74, FGG, IGHV4-4, IGHV3-49
immunoglobulin complex, circulating	GO:0042571	3	41	63	18884	0.000344598	0.0013427	21.9326	IGHV3-74, IGHV4-4, IGHV3-49
chylomicron	GO:0042627	2	41	13	18884	0.000353342	0.0013427	70.8593	APOC2, APOB
endocytic vesicle lumen	GO:0071682	2	41	18	18884	0.000688343	0.00249115	51.1762	HPX, APOB
extrinsic component of plasma membrane	GO:0019897	2	41	25	18884	0.00133677	0.00461793	36.8468	LPA, PLG
vesicle lumen	GO:0031983	1	41	1	18884	0.00217115	0.00634644	460.585	APOB
plasma lipoprotein particle	GO:0034358	1	41	1	18884	0.00217115	0.00634644	460.585	LPA
mature chylomicron	GO:0034359	1	41	1	18884	0.00217115	0.00634644	460.585	APOB
chylomicron remnant	GO:0034360	1	41	1	18884	0.00217115	0.00634644	460.585	APOB
cell surface	GO:0009986	6	41	633	18884	0.00229249	0.00645294	4.36574	FGA, MBP, FGB, SERPINF2, FGG, PLG
discoidal high-density lipoprotein particle	GO:0034365	1	41	2	18884	0.0043377	0.0117738	230.293	APOM
insulin-like growth factor ternary complex	GO:0042567	1	41	4	18884	0.00865704	0.0212237	115.146	IGFALS
compact myelin	GO:0043218	1	41	4	18884	0.00865704	0.0212237	115.146	MBP
internode region of axon	GO:0033269	1	41	4	18884	0.00865704	0.0212237	115.146	MBP
secretory IgA immunoglobulin complex	GO:0071751	1	41	5	18884	0.0108099	0.0256734	92.1171	PIGR
Weibel-Palade body	GO:0033093	1	41	6	18884	0.0129581	0.0298429	76.7642	VWF
extrinsic component of external side of plasma membrane	GO:0031232	1	41	10	18884	0.0215057	0.0480715	46.0585	PLG
extracellular matrix	GO:0031012	3	41	284	18884	0.0235606	0.0511601	4.86534	FN1, IGFALS, VWF
intrinsic component of membrane	GO:0031224	1	41	15	18884	0.0320886	0.0677427	30.7057	APOL1
extracellular vesicle	GO:1903561	2	41	134	18884	0.034223	0.0702958	6.87441	FGA, FGB
endosome lumen	GO:0031904	1	41	18	18884	0.0383847	0.0767694	25.5881	APOB
smooth endoplasmic reticulum	GO:0005790	1	41	23	18884	0.0487895	0.095077	20.0255	APOB
myelin sheath	GO:0043209	1	41	30	18884	0.0631719	0.120027	15.3528	MBP
vesicle membrane	GO:0012506	1	41	31	18884	0.0652091	0.120875	14.8576	APOB
endoplasmic reticulum exit site	GO:0070971	1	41	34	18884	0.0712949	0.12901	13.5466	APOB
tertiary granule lumen	GO:1904724	1	41	55	18884	0.112826	0.199414	8.37428	LRG1
azurophil granule membrane	GO:0035577	1	41	59	18884	0.120529	0.208186	7.80653	PIGR
specific granule lumen	GO:0035580	1	41	62	18884	0.126263	0.213244	7.4288	LRG1
early endosome	GO:0005769	2	41	288	18884	0.129178	0.213424	3.19851	APOC2, APOB
clathrin-coated endocytic vesicle membrane	GO:0030669	1	41	70	18884	0.141376	0.228609	6.57979	APOB
Schaffer collateral - CA1 synapse	GO:0098685	1	41	74	18884	0.148837	0.235659	6.22413	PLG
endoplasmic reticulum-Golgi intermediate compartment	GO:0005793	1	41	81	18884	0.161741	0.250864	5.68624	FN1
cell periphery	GO:0071944	1	41	85	18884	0.169029	0.256925	5.41865	MBP
collagen trimer	GO:0005581	1	41	94	18884	0.185202	0.261776	4.89984	FCN3
plasma membrane	GO:0005886	14	41	5098	18884	0.19388	0.261776	1.26485	FGA, FN1, MBP, FGB, PIGR, IGKV4-1, C4BPA, IGKV3D-11, IGLV3-21, FGG, C9, PLG, IGKV1-16, APOB
lysosomal lumen	GO:0043202	1	41	95	18884	0.18698	0.261776	4.84827	APOB
neuronal cell body	GO:0043025	2	41	376	18884	0.196332	0.261776	2.44992	MBP, APOB
lipid droplet	GO:0005811	1	41	100	18884	0.195813	0.261776	4.60585	APOB
basement membrane	GO:0005604	1	41	94	18884	0.185202	0.261776	4.89984	FN1
azurophil granule lumen	GO:0035578	1	41	91	18884	0.179846	0.261776	5.06138	TTR
ficolin-1-rich granule lumen	GO:1904813	1	41	125	18884	0.238592	0.312638	3.68468	LRG1
cell cortex	GO:0005938	1	41	175	18884	0.317593	0.409103	2.63192	FGB
cellular anatomical entity	GO:0110165	1	41	185	18884	0.332405	0.421046	2.48965	FGG
receptor complex	GO:0043235	1	41	219	18884	0.380455	0.47401	2.10313	PIGR
endosome membrane	GO:0010008	1	41	284	18884	0.463106	0.567678	1.62178	APOB
protein-containing complex	GO:0032991	2	41	729	18884	0.473409	0.571097	1.26361	MBP, TTR
glutamatergic synapse	GO:0098978	1	41	318	18884	0.501948	0.596063	1.44838	PLG
synapse	GO:0045202	2	41	815	18884	0.533387	0.623653	1.13027	MBP, FGB
apical plasma membrane	GO:0016324	1	41	361	18884	0.547162	0.630066	1.27586	FN1
intracellular membrane-bounded organelle	GO:0043231	2	41	997	18884	0.644875	0.731499	0.923943	LRG1, APOB
endoplasmic reticulum	GO:0005783	3	41	1580	18884	0.67828	0.758078	0.874529	FGB, VWF, APOB
integral component of plasma membrane	GO:0005887	1	41	1440	18884	0.961445	1	0.319851	PIGR
cytoplasm	GO:0005737	4	41	7027	18884	0.999987	1	0.26218	FGB, FGG, TTR, APOB
membrane	GO:0016020	6	41	7824	18884	0.999952	1	0.35321	LRG1, MBP, CFI, PIGR, PGLYRP2, C9
cytosol	GO:0005829	2	41	5322	18884	0.999979	1	0.173087	MBP, APOB
nucleus	GO:0005634	1	41	6640	18884	1	1	0.0693653	MBP
cell projection	GO:0042995	1	41	1166	18884	0.926902	1	0.395013	MBP
integral component of membrane	GO:0016021	2	41	5173	18884	0.999968	1	0.178073	PIGR, C9
endoplasmic reticulum membrane	GO:0005789	1	41	1074	18884	0.909588	1	0.42885	APOB
Comparison group HCC vs LC
description	annotation_id	genes_found	input_size	term_genes	universe	pval	pval_adj	relative_enrichment	genes
blood microparticle	GO:0072562	9	19	144	18884	5.86e-15	2.4e-13	62.1184	FGA, C1S, IGKV4-1, HP, IGLV3-21, HPR, IGLV1-47, A2M, CD5L
extracellular region	GO:0005576	15	19	2422	18884	9.38e-11	1.92e-09	6.15542	F13B, FGA, LPA, C1S, IGKV4-1, HP, IGLV3-21, LCAT, HPR, APOC3, C7, IGLV1-47, IGLL1, A2M, CD5L
extracellular space	GO:0005615	13	19	1803	18884	8.23e-10	1.12e-08	7.16619	FGA, LPA, IGLV5-45, C1S, IGKV4-1, HP, IGLV3-21, LCAT, HPR, APOC3, IGLV1-47, A2M, CD5L
immunoglobulin complex	GO:0019814	4	19	75	18884	8.5e-07	8.71e-06	53.0077	IGLV5-45, IGKV4-1, IGLV3-21, IGLV1-47
spherical high-density lipoprotein particle	GO:0034366	2	19	8	18884	2.68e-05	0.000219416	248.474	HPR, APOC3
immunoglobulin complex, circulating	GO:0042571	3	19	63	18884	3.3e-05	0.000225548	47.3283	IGHV3-15, IGHV1-3, IGLL1
external side of plasma membrane	GO:0009897	4	19	412	18884	0.000667341	0.00390871	9.64946	FGA, IGHV3-15, IGHV1-3, IGLL1
extracellular exosome	GO:0070062	8	19	2208	18884	0.000791395	0.0040559	3.60107	FGA, HP, IGLV3-21, LCAT, HPR, APOC3, C7, A2M
plasma lipoprotein particle	GO:0034358	1	19	1	18884	0.00100614	0.00458354	993.895	LPA
platelet alpha granule lumen	GO:0031093	2	19	67	18884	0.00203949	0.00836189	29.6685	FGA, A2M
internode region of axon	GO:0033269	1	19	4	18884	0.00401882	0.013731	248.474	MBP
compact myelin	GO:0043218	1	19	4	18884	0.00401882	0.013731	248.474	MBP
intermediate-density lipoprotein particle	GO:0034363	1	19	5	18884	0.00502113	0.0158359	198.779	APOC3
collagen-containing extracellular matrix	GO:0062023	3	19	379	18884	0.00612062	0.0179247	7.86724	FGA, APOC3, A2M
membrane attack complex	GO:0005579	1	19	7	18884	0.00702289	0.0191959	141.985	C7
fibrinogen complex	GO:0005577	1	19	8	18884	0.00802234	0.0205572	124.237	FGA
haptoglobin-hemoglobin complex	GO:0031838	1	19	11	18884	0.011015	0.0265655	90.3541	HP
chylomicron	GO:0042627	1	19	13	18884	0.0130053	0.0296232	76.4534	APOC3
platelet alpha granule	GO:0031091	1	19	17	18884	0.0169746	0.0366293	58.4644	FGA
endocytic vesicle lumen	GO:0071682	1	19	18	18884	0.0179645	0.0368273	55.2164	HP
very-low-density lipoprotein particle	GO:0034361	1	19	21	18884	0.0209287	0.0408609	47.3283	APOC3
high-density lipoprotein particle	GO:0034364	1	19	26	18884	0.0258502	0.0441608	38.2267	LCAT
extrinsic component of plasma membrane	GO:0019897	1	19	25	18884	0.0248678	0.0441608	39.7558	LPA
cell surface	GO:0009986	3	19	633	18884	0.0243473	0.0441608	4.7104	FGA, MBP, CD5L
myelin sheath	GO:0043209	1	19	30	18884	0.0297706	0.0488237	33.1298	MBP
tertiary granule lumen	GO:1904724	1	19	55	18884	0.053936	0.0850529	18.0708	HP
specific granule lumen	GO:0035580	1	19	62	18884	0.0605995	0.0920214	16.0306	HP
cell periphery	GO:0071944	1	19	85	18884	0.082182	0.120338	11.6929	MBP
extracellular vesicle	GO:1903561	1	19	134	18884	0.126606	0.178995	7.41712	FGA
plasma membrane	GO:0005886	7	19	5098	18884	0.233366	0.318933	1.3647	FGA, MBP, IGLV5-45, IGKV4-1, IGLV3-21, IGLV1-47, CD5L
early endosome	GO:0005769	1	19	288	18884	0.253337	0.335059	3.45102	APOC3
endoplasmic reticulum lumen	GO:0005788	1	19	304	18884	0.265455	0.340115	3.26939	FGA
neuronal cell body	GO:0043025	1	19	376	18884	0.317717	0.394739	2.64334	MBP
protein-containing complex	GO:0032991	1	19	729	18884	0.526865	0.635337	1.36337	MBP
synapse	GO:0045202	1	19	815	18884	0.5677	0.66502	1.2195	MBP
cell projection	GO:0042995	1	19	1166	18884	0.702262	0.799798	0.852397	MBP
endoplasmic reticulum	GO:0005783	1	19	1580	18884	0.81005	0.897623	0.629047	IGLL1
nucleus	GO:0005634	1	19	6640	18884	0.999735	0.999856	0.149683	MBP
cytoplasm	GO:0005737	1	19	7027	18884	0.999856	0.999856	0.141439	CD5L
cytosol	GO:0005829	1	19	5322	18884	0.998151	0.999856	0.186752	MBP
membrane	GO:0016020	3	19	7824	18884	0.996162	0.999856	0.381095	MBP, IGLL1, CD5L

[truncated: 4 more sheets: Table S11, Table S12, Table S13, Hoja1]
